# Supplementary material for: Potential urinary aging markers of 20-month-old rats
Source: PeerJ. 2016 Jun 7;4:e2058. doi: 10.7717/peerj.2058 (PMC4906655; doi:10.7717/peerj.2058)
Supplement: Table S1 [file peerj-04-2058-s001.xlsx]

## Sheet: P<0.05&H-Spec>=1
								Spectral counts																		Normalized abundance
								Young									Old									Young									Old
Accession	Peptide count	Peptides used for quantitation	Confidence score	Anova (p)	Max fold change	Highest mean condition	Description	Y1	Y2	Y3	Y4	Y5	Y6	Y7	Y8	Y9	O1	O2	O3	O4	O5	O6	O7	O8	O9	Y1	Y2	Y3	Y4	Y5	Y6	Y7	Y8	Y9	O1	O2	O3	O4	O5	O6	O7	O8	O9
P08932	23	7	2734.48	1.84962e-06	8.50123	Old	T-kininogen 2 OS=Rattus norvegicus PE=1 SV=2	0	0	0	1	1	0	0	0	0	25	22	19	22	14	6	24	37	2	481391	1.01949e+06	581378	811589	1.1232e+06	465968	511936	527787	415740	3.75893e+06	4.25362e+06	4.50621e+06	3.9314e+06	9.01704e+06	1.47262e+06	1.01328e+07	1.66109e+07	1.64707e+06
P01048	22	6	2652.18	6.64208e-06	9.03242	Old	T-kininogen 1 OS=Rattus norvegicus GN=Map1 PE=1 SV=2	0	1	1	4	1	3	2	4	5	50	51	45	41	83	39	60	49	21	2.95123e+06	2.99433e+06	4.98162e+06	4.95424e+06	2.38728e+06	3.68088e+06	3.48124e+06	3.49182e+06	3.8716e+06	2.09057e+07	2.04276e+07	1.71526e+07	1.89808e+07	1.64914e+08	1.69404e+07	6.24358e+07	5.98341e+07	1.74313e+07
P02770	49	49	7414.4	0.0050866	4.45351	Old	Serum albumin OS=Rattus norvegicus GN=Alb PE=1 SV=2	113	511	170	572	523	616	595	553	500	791	854	697	710	654	545	1103	1203	564	2.5233e+08	8.32407e+08	1.68886e+08	1.08704e+09	8.44737e+08	1.17677e+09	1.27859e+09	1.11904e+09	9.8311e+08	1.66224e+09	1.62906e+09	1.13419e+09	9.71119e+08	4.36673e+09	1.07423e+09	6.39156e+09	1.70325e+10	1.42453e+09
P12346	38	37	4031.27	0.00120206	6.08758	Old	Serotransferrin OS=Rattus norvegicus GN=Tf PE=1 SV=3	20	55	16	60	53	110	94	52	82	132	107	81	75	89	108	183	226	119	2.13796e+07	3.28337e+07	1.55698e+07	4.18145e+07	3.08523e+07	6.22744e+07	6.92623e+07	4.30242e+07	5.53408e+07	1.06394e+08	9.17281e+07	5.58462e+07	4.02176e+07	2.31851e+08	7.60041e+07	4.28912e+08	1.11392e+09	8.66701e+07
P09006	7	7	556.93	0.0062826	6.40675	Old	Serine protease inhibitor A3N OS=Rattus norvegicus GN=Serpina3n PE=1 SV=3	5	2	3	4	2	6	5	4	4	11	10	5	5	20	7	5	29	15	2.04382e+06	1.33102e+06	1.16818e+06	2.11577e+06	1.65897e+06	2.58538e+06	1.51217e+06	2.74587e+06	1.561e+06	2.62844e+06	2.63279e+06	2.03514e+06	1.9971e+06	2.02012e+07	3.77368e+06	6.50198e+06	6.14004e+07	4.91892e+06
P20767	9	9	1144.61	0.0249532	5.17947	Old	Ig lambda-2 chain C region OS=Rattus norvegicus PE=2 SV=1	52	53	68	65	57	46	69	76	78	97	95	126	142	71	123	80	66	132	4.97841e+07	4.50503e+07	3.57986e+07	5.37105e+07	3.83025e+07	5.22686e+07	6.42723e+07	7.83636e+07	1.05999e+08	1.36189e+08	1.00112e+08	2.85372e+08	2.42708e+08	6.87196e+08	3.20858e+08	3.79105e+08	2.14031e+08	3.52767e+08
P01681	4	4	403.26	0.0123017	2.94568	Old	Ig kappa chain V region S211 OS=Rattus norvegicus PE=1 SV=1	3	0	3	1	0	5	9	20	12	50	24	20	13	38	25	19	15	26	3.63751e+06	1.04389e+06	3.76119e+06	1.09254e+07	1.18332e+06	8.22217e+06	1.58867e+07	2.80185e+07	2.06017e+07	2.57096e+07	2.48398e+07	2.24105e+07	1.70017e+07	7.34818e+07	2.3701e+07	3.44142e+07	7.46798e+07	2.64785e+07
P01835	14	8	1906.92	0.0159684	3.73992	Old	Ig kappa chain C region, B allele OS=Rattus norvegicus PE=1 SV=1	52	2	68	61	4	2	81	93	84	175	184	164	160	32	136	95	17	151	2.20063e+08	9.67051e+06	1.40249e+08	2.23744e+08	9.19277e+06	1.32828e+07	4.55209e+08	5.45556e+08	6.368e+08	1.04026e+09	8.97625e+08	1.38092e+09	9.18954e+08	9.09591e+07	1.42887e+09	1.49498e+09	6.60116e+07	1.08793e+09
P20761	8	8	840.09	0.00404665	14.9266	Old	Ig gamma-2B chain C region OS=Rattus norvegicus GN=Igh-1a PE=1 SV=1	0	3	0	6	0	3	3	3	1	14	9	6	3	3	10	24	49	10	1.48759e+06	2.41157e+06	1.00423e+06	2.78116e+06	2.53152e+06	2.55899e+06	2.46101e+06	3.62224e+06	1.32193e+06	7.29091e+06	6.60228e+06	3.02081e+06	2.31003e+06	1.35779e+07	9.3969e+06	3.64925e+07	2.45244e+08	7.16702e+06
P20760	21	15	2193.38	8.86207e-08	19.4458	Old	Ig gamma-2A chain C region OS=Rattus norvegicus GN=Igg-2a PE=1 SV=1	13	7	13	15	4	6	3	1	6	126	128	147	132	147	140	209	198	107	9.02512e+06	2.1104e+07	1.05063e+07	9.59734e+06	1.13627e+07	7.31334e+06	6.86316e+06	6.37144e+06	7.8567e+06	9.29731e+07	9.29718e+07	1.16509e+08	9.51503e+07	4.5116e+08	1.19816e+08	4.51919e+08	6.76346e+08	1.12899e+08
P13635	18	17	1498.27	2.07613e-05	4.53405	Old	Ceruloplasmin OS=Rattus norvegicus GN=Cp PE=1 SV=3	1	8	3	12	12	9	4	3	8	33	31	25	30	31	14	27	27	23	7.37751e+06	4.75566e+06	6.03493e+06	1.0511e+07	6.7509e+06	9.63425e+06	6.5247e+06	8.23694e+06	8.96009e+06	2.12931e+07	1.77287e+07	2.99902e+07	2.21849e+07	6.99396e+07	2.37823e+07	5.99405e+07	5.89164e+07	3.75285e+07
P10959	7	7	520.63	0.0068272	3.16382	Old	Carboxylesterase 1C OS=Rattus norvegicus GN=Ces1c PE=1 SV=3	9	5	6	8	5	8	8	6	7	17	17	22	21	12	9	15	23	11	2.13311e+06	5.375e+06	1.61663e+06	4.95369e+06	5.23669e+06	2.89314e+06	2.07861e+06	1.72491e+06	2.58515e+06	4.75281e+06	3.94392e+06	5.66303e+06	4.55961e+06	1.8565e+07	2.6471e+06	1.30109e+07	3.05933e+07	4.12532e+06
P06760	13	13	845.58	0.0136804	2.15921	Old	Beta-glucuronidase OS=Rattus norvegicus GN=Gusb PE=2 SV=1	0	17	1	15	17	5	1	22	0	25	34	27	28	12	15	5	7	4	2.03918e+06	5.29195e+06	2.18599e+06	1.07132e+07	6.06176e+06	4.81244e+06	1.41983e+06	1.34591e+07	2.72369e+06	1.49726e+07	1.45382e+07	1.36816e+07	1.34033e+07	1.70103e+07	1.30878e+07	7.42212e+06	2.06651e+07	3.37072e+06
P14046	34	10	2639.2	0.0121238	2.29486	Old	Alpha-1-inhibitor 3 OS=Rattus norvegicus GN=A1i3 PE=1 SV=1	10	5	10	14	8	21	6	10	7	18	14	21	21	14	29	31	12	16	6.93545e+06	3.81743e+06	5.12043e+06	4.62289e+06	4.27012e+06	1.28697e+07	3.18595e+06	4.36511e+06	2.97368e+06	7.03285e+06	5.81822e+06	8.97881e+06	6.74198e+06	1.80424e+07	1.59592e+07	1.96749e+07	1.86798e+07	9.01866e+06
P17475	20	20	1849.95	0.00827721	4.24795	Old	Alpha-1-antiproteinase OS=Rattus norvegicus GN=Serpina1 PE=1 SV=2	12	27	19	23	19	15	11	8	11	45	66	52	67	48	25	64	87	23	1.63949e+07	1.39378e+07	1.09475e+07	1.69443e+07	1.44965e+07	1.61488e+07	1.13435e+07	7.67204e+06	9.44937e+06	1.62285e+07	1.5813e+07	1.80931e+07	2.16117e+07	1.09754e+08	1.95497e+07	8.67587e+07	2.33593e+08	1.99425e+07
P81828	2	2	336.04	0.0314091	3.27536	Young	Urinary protein 2 OS=Rattus norvegicus PE=1 SV=1	60	114	67	94	117	115	120	104	123	65	67	93	92	66	100	90	49	44	2.76785e+08	1.57217e+09	1.76979e+08	7.88733e+08	1.17809e+09	1.9852e+09	1.63929e+09	1.66748e+09	1.79308e+09	1.45233e+08	1.20512e+08	4.85241e+08	2.56112e+08	9.25692e+08	5.84128e+08	3.57472e+08	2.17675e+08	2.54846e+08
P81827	2	2	188	0.00703814	7.17507	Young	Urinary protein 1 OS=Rattus norvegicus PE=1 SV=1	29	46	38	27	46	45	46	48	46	6	5	26	30	15	27	2	1	10	8.29593e+07	2.80765e+08	6.17152e+07	1.47014e+08	1.96972e+08	6.39749e+08	5.91418e+08	5.99259e+08	5.71353e+08	2.50487e+07	2.01792e+07	9.30293e+07	8.01014e+07	5.26253e+07	6.39293e+07	1.76004e+07	2.41988e+06	3.65665e+07
P23680	3	3	219.91	0.0111021	2.8981	Young	Serum amyloid P-component OS=Rattus norvegicus GN=Apcs PE=2 SV=2	7	4	5	3	3	4	8	5	11	3	3	3	2	2	4	3	0	4	2.03071e+06	686599	1.68899e+06	954534	706342	1.78028e+06	3.04897e+06	1.86394e+06	5.31444e+06	578896	598410	601399	548644	736416	707967	915846	168597	1.48083e+06
P02780	5	5	454.74	0.0366423	3.24937	Young	Secretoglobin family 2A member 2 OS=Rattus norvegicus GN=Scgb2a2 PE=1 SV=1	38	32	54	16	26	20	42	38	32	26	34	16	23	0	29	2	0	18	3.42406e+08	1.19458e+08	2.46816e+08	5.88203e+07	9.67655e+07	6.62979e+07	3.70656e+08	1.17068e+08	1.10291e+08	1.11958e+08	8.89981e+07	7.9237e+07	6.05157e+07	241198	7.51512e+07	2.31362e+06	238216	4.82125e+07
P42854	3	3	455.1	0.000987281	6.37751	Young	Regenerating islet-derived protein 3-gamma OS=Rattus norvegicus GN=Reg3g PE=1 SV=1	24	22	16	32	27	37	36	17	68	11	15	13	12	0	3	0	0	5	1.03273e+07	2.36304e+07	1.41495e+07	2.55353e+07	2.92987e+07	6.17353e+07	9.26513e+07	1.17133e+07	1.46367e+08	1.06464e+07	1.26522e+07	6.81133e+06	8.38745e+06	2.75975e+06	3.11738e+06	3.7726e+06	2.20561e+06	1.02907e+07
P18292	7	7	654.71	0.0011682	3.76	Young	Prothrombin OS=Rattus norvegicus GN=F2 PE=1 SV=1	19	12	22	23	5	14	18	27	28	7	8	5	5	9	9	7	0	15	2.12716e+07	1.31396e+07	1.30661e+07	1.2441e+07	5.50451e+06	2.18123e+07	3.29834e+07	3.8826e+07	5.13209e+07	4.12717e+06	4.47912e+06	1.49904e+06	1.97227e+06	2.45558e+07	6.42488e+06	1.33336e+07	4.20404e+06	1.06956e+07
P07522	43	43	4154.97	0.0098516	2.20896	Young	Pro-epidermal growth factor OS=Rattus norvegicus GN=Egf PE=1 SV=2	314	105	280	184	114	207	282	386	357	147	165	128	139	97	140	82	26	117	3.35654e+08	1.39974e+08	2.38181e+08	2.70164e+08	1.54786e+08	1.91361e+08	1.98236e+08	3.50028e+08	2.87725e+08	1.07152e+08	9.78602e+07	1.28766e+08	1.00341e+08	1.53418e+08	1.40043e+08	7.13557e+07	5.97638e+07	1.04025e+08
Q64319	17	17	1193.31	0.00508501	3.83568	Young	Neutral and basic amino acid transport protein rBAT OS=Rattus norvegicus GN=Slc3a1 PE=1 SV=1	40	19	45	37	20	36	18	13	18	0	1	3	0	5	4	6	0	7	2.02005e+07	1.32191e+07	1.41554e+07	1.58053e+07	9.29044e+06	1.8297e+07	3.84171e+06	5.53207e+06	5.07204e+06	1.44795e+06	1.78523e+06	1.65627e+06	1.83342e+06	6.01527e+06	3.17976e+06	5.333e+06	1.89165e+06	3.55345e+06
Q9JJ40	8	8	381.84	0.000945792	3.83696	Young	Na(+)/H(+) exchange regulatory cofactor NHE-RF3 OS=Rattus norvegicus GN=Pdzk1 PE=1 SV=2	11	1	8	8	1	3	2	2	3	0	0	0	0	0	0	3	0	2	3.35425e+06	647079	1.5643e+06	2.84913e+06	740734	2.25654e+06	339108	369134	747699	164516	101594	107339	155738	253181	289067	1.69702e+06	251223	650291
Q9JJ19	6	6	307.62	0.0311048	3.24152	Young	Na(+)/H(+) exchange regulatory cofactor NHE-RF1 OS=Rattus norvegicus GN=Slc9a3r1 PE=1 SV=3	10	2	3	7	4	13	1	3	1	0	0	0	0	0	5	1	0	1	3.25617e+06	430527	1.87029e+06	1.88402e+06	458634	2.06062e+06	564264	554910	433674	259604	209290	220737	129525	154024	731850	1.03503e+06	495847	326937
Q5XI43	17	16	1214.67	0.0051801	1.94045	Young	Matrix-remodeling-associated protein 8 OS=Rattus norvegicus GN=Mxra8 PE=2 SV=1	18	15	23	18	10	24	36	37	41	19	18	16	12	6	16	6	0	28	1.85874e+07	8.79019e+06	1.04293e+07	1.28762e+07	8.21377e+06	1.29339e+07	2.00287e+07	2.18083e+07	2.12433e+07	7.51884e+06	6.28758e+06	9.01307e+06	5.49239e+06	1.21053e+07	6.57644e+06	7.1609e+06	1.49716e+06	1.63608e+07
Q6IMF3	9	6	752.03	0.0346659	1.5316	Young	Keratin, type II cytoskeletal 1 OS=Rattus norvegicus GN=Krt1 PE=2 SV=1	6	8	6	6	7	12	5	8	9	12	13	11	6	6	11	7	1	14	6.8298e+06	1.28394e+07	7.79619e+06	5.72292e+06	1.38981e+07	1.365e+07	5.24799e+06	5.08095e+06	7.31745e+06	4.56982e+06	3.68006e+06	4.73316e+06	5.04242e+06	5.84113e+06	5.91465e+06	4.57684e+06	4.7467e+06	5.3874e+06
P07314	9	9	666.99	0.00671441	2.49121	Young	Gamma-glutamyltranspeptidase 1 OS=Rattus norvegicus GN=Ggt1 PE=1 SV=4	34	19	34	27	18	26	12	13	18	9	6	6	7	10	18	13	3	20	1.8732e+07	5.63125e+06	1.19067e+07	1.29884e+07	4.93213e+06	1.27399e+07	4.28233e+06	5.608e+06	4.15588e+06	1.60156e+06	1.57057e+06	1.2312e+06	1.22179e+06	6.36715e+06	4.92148e+06	9.09813e+06	3.56052e+06	3.5979e+06
P04937	11	11	1013.72	0.000151599	4.20876	Young	Fibronectin OS=Rattus norvegicus GN=Fn1 PE=1 SV=2	10	8	8	14	7	14	31	21	31	5	3	6	1	2	5	3	0	1	4.46911e+06	2.21756e+06	2.3686e+06	3.90391e+06	2.70708e+06	4.30913e+06	1.24424e+07	7.10192e+06	1.50848e+07	1.21962e+06	902783	1.16267e+06	686744	3.31708e+06	2.0154e+06	1.69793e+06	843415	1.27273e+06
P14740	12	12	800.41	0.03279	1.55688	Young	Dipeptidyl peptidase 4 OS=Rattus norvegicus GN=Dpp4 PE=1 SV=2	22	10	26	15	9	10	15	14	15	8	11	7	6	7	12	13	5	13	1.2721e+07	5.4812e+06	7.43848e+06	7.75975e+06	6.21495e+06	6.48724e+06	5.48691e+06	7.96338e+06	6.04732e+06	2.54336e+06	2.5172e+06	3.61124e+06	3.15345e+06	8.57567e+06	7.50018e+06	3.96827e+06	3.06686e+06	5.07061e+06
Q9EPB1	5	5	386.2	0.0387344	2.3827	Young	Dipeptidyl peptidase 2 OS=Rattus norvegicus GN=Dpp7 PE=1 SV=1	21	9	15	13	10	12	27	30	24	11	9	8	9	7	17	6	0	17	1.39558e+07	2.64458e+06	7.81322e+06	3.83964e+06	2.73638e+06	5.17692e+06	1.77726e+07	1.60579e+07	1.61692e+07	3.86657e+06	3.33879e+06	4.83399e+06	3.10978e+06	2.76438e+06	6.32446e+06	4.8466e+06	791448	5.6116e+06
P07151	5	5	339.58	0.00473181	3.59754	Young	Beta-2-microglobulin OS=Rattus norvegicus GN=B2m PE=1 SV=1	4	8	1	23	11	13	4	2	9	2	2	4	3	3	3	3	0	4	5.87432e+06	9.00148e+06	2.4427e+06	1.73707e+07	7.68641e+06	6.44744e+06	1.73253e+06	1.30451e+06	3.87121e+06	1.34387e+06	1.50913e+06	2.21863e+06	1.96659e+06	4.62543e+06	1.97074e+06	2.70031e+06	936315	2.54112e+06
P15684	14	14	1307.19	0.0014623	2.46945	Young	Aminopeptidase N OS=Rattus norvegicus GN=Anpep PE=1 SV=2	9	19	11	24	17	16	6	14	7	7	5	5	5	3	8	7	1	7	1.37527e+07	8.7271e+06	8.72366e+06	1.38281e+07	9.20933e+06	1.63008e+07	4.38214e+06	6.58265e+06	6.70965e+06	4.71936e+06	4.31243e+06	2.43678e+06	2.38945e+06	6.15762e+06	4.81369e+06	5.95951e+06	1.22034e+06	5.88605e+06

## Sheet: Minimun H-Spec>Maximun L-Spec
								Spectral counts																		Normalized abundance
								Young									Old									Young									Old
Accession	Peptide count	Peptides used for quantitation	Confidence score	Anova (p)	Max fold change	Highest mean condition	Description	Y1	Y2	Y3	Y4	Y5	Y6	Y7	Y8	Y9	O1	O2	O3	O4	O5	O6	O7	O8	O9	Y1	Y2	Y3	Y4	Y5	Y6	Y7	Y8	Y9	O1	O2	O3	O4	O5	O6	O7	O8	O9
P20760	21	15	2193.38	8.86207e-08	19.4458	Old	Ig gamma-2A chain C region OS=Rattus norvegicus GN=Igg-2a PE=1 SV=1	13	7	13	15	4	6	3	1	6	126	128	147	132	147	140	209	198	107	9.02512e+06	2.1104e+07	1.05063e+07	9.59734e+06	1.13627e+07	7.31334e+06	6.86316e+06	6.37144e+06	7.8567e+06	9.29731e+07	9.29718e+07	1.16509e+08	9.51503e+07	4.5116e+08	1.19816e+08	4.51919e+08	6.76346e+08	1.12899e+08
P08932	23	7	2734.48	1.84962e-06	8.50123	Old	T-kininogen 2 OS=Rattus norvegicus PE=1 SV=2	0	0	0	1	1	0	0	0	0	25	22	19	22	14	6	24	37	2	481391	1.01949e+06	581378	811589	1.1232e+06	465968	511936	527787	415740	3.75893e+06	4.25362e+06	4.50621e+06	3.9314e+06	9.01704e+06	1.47262e+06	1.01328e+07	1.66109e+07	1.64707e+06
P01048	22	6	2652.18	6.64208e-06	9.03242	Old	T-kininogen 1 OS=Rattus norvegicus GN=Map1 PE=1 SV=2	0	1	1	4	1	3	2	4	5	50	51	45	41	83	39	60	49	21	2.95123e+06	2.99433e+06	4.98162e+06	4.95424e+06	2.38728e+06	3.68088e+06	3.48124e+06	3.49182e+06	3.8716e+06	2.09057e+07	2.04276e+07	1.71526e+07	1.89808e+07	1.64914e+08	1.69404e+07	6.24358e+07	5.98341e+07	1.74313e+07
P13635	18	17	1498.27	2.07613e-05	4.53405	Old	Ceruloplasmin OS=Rattus norvegicus GN=Cp PE=1 SV=3	1	8	3	12	12	9	4	3	8	33	31	25	30	31	14	27	27	23	7.37751e+06	4.75566e+06	6.03493e+06	1.0511e+07	6.7509e+06	9.63425e+06	6.5247e+06	8.23694e+06	8.96009e+06	2.12931e+07	1.77287e+07	2.99902e+07	2.21849e+07	6.99396e+07	2.37823e+07	5.99405e+07	5.89164e+07	3.75285e+07
P10959	7	7	520.63	0.0068272	3.16382	Old	Carboxylesterase 1C OS=Rattus norvegicus GN=Ces1c PE=1 SV=3	9	5	6	8	5	8	8	6	7	17	17	22	21	12	9	15	23	11	2.13311e+06	5.375e+06	1.61663e+06	4.95369e+06	5.23669e+06	2.89314e+06	2.07861e+06	1.72491e+06	2.58515e+06	4.75281e+06	3.94392e+06	5.66303e+06	4.55961e+06	1.8565e+07	2.6471e+06	1.30109e+07	3.05933e+07	4.12532e+06
P04937	11	11	1013.72	0.000151599	4.20876	Young	Fibronectin OS=Rattus norvegicus GN=Fn1 PE=1 SV=2	10	8	8	14	7	14	31	21	31	5	3	6	1	2	5	3	0	1	4.46911e+06	2.21756e+06	2.3686e+06	3.90391e+06	2.70708e+06	4.30913e+06	1.24424e+07	7.10192e+06	1.50848e+07	1.21962e+06	902783	1.16267e+06	686744	3.31708e+06	2.0154e+06	1.69793e+06	843415	1.27273e+06
P42854	3	3	455.1	0.000987281	6.37751	Young	Regenerating islet-derived protein 3-gamma OS=Rattus norvegicus GN=Reg3g PE=1 SV=1	24	22	16	32	27	37	36	17	68	11	15	13	12	0	3	0	0	5	1.03273e+07	2.36304e+07	1.41495e+07	2.55353e+07	2.92987e+07	6.17353e+07	9.26513e+07	1.17133e+07	1.46367e+08	1.06464e+07	1.26522e+07	6.81133e+06	8.38745e+06	2.75975e+06	3.11738e+06	3.7726e+06	2.20561e+06	1.02907e+07
Q64319	17	17	1193.31	0.00508501	3.83568	Young	Neutral and basic amino acid transport protein rBAT OS=Rattus norvegicus GN=Slc3a1 PE=1 SV=1	40	19	45	37	20	36	18	13	18	0	1	3	0	5	4	6	0	7	2.02005e+07	1.32191e+07	1.41554e+07	1.58053e+07	9.29044e+06	1.8297e+07	3.84171e+06	5.53207e+06	5.07204e+06	1.44795e+06	1.78523e+06	1.65627e+06	1.83342e+06	6.01527e+06	3.17976e+06	5.333e+06	1.89165e+06	3.55345e+06
