# Supplementary material for: Potential urinary aging markers of 20-month-old rats
Source: PeerJ. 2016 Jun 7;4:e2058. doi: 10.7717/peerj.2058 (PMC4906655; doi:10.7717/peerj.2058)
Supplement: Table S2 [file peerj-04-2058-s002.xlsx]

## Sheet: Total proteins
All the identified proteins									Spectral counts																		Normalized abundance
									Young									Old									Young									Old
Accession	Peptide count	Peptides used for quantitation	Confidence score	Anova (p)	Max fold change	Highest mean condition	Lowest mean condition	Description	Y1	Y2	Y3	Y4	Y5	Y6	Y7	Y8	Y9	O1	O2	O3	O4	O5	O6	O7	O8	O9	Y1	Y2	Y3	Y4	Y5	Y6	Y7	Y8	Y9	O1	O2	O3	O4	O5	O6	O7	O8	O9
P02770	49	49	7414.4	0.0050866	4.45351	Old	Young	Serum albumin OS=Rattus norvegicus GN=Alb PE=1 SV=2	113	511	170	572	523	616	595	553	500	791	854	697	710	654	545	1103	1203	564	2.5233e+08	8.32407e+08	1.68886e+08	1.08704e+09	8.44737e+08	1.17677e+09	1.27859e+09	1.11904e+09	9.8311e+08	1.66224e+09	1.62906e+09	1.13419e+09	9.71119e+08	4.36673e+09	1.07423e+09	6.39156e+09	1.70325e+10	1.42453e+09
P02761	20	17	2088.64	0.462793	2.26227	Young	Old	Major urinary protein OS=Rattus norvegicus PE=1 SV=1	109	199	81	232	200	124	25	57	16	133	136	172	159	45	104	11	26	80	4.70793e+08	1.84411e+09	2.46533e+08	2.71965e+09	1.88332e+09	8.62919e+08	7.42092e+07	1.11852e+08	7.66316e+07	5.31131e+08	4.3546e+08	7.45055e+08	5.17159e+08	5.3742e+08	4.14905e+08	1.5355e+08	1.92711e+08	5.70856e+08
P81828	2	2	336.04	0.0314091	3.27536	Young	Old	Urinary protein 2 OS=Rattus norvegicus PE=1 SV=1	60	114	67	94	117	115	120	104	123	65	67	93	92	66	100	90	49	44	2.76785e+08	1.57217e+09	1.76979e+08	7.88733e+08	1.17809e+09	1.9852e+09	1.63929e+09	1.66748e+09	1.79308e+09	1.45233e+08	1.20512e+08	4.85241e+08	2.56112e+08	9.25692e+08	5.84128e+08	3.57472e+08	2.17675e+08	2.54846e+08
P07522	43	43	4154.97	0.0098516	2.20896	Young	Old	Pro-epidermal growth factor OS=Rattus norvegicus GN=Egf PE=1 SV=2	314	105	280	184	114	207	282	386	357	147	165	128	139	97	140	82	26	117	3.35654e+08	1.39974e+08	2.38181e+08	2.70164e+08	1.54786e+08	1.91361e+08	1.98236e+08	3.50028e+08	2.87725e+08	1.07152e+08	9.78602e+07	1.28766e+08	1.00341e+08	1.53418e+08	1.40043e+08	7.13557e+07	5.97638e+07	1.04025e+08
P02782	8	8	1140.27	0.777809	1.21093	Old	Young	Prostatic steroid-binding protein C1 OS=Rattus norvegicus GN=Psbpc1 PE=1 SV=1	137	82	170	45	78	57	151	84	68	111	113	83	83	66	75	16	124	29	4.86621e+08	1.93617e+08	2.75425e+08	6.46169e+07	1.92441e+08	8.82684e+07	5.91739e+08	2.30928e+08	1.71479e+08	2.17658e+08	1.99149e+08	1.20687e+08	9.52741e+07	5.38588e+08	1.26938e+08	4.22235e+07	1.36069e+09	5.70854e+07
P27590	27	27	2218.82	0.999783	1.0015	Old	Young	Uromodulin OS=Rattus norvegicus GN=Umod PE=2 SV=1	179	64	148	217	65	130	124	145	189	132	123	124	143	117	196	155	10	132	1.70934e+08	6.63665e+07	1.02449e+08	2.86107e+08	6.18395e+07	1.15332e+08	1.09927e+08	1.23924e+08	1.74691e+08	1.06379e+08	1.03375e+08	1.25982e+08	1.13225e+08	2.50072e+08	1.83665e+08	1.73656e+08	6.49171e+07	1.37008e+08
P22282	17	15	1919.32	0.149638	2.26716	Young	Old	Cystatin-related protein 1 OS=Rattus norvegicus GN=Andpro PE=1 SV=1	223	56	231	40	63	31	110	45	32	42	50	26	31	32	28	1	82	7	9.21586e+08	1.92344e+08	4.80622e+08	4.54432e+07	2.09331e+08	5.35605e+07	2.72903e+08	1.15267e+08	9.44376e+07	1.1149e+08	9.81034e+07	4.54861e+07	3.0086e+07	1.74612e+08	3.17239e+07	4.75032e+07	4.45175e+08	3.7948e+07
P12346	38	37	4031.27	0.00120206	6.08758	Old	Young	Serotransferrin OS=Rattus norvegicus GN=Tf PE=1 SV=3	20	55	16	60	53	110	94	52	82	132	107	81	75	89	108	183	226	119	2.13796e+07	3.28337e+07	1.55698e+07	4.18145e+07	3.08523e+07	6.22744e+07	6.92623e+07	4.30242e+07	5.53408e+07	1.06394e+08	9.17281e+07	5.58462e+07	4.02176e+07	2.31851e+08	7.60041e+07	4.28912e+08	1.11392e+09	8.66701e+07
P20767	9	9	1144.61	0.0249532	5.17947	Old	Young	Ig lambda-2 chain C region OS=Rattus norvegicus PE=2 SV=1	52	53	68	65	57	46	69	76	78	97	95	126	142	71	123	80	66	132	4.97841e+07	4.50503e+07	3.57986e+07	5.37105e+07	3.83025e+07	5.22686e+07	6.42723e+07	7.83636e+07	1.05999e+08	1.36189e+08	1.00112e+08	2.85372e+08	2.42708e+08	6.87196e+08	3.20858e+08	3.79105e+08	2.14031e+08	3.52767e+08
P81827	2	2	188	0.00703814	7.17507	Young	Old	Urinary protein 1 OS=Rattus norvegicus PE=1 SV=1	29	46	38	27	46	45	46	48	46	6	5	26	30	15	27	2	1	10	8.29593e+07	2.80765e+08	6.17152e+07	1.47014e+08	1.96972e+08	6.39749e+08	5.91418e+08	5.99259e+08	5.71353e+08	2.50487e+07	2.01792e+07	9.30293e+07	8.01014e+07	5.26253e+07	6.39293e+07	1.76004e+07	2.41988e+06	3.65665e+07
P01836	14	8	1944.66	0.0259313	15.3085	Young	Old	Ig kappa chain C region, A allele OS=Rattus norvegicus PE=1 SV=1	0	43	0	96	45	71	0	0	0	0	0	0	0	0	2	1	0	0	1.64503e+06	7.60999e+07	1.37377e+06	1.07808e+08	5.04679e+07	5.77605e+07	2.11679e+06	1.41892e+06	928019	1.10544e+06	1.41759e+06	1.32561e+06	1.55831e+06	1.72599e+06	1.26586e+06	2.94351e+06	5.77711e+06	1.22216e+06
P08723	10	10	1582.56	0.390754	4.12763	Young	Old	Prostatic spermine-binding protein OS=Rattus norvegicus GN=Sbp PE=1 SV=1	288	40	298	9	44	7	49	18	17	30	25	19	20	20	108	9	42	17	1.32818e+09	3.52135e+07	7.15428e+08	2.04801e+07	3.84007e+07	2.82639e+07	7.86317e+07	2.79934e+07	2.29678e+07	2.62482e+07	2.53182e+07	1.37801e+07	1.47294e+07	1.21112e+08	1.04246e+08	2.66953e+07	1.34008e+08	4.08781e+07
Q64240	13	13	1194.5	0.51239	1.95289	Young	Old	Protein AMBP OS=Rattus norvegicus GN=Ambp PE=1 SV=1	9	33	12	57	35	48	56	90	105	48	45	50	42	41	21	37	13	58	3.01694e+07	5.11878e+07	1.80265e+07	9.97643e+07	4.92175e+07	7.48288e+07	1.23015e+08	2.06844e+08	2.55756e+08	4.10156e+07	4.17891e+07	3.82922e+07	3.72504e+07	1.3596e+08	1.85142e+07	3.96282e+07	2.56509e+07	7.33494e+07
P02780	5	5	454.74	0.0366423	3.24937	Young	Old	Secretoglobin family 2A member 2 OS=Rattus norvegicus GN=Scgb2a2 PE=1 SV=1	38	32	54	16	26	20	42	38	32	26	34	16	23	0	29	2	0	18	3.42406e+08	1.19458e+08	2.46816e+08	5.88203e+07	9.67655e+07	6.62979e+07	3.70656e+08	1.17068e+08	1.10291e+08	1.11958e+08	8.89981e+07	7.9237e+07	6.05157e+07	241198	7.51512e+07	2.31362e+06	238216	4.82125e+07
P98158	56	56	4867.56	0.237649	1.49213	Young	Old	Low-density lipoprotein receptor-related protein 2 OS=Rattus norvegicus GN=Lrp2 PE=1 SV=1	65	30	96	53	31	63	52	44	79	39	41	38	36	19	43	21	1	37	3.99038e+07	1.17777e+07	2.99223e+07	1.45155e+07	1.11687e+07	2.24919e+07	1.92742e+07	2.16817e+07	3.23791e+07	1.04421e+07	9.87538e+06	1.0648e+07	7.99772e+06	2.21304e+07	1.61226e+07	1.27056e+07	1.80108e+07	2.08639e+07
P20059	18	18	1600.73	0.123948	2.11157	Old	Young	Hemopexin OS=Rattus norvegicus GN=Hpx PE=1 SV=3	31	30	36	87	31	83	89	39	92	53	61	54	63	53	71	78	122	70	3.4987e+07	3.3581e+07	2.16675e+07	5.78202e+07	3.9085e+07	5.48136e+07	3.47246e+07	3.36171e+07	4.61287e+07	4.40798e+07	4.59259e+07	3.51487e+07	3.38681e+07	1.53995e+08	4.14671e+07	9.27352e+07	2.4132e+08	6.66099e+07
P07632	12	12	1383.15	0.0715385	1.52794	Old	Young	Superoxide dismutase [Cu-Zn] OS=Rattus norvegicus GN=Sod1 PE=1 SV=2	13	30	17	34	30	40	42	28	55	40	46	44	49	17	45	18	16	45	1.06248e+07	2.33794e+07	7.16913e+06	3.4974e+07	2.43895e+07	2.93144e+07	2.78981e+07	2.75834e+07	3.02985e+07	3.44239e+07	3.45051e+07	4.14236e+07	3.47986e+07	3.74498e+07	5.28467e+07	9.20246e+06	3.72124e+07	3.68701e+07
P00689	12	12	1081.59	0.400442	1.19539	Young	Old	Pancreatic alpha-amylase OS=Rattus norvegicus GN=Amy2 PE=2 SV=2	16	29	22	26	24	27	25	32	27	21	25	39	38	3	18	2	0	17	1.09732e+07	2.75775e+07	9.36424e+06	3.87667e+07	2.21958e+07	2.89848e+07	1.46983e+07	1.93888e+07	2.4434e+07	2.64473e+07	2.77676e+07	3.84832e+07	3.47809e+07	1.71559e+06	1.83996e+07	1.35745e+06	168984	1.44693e+07
Q01177	35	35	3141.39	0.332379	1.52751	Young	Old	Plasminogen OS=Rattus norvegicus GN=Plg PE=2 SV=2	15	29	18	47	21	66	62	64	100	38	39	34	29	44	34	54	45	48	1.3327e+07	2.1849e+07	1.08644e+07	2.80673e+07	1.93607e+07	3.55834e+07	7.36065e+07	8.702e+07	1.51218e+08	1.61889e+07	1.48163e+07	1.73086e+07	1.27992e+07	7.46909e+07	1.85919e+07	5.53177e+07	5.87158e+07	3.1973e+07
P17475	20	20	1849.95	0.00827721	4.24795	Old	Young	Alpha-1-antiproteinase OS=Rattus norvegicus GN=Serpina1 PE=1 SV=2	12	27	19	23	19	15	11	8	11	45	66	52	67	48	25	64	87	23	1.63949e+07	1.39378e+07	1.09475e+07	1.69443e+07	1.44965e+07	1.61488e+07	1.13435e+07	7.67204e+06	9.44937e+06	1.62285e+07	1.5813e+07	1.80931e+07	2.16117e+07	1.09754e+08	1.95497e+07	8.67587e+07	2.33593e+08	1.99425e+07
P00758	7	7	855.27	0.819029	1.04937	Old	Young	Kallikrein-1 OS=Rattus norvegicus GN=Ngfg PE=2 SV=2	22	27	19	39	25	46	47	42	74	36	36	36	30	49	32	33	9	45	2.02997e+07	3.1521e+07	1.23513e+07	7.10707e+07	3.39812e+07	5.91901e+07	8.11681e+07	1.16287e+08	1.01173e+08	4.24259e+07	3.97836e+07	5.12927e+07	3.80599e+07	1.50431e+08	6.65556e+07	6.71147e+07	1.91969e+07	7.87862e+07
P07647	11	10	1403.4	0.249416	1.17116	Young	Old	Submandibular glandular kallikrein-9 OS=Rattus norvegicus GN=Klk9 PE=1 SV=1	62	26	79	28	49	29	108	35	29	34	39	30	29	35	20	7	47	8	9.76097e+07	2.43898e+07	6.33624e+07	2.10874e+07	4.5647e+07	2.19013e+07	9.50699e+07	4.13717e+07	1.94112e+07	3.25534e+07	2.88723e+07	1.64528e+07	1.73565e+07	9.98325e+07	2.01609e+07	1.56859e+07	1.43979e+08	1.3954e+07
Q64230	15	15	1478.25	0.90208	1.00519	Old	Young	Meprin A subunit alpha OS=Rattus norvegicus GN=Mep1a PE=1 SV=2	55	23	49	45	23	52	17	20	18	31	38	35	42	27	34	26	6	30	4.13949e+07	1.18898e+07	2.3986e+07	2.55034e+07	1.19651e+07	3.9792e+07	3.08499e+07	2.59573e+07	2.03565e+07	2.79729e+07	2.21621e+07	2.4049e+07	2.05304e+07	4.79848e+07	2.86339e+07	4.09545e+07	1.86162e+07	2.53548e+07
Q9R0T4	9	9	758.04	0.84206	1.14447	Young	Old	Cadherin-1 OS=Rattus norvegicus GN=Cdh1 PE=1 SV=1	39	23	32	31	17	27	45	98	62	31	21	24	27	33	45	38	7	12	2.60485e+07	9.75217e+06	1.97609e+07	1.63779e+07	5.95408e+06	1.2887e+07	3.06029e+07	4.80943e+07	3.38466e+07	1.88612e+07	1.99694e+07	1.38736e+07	1.65335e+07	3.44276e+07	2.28618e+07	2.2012e+07	2.01504e+07	1.10156e+07
P42854	3	3	455.1	0.000987281	6.37751	Young	Old	Regenerating islet-derived protein 3-gamma OS=Rattus norvegicus GN=Reg3g PE=1 SV=1	24	22	16	32	27	37	36	17	68	11	15	13	12	0	3	0	0	5	1.03273e+07	2.36304e+07	1.41495e+07	2.55353e+07	2.92987e+07	6.17353e+07	9.26513e+07	1.17133e+07	1.46367e+08	1.06464e+07	1.26522e+07	6.81133e+06	8.38745e+06	2.75975e+06	3.11738e+06	3.7726e+06	2.20561e+06	1.02907e+07
Q63041	36	35	3243.69	0.592313	1.18977	Young	Old	Alpha-1-macroglobulin OS=Rattus norvegicus GN=A1m PE=1 SV=1	133	21	126	64	30	72	72	61	59	48	49	49	41	44	59	49	3	52	8.59521e+07	1.32371e+07	6.05586e+07	3.74922e+07	1.60915e+07	3.19318e+07	4.0328e+07	4.93924e+07	3.41971e+07	2.2246e+07	2.40895e+07	2.04665e+07	2.18754e+07	4.86115e+07	3.57017e+07	5.66052e+07	5.41165e+07	3.12834e+07
Q68FP1	10	10	1061.13	0.505616	1.66156	Young	Old	Gelsolin OS=Rattus norvegicus GN=Gsn PE=1 SV=1	55	21	34	42	23	22	10	7	27	15	21	19	18	21	10	12	4	26	3.84682e+07	1.11958e+07	2.06178e+07	2.13913e+07	1.06158e+07	1.8645e+07	6.01529e+06	2.33781e+06	1.6835e+07	7.87086e+06	7.43134e+06	7.13527e+06	6.06399e+06	2.39815e+07	6.09939e+06	8.0631e+06	3.14939e+06	1.47439e+07
P05544	23	17	2274.04	0.902853	1.05686	Young	Old	Serine protease inhibitor A3L OS=Rattus norvegicus GN=Serpina3l PE=1 SV=3	49	20	41	39	22	90	80	44	76	55	54	59	67	34	69	49	18	43	3.99216e+07	1.69266e+07	2.74695e+07	4.87808e+07	1.22301e+07	4.89405e+07	4.25166e+07	3.28454e+07	4.59137e+07	2.63794e+07	2.41897e+07	4.34687e+07	4.1129e+07	2.71637e+07	4.15072e+07	4.40188e+07	1.48352e+07	2.90738e+07
Q6IFW6	9	7	639.49	0.191059	1.52572	Young	Old	Keratin, type I cytoskeletal 10 OS=Rattus norvegicus GN=Krt10 PE=2 SV=1	15	20	9	12	15	24	11	5	18	19	12	19	10	2	14	4	0	12	7.6683e+06	7.532e+06	4.12418e+06	4.6727e+06	6.68103e+06	6.39979e+06	2.54846e+06	1.73218e+06	4.32902e+06	3.8051e+06	3.3086e+06	4.4932e+06	3.03931e+06	1.55362e+06	5.85528e+06	1.61351e+06	1.50132e+06	5.3103e+06
Q64319	17	17	1193.31	0.00508501	3.83568	Young	Old	Neutral and basic amino acid transport protein rBAT OS=Rattus norvegicus GN=Slc3a1 PE=1 SV=1	40	19	45	37	20	36	18	13	18	0	1	3	0	5	4	6	0	7	2.02005e+07	1.32191e+07	1.41554e+07	1.58053e+07	9.29044e+06	1.8297e+07	3.84171e+06	5.53207e+06	5.07204e+06	1.44795e+06	1.78523e+06	1.65627e+06	1.83342e+06	6.01527e+06	3.17976e+06	5.333e+06	1.89165e+06	3.55345e+06
P07314	9	9	666.99	0.00671441	2.49121	Young	Old	Gamma-glutamyltranspeptidase 1 OS=Rattus norvegicus GN=Ggt1 PE=1 SV=4	34	19	34	27	18	26	12	13	18	9	6	6	7	10	18	13	3	20	1.8732e+07	5.63125e+06	1.19067e+07	1.29884e+07	4.93213e+06	1.27399e+07	4.28233e+06	5.608e+06	4.15588e+06	1.60156e+06	1.57057e+06	1.2312e+06	1.22179e+06	6.36715e+06	4.92148e+06	9.09813e+06	3.56052e+06	3.5979e+06
P15684	14	14	1307.19	0.0014623	2.46945	Young	Old	Aminopeptidase N OS=Rattus norvegicus GN=Anpep PE=1 SV=2	9	19	11	24	17	16	6	14	7	7	5	5	5	3	8	7	1	7	1.37527e+07	8.7271e+06	8.72366e+06	1.38281e+07	9.20933e+06	1.63008e+07	4.38214e+06	6.58265e+06	6.70965e+06	4.71936e+06	4.31243e+06	2.43678e+06	2.38945e+06	6.15762e+06	4.81369e+06	5.95951e+06	1.22034e+06	5.88605e+06
Q99041	23	23	2156.62	0.4045	1.8683	Young	Old	Protein-glutamine gamma-glutamyltransferase 4 OS=Rattus norvegicus GN=Tgm4 PE=1 SV=2	53	17	78	6	17	12	4	3	13	36	39	16	14	4	11	19	0	0	4.39608e+07	7.00007e+06	2.67806e+07	2.18596e+06	6.20114e+06	3.49764e+06	3.08585e+06	2.01257e+06	4.64204e+06	1.0238e+07	9.106e+06	3.7958e+06	2.63157e+06	2.4362e+06	4.27268e+06	1.65181e+07	2.61817e+06	2.0725e+06
P06760	13	13	845.58	0.0136804	2.15921	Old	Young	Beta-glucuronidase OS=Rattus norvegicus GN=Gusb PE=2 SV=1	0	17	1	15	17	5	1	22	0	25	34	27	28	12	15	5	7	4	2.03918e+06	5.29195e+06	2.18599e+06	1.07132e+07	6.06176e+06	4.81244e+06	1.41983e+06	1.34591e+07	2.72369e+06	1.49726e+07	1.45382e+07	1.36816e+07	1.34033e+07	1.70103e+07	1.30878e+07	7.42212e+06	2.06651e+07	3.37072e+06
P06866	14	14	1037.35	0.37999	1.34721	Old	Young	Haptoglobin OS=Rattus norvegicus GN=Hp PE=1 SV=3	1	17	1	38	21	13	12	11	11	33	37	10	13	12	11	12	7	8	1.16644e+06	7.62691e+06	919623	1.13218e+07	8.57767e+06	5.41302e+06	3.86654e+06	3.76829e+06	3.5491e+06	1.6743e+07	1.49015e+07	3.46726e+06	2.23397e+06	6.70077e+06	4.45185e+06	7.51408e+06	3.32144e+06	2.31112e+06
P36953	16	16	1448.05	0.778755	1.21625	Old	Young	Afamin OS=Rattus norvegicus GN=Afm PE=2 SV=1	6	16	11	32	11	20	18	17	11	21	20	17	18	24	10	24	16	11	6.68406e+06	5.7958e+06	3.06635e+06	9.53863e+06	4.49885e+06	5.68095e+06	4.30998e+06	5.73638e+06	4.62168e+06	4.89318e+06	5.50491e+06	4.59579e+06	3.90617e+06	1.52975e+07	2.28057e+06	6.48031e+06	1.41159e+07	3.74145e+06
P24090	9	9	758.42	0.0749035	2.66188	Young	Old	Alpha-2-HS-glycoprotein OS=Rattus norvegicus GN=Ahsg PE=1 SV=2	3	16	5	22	12	21	35	27	44	6	5	3	8	0	6	5	3	8	7.95546e+06	1.43428e+07	1.05213e+07	2.83895e+07	1.13454e+07	2.11092e+07	2.45392e+07	3.33276e+07	4.34182e+07	4.47509e+06	5.7747e+06	7.00852e+06	6.29236e+06	5.01258e+06	3.91056e+06	6.2783e+06	1.35748e+07	5.38165e+06
P22283	10	8	916.13	0.105451	1.90217	Young	Old	Cystatin-related protein 2 OS=Rattus norvegicus GN=Crp2 PE=2 SV=1	54	15	59	7	12	7	58	21	18	16	15	16	10	41	14	2	42	8	2.3791e+08	3.46567e+07	1.07168e+08	1.18153e+07	3.61513e+07	2.41564e+07	1.13096e+08	4.19659e+07	2.71207e+07	2.22901e+07	1.82135e+07	2.60734e+07	1.94653e+07	1.18181e+08	2.50178e+07	7.94857e+06	1.55718e+08	2.32833e+07
P21704	9	9	661.5	0.985629	1.02963	Old	Young	Deoxyribonuclease-1 OS=Rattus norvegicus GN=Dnase1 PE=2 SV=1	54	15	43	39	18	55	25	51	44	43	41	52	55	53	59	31	4	60	6.03671e+07	1.10757e+07	3.81754e+07	3.35301e+07	1.18919e+07	3.00309e+07	2.56214e+07	5.94701e+07	4.51434e+07	2.87929e+07	2.64885e+07	3.13134e+07	2.53846e+07	7.80909e+07	3.90418e+07	3.5446e+07	1.91721e+07	4.48963e+07
Q5XI43	17	16	1214.67	0.0051801	1.94045	Young	Old	Matrix-remodeling-associated protein 8 OS=Rattus norvegicus GN=Mxra8 PE=2 SV=1	18	15	23	18	10	24	36	37	41	19	18	16	12	6	16	6	0	28	1.85874e+07	8.79019e+06	1.04293e+07	1.28762e+07	8.21377e+06	1.29339e+07	2.00287e+07	2.18083e+07	2.12433e+07	7.51884e+06	6.28758e+06	9.01307e+06	5.49239e+06	1.21053e+07	6.57644e+06	7.1609e+06	1.49716e+06	1.63608e+07
P00787	11	10	1487.42	0.588486	1.72027	Old	Young	Cathepsin B OS=Rattus norvegicus GN=Ctsb PE=1 SV=2	7	15	6	33	17	20	9	9	8	9	12	6	10	5	9	2	2	13	874222	2.74602e+06	853176	6.60239e+06	2.50706e+06	2.53473e+06	1.43076e+06	2.5526e+06	2.10376e+06	1.95621e+06	2.04798e+06	1.34115e+06	1.45436e+06	3.40344e+06	2.00286e+06	2.62813e+06	5.80993e+06	1.8213e+06
P14841	3	3	382.36	0.666226	1.19823	Young	Old	Cystatin-C OS=Rattus norvegicus GN=Cst3 PE=1 SV=2	4	13	4	20	11	9	11	21	19	15	14	13	19	2	12	9	1	13	7.51748e+06	1.39029e+07	4.63205e+06	3.23471e+07	9.18156e+06	1.93768e+07	1.93408e+07	2.37142e+07	3.83754e+07	1.59006e+07	1.3578e+07	1.91991e+07	1.23829e+07	1.50257e+07	1.62242e+07	1.88396e+07	1.72615e+06	2.79841e+07
P15083	22	22	2333.45	0.268635	1.06726	Old	Young	Polymeric immunoglobulin receptor OS=Rattus norvegicus GN=Pigr PE=2 SV=1	77	12	51	26	7	23	16	21	26	41	33	26	14	30	54	22	3	30	6.99587e+07	1.22462e+07	3.81208e+07	1.17492e+07	9.40262e+06	8.34421e+06	1.38333e+07	1.83796e+07	1.71044e+07	2.40981e+07	2.17946e+07	1.69665e+07	1.28959e+07	3.64465e+07	3.5426e+07	1.44468e+07	1.75214e+07	1.60716e+07
P18292	7	7	654.71	0.0011682	3.76	Young	Old	Prothrombin OS=Rattus norvegicus GN=F2 PE=1 SV=1	19	12	22	23	5	14	18	27	28	7	8	5	5	9	9	7	0	15	2.12716e+07	1.31396e+07	1.30661e+07	1.2441e+07	5.50451e+06	2.18123e+07	3.29834e+07	3.8826e+07	5.13209e+07	4.12717e+06	4.47912e+06	1.49904e+06	1.97227e+06	2.45558e+07	6.42488e+06	1.33336e+07	4.20404e+06	1.06956e+07
Q6IRK9	6	6	493.97	0.760994	1.08583	Old	Young	Carboxypeptidase Q OS=Rattus norvegicus GN=Cpq PE=1 SV=1	12	12	14	10	10	11	5	7	12	14	13	14	13	9	14	7	5	10	3.97388e+06	1.67962e+06	3.34209e+06	4.46584e+06	1.76753e+06	4.12596e+06	1.42925e+06	3.1858e+06	3.87971e+06	3.63676e+06	3.68312e+06	3.11468e+06	2.09542e+06	5.94622e+06	4.24489e+06	3.26801e+06	1.4054e+06	2.77892e+06
Q8CHN3	9	9	1014.88	0.20077	1.26433	Young	Old	WAP four-disulfide core domain protein 2 OS=Rattus norvegicus GN=Wfdc2 PE=2 SV=1	2	12	7	12	13	13	8	6	12	6	7	8	9	1	11	3	0	6	3.13568e+06	6.84349e+06	1.70773e+06	4.54733e+06	5.47043e+06	9.71186e+06	6.16732e+06	4.42258e+06	8.10264e+06	2.70703e+06	1.86164e+06	5.16246e+06	2.41452e+06	1.24945e+07	4.76419e+06	1.64518e+06	1.13636e+06	4.02803e+06
P14740	12	12	800.41	0.03279	1.55688	Young	Old	Dipeptidyl peptidase 4 OS=Rattus norvegicus GN=Dpp4 PE=1 SV=2	22	10	26	15	9	10	15	14	15	8	11	7	6	7	12	13	5	13	1.2721e+07	5.4812e+06	7.43848e+06	7.75975e+06	6.21495e+06	6.48724e+06	5.48691e+06	7.96338e+06	6.04732e+06	2.54336e+06	2.5172e+06	3.61124e+06	3.15345e+06	8.57567e+06	7.50018e+06	3.96827e+06	3.06686e+06	5.07061e+06
P00763	1	1	103.77	0.572948	1.55837	Young	Old	Anionic trypsin-2 OS=Rattus norvegicus GN=Prss2 PE=1 SV=2	19	10	21	24	10	28	12	11	20	12	6	8	10	10	13	10	4	21	6.29471e+06	8.55817e+06	4.53509e+06	8.56449e+06	8.06419e+06	1.10336e+07	6.4196e+06	6.91602e+06	6.92822e+06	2.9837e+06	3.26596e+06	2.35218e+06	3.01218e+06	9.94367e+06	4.87676e+06	4.31318e+06	4.74842e+06	7.65981e+06
P84855	4	1	428.48	0.063737	179.719	Young	Old	Major urinary protein (Fragments) OS=Rattus rattus PE=1 SV=2	0	10	1	13	9	0	0	0	0	0	0	1	2	0	0	0	1	2	4542.37	6.59362e+06	30898.7	1.43615e+07	4.92755e+06	15796	536.165	200.715	11716.8	8285.56	15803.6	18913.3	47110	0	22692.3	0	4434.69	27177.1
P36373	10	9	1052.92	0.742466	1.22532	Old	Young	Glandular kallikrein-7, submandibular/renal OS=Rattus norvegicus GN=Klk7 PE=1 SV=1	43	9	25	27	17	36	40	44	47	43	30	46	27	46	57	65	15	47	5.13462e+07	1.45298e+07	2.05291e+07	3.28404e+07	1.53719e+07	4.37098e+07	4.42305e+07	1.01353e+08	6.21517e+07	3.65018e+07	2.3159e+07	3.78486e+07	2.53693e+07	1.31696e+08	6.88241e+07	8.10568e+07	3.44196e+07	4.67507e+07
Q9EPB1	5	5	386.2	0.0387344	2.3827	Young	Old	Dipeptidyl peptidase 2 OS=Rattus norvegicus GN=Dpp7 PE=1 SV=1	21	9	15	13	10	12	27	30	24	11	9	8	9	7	17	6	0	17	1.39558e+07	2.64458e+06	7.81322e+06	3.83964e+06	2.73638e+06	5.17692e+06	1.77726e+07	1.60579e+07	1.61692e+07	3.86657e+06	3.33879e+06	4.83399e+06	3.10978e+06	2.76438e+06	6.32446e+06	4.8466e+06	791448	5.6116e+06
P22057	4	4	214.59	0.0221993	59.896	Young	Old	Prostaglandin-H2 D-isomerase OS=Rattus norvegicus GN=Ptgds PE=1 SV=2	0	9	1	9	9	0	0	0	0	0	0	0	0	0	0	0	0	0	28420.4	937669	139396	2.61374e+06	1.0605e+06	4721.27	10441.4	15468.3	38614.9	5962.87	11624.4	12545.7	27700.7	4.74697	14706.7	1563.73	12.8856	5838.74
P05545	13	7	1540.66	0.762248	1.19686	Young	Old	Serine protease inhibitor A3K OS=Rattus norvegicus GN=Serpina3k PE=1 SV=3	4	8	15	17	6	17	15	13	17	11	14	18	21	2	10	8	7	14	2.97619e+06	9.22387e+06	1.92283e+07	1.72799e+07	7.65762e+06	1.42573e+07	7.64127e+06	1.01213e+07	1.64057e+07	1.1927e+07	1.27647e+07	2.38798e+07	1.94376e+07	2.52308e+06	1.15538e+07	7.96445e+06	7.9613e+06	1.70751e+07
P04937	11	11	1013.72	0.000151599	4.20876	Young	Old	Fibronectin OS=Rattus norvegicus GN=Fn1 PE=1 SV=2	10	8	8	14	7	14	31	21	31	5	3	6	1	2	5	3	0	1	4.46911e+06	2.21756e+06	2.3686e+06	3.90391e+06	2.70708e+06	4.30913e+06	1.24424e+07	7.10192e+06	1.50848e+07	1.21962e+06	902783	1.16267e+06	686744	3.31708e+06	2.0154e+06	1.69793e+06	843415	1.27273e+06
Q6IMF3	9	6	752.03	0.0346659	1.5316	Young	Old	Keratin, type II cytoskeletal 1 OS=Rattus norvegicus GN=Krt1 PE=2 SV=1	6	8	6	6	7	12	5	8	9	12	13	11	6	6	11	7	1	14	6.8298e+06	1.28394e+07	7.79619e+06	5.72292e+06	1.38981e+07	1.365e+07	5.24799e+06	5.08095e+06	7.31745e+06	4.56982e+06	3.68006e+06	4.73316e+06	5.04242e+06	5.84113e+06	5.91465e+06	4.57684e+06	4.7467e+06	5.3874e+06
Q4FZU2	3	1	209.88	0.442309	1.38258	Young	Old	Keratin, type II cytoskeletal 6A OS=Rattus norvegicus GN=Krt6a PE=1 SV=1	2	8	5	1	3	6	5	2	7	0	1	1	1	1	2	1	0	2	2.06895e+06	1.52569e+06	1.37861e+06	808799	213776	2.0544e+06	1.15837e+06	745252	1.76075e+06	707473	643100	924207	530446	1.37193e+06	1.05323e+06	1.07528e+06	106231	2.08433e+06
P13635	18	17	1498.27	2.07613e-05	4.53405	Old	Young	Ceruloplasmin OS=Rattus norvegicus GN=Cp PE=1 SV=3	1	8	3	12	12	9	4	3	8	33	31	25	30	31	14	27	27	23	7.37751e+06	4.75566e+06	6.03493e+06	1.0511e+07	6.7509e+06	9.63425e+06	6.5247e+06	8.23694e+06	8.96009e+06	2.12931e+07	1.77287e+07	2.99902e+07	2.21849e+07	6.99396e+07	2.37823e+07	5.99405e+07	5.89164e+07	3.75285e+07
P07151	5	5	339.58	0.00473181	3.59754	Young	Old	Beta-2-microglobulin OS=Rattus norvegicus GN=B2m PE=1 SV=1	4	8	1	23	11	13	4	2	9	2	2	4	3	3	3	3	0	4	5.87432e+06	9.00148e+06	2.4427e+06	1.73707e+07	7.68641e+06	6.44744e+06	1.73253e+06	1.30451e+06	3.87121e+06	1.34387e+06	1.50913e+06	2.21863e+06	1.96659e+06	4.62543e+06	1.97074e+06	2.70031e+06	936315	2.54112e+06
P20760	21	15	2193.38	8.86207e-08	19.4458	Old	Young	Ig gamma-2A chain C region OS=Rattus norvegicus GN=Igg-2a PE=1 SV=1	13	7	13	15	4	6	3	1	6	126	128	147	132	147	140	209	198	107	9.02512e+06	2.1104e+07	1.05063e+07	9.59734e+06	1.13627e+07	7.31334e+06	6.86316e+06	6.37144e+06	7.8567e+06	9.29731e+07	9.29718e+07	1.16509e+08	9.51503e+07	4.5116e+08	1.19816e+08	4.51919e+08	6.76346e+08	1.12899e+08
P02764	6	6	453.24	0.0728599	1.67176	Old	Young	Alpha-1-acid glycoprotein OS=Rattus norvegicus GN=Orm1 PE=2 SV=1	0	7	1	10	7	0	1	1	2	8	16	6	12	6	4	4	3	2	17811.7	2.18338e+06	243698	3.1562e+06	1.91408e+06	65919.4	46181.5	35473	126461	803150	2.25982e+06	487434	1.61198e+06	5.34876e+06	396357	1.43588e+06	495286	86473.8
P32038	1	1	159.5	0.544722	1.37668	Old	Young	Complement factor D OS=Rattus norvegicus GN=Cfd PE=1 SV=2	1	7	1	10	6	12	19	11	19	18	16	11	9	11	11	32	7	13	2.10819e+07	2.39646e+06	1.31095e+07	5.94568e+06	2.63081e+06	3.60993e+06	6.84513e+06	5.82395e+06	9.99695e+06	4.99558e+06	6.46468e+06	3.94631e+06	4.49814e+06	6.07408e+06	5.07103e+06	1.72784e+07	2.84026e+07	3.81057e+06
Q63467	4	4	271.78	0.326082	2.21311	Young	Old	Trefoil factor 1 OS=Rattus norvegicus GN=Tff1 PE=3 SV=1	0	7	0	6	2	13	11	23	14	0	0	0	0	0	0	0	0	0	680482	1.97435e+06	224686	992789	943887	3.72165e+06	2.70316e+06	8.84626e+06	3.37233e+06	768170	572441	1.27765e+06	696465	1.17467e+06	1.21372e+06	2.11715e+06	107221	2.60906e+06
Q04807	4	4	333.98	0.0723985	3.49626	Young	Old	Glycosylation-dependent cell adhesion molecule 1 OS=Rattus norvegicus GN=Glycam1 PE=2 SV=1	4	6	7	3	7	1	1	3	2	3	7	2	3	0	2	1	0	0	4.69909e+06	4.18741e+06	4.28735e+06	349752	3.71016e+06	431630	1.9782e+06	4.39658e+06	6.01364e+06	2.75586e+06	2.61867e+06	726756	533101	28805.3	904488	908425	8948.76	90147.5
P23785	6	6	572.07	0.0562871	2.42906	Young	Old	Granulins OS=Rattus norvegicus GN=Grn PE=1 SV=3	3	6	3	12	5	5	9	14	16	4	8	5	10	5	2	4	3	0	4.09378e+06	2.69589e+06	2.68586e+06	3.55045e+06	3.24814e+06	5.41887e+06	1.64864e+07	2.50223e+07	2.04191e+07	1.85526e+06	2.09534e+06	1.6129e+06	1.58079e+06	1.03449e+07	2.98075e+06	8.23362e+06	3.32787e+06	3.15637e+06
P02767	2	2	257.01	0.136299	1.49797	Young	Old	Transthyretin OS=Rattus norvegicus GN=Ttr PE=1 SV=1	0	6	0	6	4	7	5	3	5	3	4	2	1	1	1	0	5	5	1.25883e+06	1.83712e+06	968186	1.18197e+06	1.27362e+06	2.44254e+06	1.51961e+06	762661	1.94167e+06	708817	593551	507339	429720	376091	581288	420886	3.55252e+06	1.0589e+06
P02650	11	10	724.48	0.516839	1.22169	Young	Old	Apolipoprotein E OS=Rattus norvegicus GN=Apoe PE=1 SV=2	19	5	17	3	5	9	8	15	7	9	5	8	9	1	11	5	0	7	1.04162e+07	3.78285e+06	8.53795e+06	3.49197e+06	3.64475e+06	4.33334e+06	4.03722e+06	5.29171e+06	3.84278e+06	4.77017e+06	4.27741e+06	4.63687e+06	3.91416e+06	3.84483e+06	5.36977e+06	5.49652e+06	1.16876e+06	4.48235e+06
P14046	34	10	2639.2	0.0121238	2.29486	Old	Young	Alpha-1-inhibitor 3 OS=Rattus norvegicus GN=A1i3 PE=1 SV=1	10	5	10	14	8	21	6	10	7	18	14	21	21	14	29	31	12	16	6.93545e+06	3.81743e+06	5.12043e+06	4.62289e+06	4.27012e+06	1.28697e+07	3.18595e+06	4.36511e+06	2.97368e+06	7.03285e+06	5.81822e+06	8.97881e+06	6.74198e+06	1.80424e+07	1.59592e+07	1.96749e+07	1.86798e+07	9.01866e+06
P10959	7	7	520.63	0.0068272	3.16382	Old	Young	Carboxylesterase 1C OS=Rattus norvegicus GN=Ces1c PE=1 SV=3	9	5	6	8	5	8	8	6	7	17	17	22	21	12	9	15	23	11	2.13311e+06	5.375e+06	1.61663e+06	4.95369e+06	5.23669e+06	2.89314e+06	2.07861e+06	1.72491e+06	2.58515e+06	4.75281e+06	3.94392e+06	5.66303e+06	4.55961e+06	1.8565e+07	2.6471e+06	1.30109e+07	3.05933e+07	4.12532e+06
P14730	1	1	172.31	0.000653025	7.85833	Young	Old	WAP four-disulfide core domain protein 18 (Fragment) OS=Rattus norvegicus GN=Wfdc18 PE=2 SV=2	1	5	0	6	6	7	3	4	5	0	0	0	0	0	0	0	0	0	846435	3.83437e+06	172015	3.2902e+06	3.58275e+06	2.28564e+06	1.07023e+06	1.71763e+06	3.78034e+06	464547	353912	401707	170292	393409	27891.5	627781	53609.3	163710
P10758	3	2	152.29	0.131499	1.79884	Young	Old	Lithostathine OS=Rattus norvegicus GN=Reg1 PE=1 SV=1	0	5	0	1	1	1	0	0	0	0	0	0	0	0	0	0	0	0	0	363555	1095.53	84207.8	55918.1	65412.6	3817.74	0	2309.06	0	1123.94	0	1565.79	0	9.93874	4742.9	0	5282.61
P15399	9	9	601.16	0.225073	3.05997	Young	Old	Probasin OS=Rattus norvegicus GN=Pbsn PE=1 SV=1	97	4	73	11	4	0	0	2	0	0	0	0	0	0	47	6	0	0	8.42085e+07	2.87925e+06	4.26645e+07	3.51319e+06	3.20845e+06	1.24469e+06	850717	1.18925e+06	1.23557e+06	650470	613838	995306	1.0931e+06	1.24803e+06	3.07216e+07	7.19866e+06	3.38513e+06	831208
P02781	4	4	265.52	0.807337	3.93684	Old	Young	Prostatic steroid-binding protein C2 OS=Rattus norvegicus GN=Psbpc2 PE=1 SV=1	11	4	18	1	4	2	11	5	2	7	10	5	6	9	2	0	8	2	4.55621e+06	3.02209e+06	3.1191e+06	1.34118e+06	3.469e+06	1.29103e+06	4.86208e+06	2.2446e+06	1.26054e+06	1.37243e+06	2.53858e+06	1.31228e+06	1.52876e+06	6.66019e+07	1.28197e+06	1.35755e+07	1.39827e+07	2.05828e+06
P26051	3	2	221.62	0.564433	1.33361	Young	Old	CD44 antigen OS=Rattus norvegicus GN=Cd44 PE=1 SV=2	5	4	9	8	1	6	9	10	11	6	7	6	11	10	6	12	8	7	2.55615e+06	674068	2.35243e+06	1.64535e+06	412194	1.18163e+06	1.19589e+07	9.7536e+06	5.8237e+06	2.1339e+06	2.63444e+06	1.88179e+06	2.15298e+06	9.12115e+06	1.75546e+06	3.53321e+06	1.58622e+06	2.1598e+06
P85971	6	6	453.22	0.594422	1.06569	Young	Old	6-phosphogluconolactonase OS=Rattus norvegicus GN=Pgls PE=1 SV=1	9	4	8	9	7	8	17	17	20	2	0	2	2	2	6	2	0	6	3.67115e+06	1.26419e+06	2.09381e+06	1.42603e+06	1.37082e+06	2.64294e+06	4.95626e+06	6.1202e+06	6.02493e+06	1.65615e+06	1.62579e+06	1.28397e+06	1.49972e+06	3.30303e+06	4.53363e+06	3.22852e+06	8.7201e+06	2.78725e+06
P23680	3	3	219.91	0.0111021	2.8981	Young	Old	Serum amyloid P-component OS=Rattus norvegicus GN=Apcs PE=2 SV=2	7	4	5	3	3	4	8	5	11	3	3	3	2	2	4	3	0	4	2.03071e+06	686599	1.68899e+06	954534	706342	1.78028e+06	3.04897e+06	1.86394e+06	5.31444e+06	578896	598410	601399	548644	736416	707967	915846	168597	1.48083e+06
P29598	6	6	592.64	0.397386	1.64324	Young	Old	Urokinase-type plasminogen activator OS=Rattus norvegicus GN=Plau PE=1 SV=1	2	4	3	7	3	3	6	7	5	4	6	5	10	0	7	2	0	5	4.89809e+06	618931	948724	2.37905e+06	548421	2.26702e+06	1.93302e+06	4.20424e+06	2.10189e+06	1.17068e+06	781909	1.47533e+06	828326	1.08698e+06	2.51217e+06	587064	160605	2.73526e+06
P07861	10	10	891.38	0.0919388	1.42392	Young	Old	Neprilysin OS=Rattus norvegicus GN=Mme PE=1 SV=2	23	3	15	4	2	7	12	7	6	7	6	3	5	6	3	4	1	4	9.11362e+06	2.29039e+06	6.66264e+06	3.05541e+06	2.28519e+06	2.97719e+06	2.91648e+06	2.75129e+06	2.15621e+06	1.8222e+06	2.07719e+06	1.4826e+06	1.54012e+06	8.24223e+06	1.97717e+06	2.56729e+06	5.68811e+06	1.20419e+06
Q6DGG1	5	5	491.3	0.462642	1.16157	Young	Old	Alpha/beta hydrolase domain-containing protein 14B OS=Rattus norvegicus GN=Abhd14b PE=2 SV=1	9	3	7	8	4	14	11	8	6	7	4	6	3	1	5	5	0	7	4.32587e+06	1.42431e+06	2.96269e+06	1.77672e+06	1.51461e+06	2.86998e+06	2.97631e+06	4.35957e+06	2.54977e+06	1.59909e+06	1.45545e+06	1.08805e+06	1.06101e+06	3.79827e+06	2.07027e+06	2.55243e+06	4.41049e+06	2.8089e+06
Q499T2	2	2	253.55	0.408589	1.15559	Old	Young	Gamma-interferon-inducible lysosomal thiol reductase OS=Rattus norvegicus GN=Ifi30 PE=2 SV=1	12	3	4	1	2	1	8	5	7	6	5	8	6	3	11	4	1	6	2.38e+06	620681	833067	176725	420496	1.08412e+06	3.43278e+06	5.09736e+06	2.4771e+06	1.06225e+06	777154	1.14245e+06	564147	4.16485e+06	1.50262e+06	3.05483e+06	5.27994e+06	1.19243e+06
P0CG51	2	2	110.93	0.0906273	2.58071	Young	Old	Polyubiquitin-B OS=Rattus norvegicus GN=Ubb PE=1 SV=1	4	3	2	4	3	4	3	0	3	0	2	3	2	1	2	0	0	2	2.08377e+06	859707	1.79707e+06	1.47636e+06	4.27612e+06	2.01623e+06	1.17721e+06	46845	1.43634e+06	313634	342676	481560	598896	1.79067e+06	795410	207973	135362	823099
P31211	3	3	164.65	0.360795	1.56841	Old	Young	Corticosteroid-binding globulin OS=Rattus norvegicus GN=Serpina6 PE=1 SV=2	1	3	2	2	4	3	7	4	6	3	4	4	4	0	2	5	2	3	2.25931e+06	396134	959293	1.03264e+06	498727	911899	2.02558e+06	1.87434e+06	1.85148e+06	1.28702e+06	936249	1.34909e+06	951211	5.91656e+06	1.37981e+06	2.8718e+06	2.79544e+06	1.04923e+06
P04764	5	5	420.58	0.0167835	4.67777	Old	Young	Alpha-enolase OS=Rattus norvegicus GN=Eno1 PE=1 SV=4	0	3	1	3	1	3	1	0	3	3	1	0	0	0	9	0	0	0	398514	261601	254065	348336	212306	714164	534652	82266.6	397304	1.43015e+06	1.06075e+06	1.19783e+06	791921	1.06546e+06	4.69084e+06	2.60662e+06	31223.1	1.90983e+06
P13852	2	2	206.79	0.0513397	2.0813	Young	Old	Major prion protein OS=Rattus norvegicus GN=Prnp PE=1 SV=2	1	3	1	1	2	0	0	0	3	2	2	2	1	0	0	0	0	0	799665	343431	154928	391955	275008	488596	573182	589724	1.05344e+06	260988	202740	401487	232032	3582.1	440713	282414	93361.5	527045
P63102	2	1	153.46	0.262207	1.37303	Old	Young	14-3-3 protein zeta/delta OS=Rattus norvegicus GN=Ywhaz PE=1 SV=1	2	3	1	1	2	1	1	1	1	0	0	0	0	0	1	0	0	0	1.30541e+06	900064	2.09169e+06	520729	738737	988871	2.1353e+06	1.12489e+06	1.63317e+06	2.63459e+06	2.73634e+06	2.92241e+06	2.81434e+06	208.262	1.53691e+06	74648.5	16.6709	2.94952e+06
P20761	8	8	840.09	0.00404665	14.9266	Old	Young	Ig gamma-2B chain C region OS=Rattus norvegicus GN=Igh-1a PE=1 SV=1	0	3	0	6	0	3	3	3	1	14	9	6	3	3	10	24	49	10	1.48759e+06	2.41157e+06	1.00423e+06	2.78116e+06	2.53152e+06	2.55899e+06	2.46101e+06	3.62224e+06	1.32193e+06	7.29091e+06	6.60228e+06	3.02081e+06	2.31003e+06	1.35779e+07	9.3969e+06	3.64925e+07	2.45244e+08	7.16702e+06
O88778	2	2	36.07	0.0417058	3.22052	Young	Old	Protein bassoon OS=Rattus norvegicus GN=Bsn PE=1 SV=3	0	3	0	1	0	0	0	0	1	0	0	0	0	0	0	0	0	0	7.0968e+06	561423	2.02973e+06	1.60452e+06	551338	3.02617e+06	4.2225e+06	3.07044e+06	3.97461e+06	241599	324377	328582	357248	1.30801e+06	574366	983425	355085	964496
O35568	8	8	697.22	0.0611535	2.97154	Young	Old	EGF-containing fibulin-like extracellular matrix protein 1 OS=Rattus norvegicus GN=Efemp1 PE=1 SV=1	2	3	0	23	6	11	12	15	13	5	3	3	2	3	4	5	0	13	1.52647e+06	2.03681e+06	880887	4.32425e+06	2.24363e+06	3.77059e+06	9.83126e+06	1.00261e+07	1.22846e+07	1.89687e+06	1.66433e+06	1.75667e+06	1.04053e+06	2.39889e+06	1.18268e+06	2.22412e+06	775498	2.85746e+06
Q6IG02	3	3	184.98	0.289466	8.31576	Young	Old	Keratin, type II cytoskeletal 2 epidermal OS=Rattus norvegicus GN=Krt2 PE=2 SV=1	1	3	0	2	2	0	0	0	0	0	0	0	0	0	0	1	0	0	227578	932361	62050.3	455308	636279	11169	0	22129.3	3068.16	7638.3	35804.1	11953.3	45107.4	0	19822.3	120035	0	36823.6
P01835	14	8	1906.92	0.0159684	3.73992	Old	Young	Ig kappa chain C region, B allele OS=Rattus norvegicus PE=1 SV=1	52	2	68	61	4	2	81	93	84	175	184	164	160	32	136	95	17	151	2.20063e+08	9.67051e+06	1.40249e+08	2.23744e+08	9.19277e+06	1.32828e+07	4.55209e+08	5.45556e+08	6.368e+08	1.04026e+09	8.97625e+08	1.38092e+09	9.18954e+08	9.09591e+07	1.42887e+09	1.49498e+09	6.60116e+07	1.08793e+09
P28826	10	10	908.6	0.212607	1.38894	Young	Old	Meprin A subunit beta OS=Rattus norvegicus GN=Mep1b PE=1 SV=3	23	2	19	15	2	17	9	9	13	6	5	3	1	3	12	5	0	7	9.96479e+06	3.45593e+06	6.29585e+06	5.50005e+06	2.51195e+06	6.17672e+06	2.64035e+06	3.5342e+06	3.55458e+06	1.72169e+06	1.52303e+06	1.68702e+06	1.52442e+06	5.23557e+06	3.38477e+06	4.77154e+06	1.03936e+06	2.98671e+06
P50123	7	7	441.97	0.0565684	3.52878	Young	Old	Glutamyl aminopeptidase OS=Rattus norvegicus GN=Enpep PE=1 SV=2	9	2	15	7	2	10	4	3	7	4	5	1	1	2	6	0	0	0	5.20777e+06	1.09156e+06	2.79637e+06	2.08643e+06	704581	1.37833e+06	1.58575e+06	1.19449e+06	1.5252e+06	653581	866473	675041	431996	468233	658874	170793	367039	603998
P19468	9	9	379.51	0.0214645	1.65152	Young	Old	Glutamate--cysteine ligase catalytic subunit OS=Rattus norvegicus GN=Gclc PE=1 SV=2	13	2	13	10	4	8	0	1	3	0	0	0	0	0	0	0	0	0	3.19464e+06	708810	2.01764e+06	1.77886e+06	944176	2.08318e+06	335530	650551	519770	133810	237651	174930	181985	717507	288066	286030	568363	590548
P01015	6	5	452.47	0.863555	1.70787	Old	Young	Angiotensinogen OS=Rattus norvegicus GN=Agt PE=1 SV=1	4	2	6	3	6	4	0	1	2	3	3	1	3	4	1	4	1	3	1.36085e+06	417511	781181	672037	717018	562173	63450	115560	105762	227583	121490	262133	163484	1.3421e+06	208919	3.1863e+06	2.42457e+06	338144
P09006	7	7	556.93	0.0062826	6.40675	Old	Young	Serine protease inhibitor A3N OS=Rattus norvegicus GN=Serpina3n PE=1 SV=3	5	2	3	4	2	6	5	4	4	11	10	5	5	20	7	5	29	15	2.04382e+06	1.33102e+06	1.16818e+06	2.11577e+06	1.65897e+06	2.58538e+06	1.51217e+06	2.74587e+06	1.561e+06	2.62844e+06	2.63279e+06	2.03514e+06	1.9971e+06	2.02012e+07	3.77368e+06	6.50198e+06	6.14004e+07	4.91892e+06
Q9JJ19	6	6	307.62	0.0311048	3.24152	Young	Old	Na(+)/H(+) exchange regulatory cofactor NHE-RF1 OS=Rattus norvegicus GN=Slc9a3r1 PE=1 SV=3	10	2	3	7	4	13	1	3	1	0	0	0	0	0	5	1	0	1	3.25617e+06	430527	1.87029e+06	1.88402e+06	458634	2.06062e+06	564264	554910	433674	259604	209290	220737	129525	154024	731850	1.03503e+06	495847	326937
O88989	3	3	191.13	0.0892055	1.28735	Old	Young	Malate dehydrogenase, cytoplasmic OS=Rattus norvegicus GN=Mdh1 PE=1 SV=3	3	2	2	7	2	0	1	1	2	4	2	1	0	0	0	0	0	0	499176	431875	412900	1.0699e+06	430538	129625	253476	325965	319187	414970	447193	134484	61026.2	5216.36	24669.5	32208.5	15778.1	36131.4
P31977	6	3	355.64	0.514362	2.73669	Young	Old	Ezrin OS=Rattus norvegicus GN=Ezr PE=1 SV=3	0	2	2	1	1	0	0	0	0	0	1	0	0	0	0	0	0	0	9.58586	87917.3	274386	134350	137696	190704	188185	3539.57	5529.95	22569.5	51430.8	7494.43	31743.1	223887	17156.2	4283.42	7263.04	8148.05
Q01460	5	5	462.05	0.570139	1.13683	Old	Young	Di-N-acetylchitobiase OS=Rattus norvegicus GN=Ctbs PE=1 SV=1	0	2	2	4	0	4	3	1	2	5	7	5	7	0	5	0	0	2	459859	566307	829944	1.55175e+06	516842	1.66055e+06	618360	518394	1.81389e+06	2.20342e+06	1.68562e+06	1.39224e+06	1.14166e+06	160501	2.59807e+06	69368.6	380551	1.39118e+06
P97546	3	3	236.13	0.644012	1.18446	Young	Old	Neuroplastin OS=Rattus norvegicus GN=Nptn PE=1 SV=2	0	2	2	1	2	0	4	6	4	3	5	3	3	1	2	0	2	2	136874	567718	343263	277990	543214	808751	1.98036e+06	3.59401e+06	2.68958e+06	1.6117e+06	1.01139e+06	1.39658e+06	733595	1.25864e+06	984816	373063	649784	1.53068e+06
Q9QX79	12	12	775.34	0.856813	1.01113	Old	Young	Fetuin-B OS=Rattus norvegicus GN=Fetub PE=2 SV=2	1	2	2	9	4	10	18	9	11	9	15	9	5	5	5	0	0	13	581308	744995	525950	1.47067e+06	1.20986e+06	2.44398e+06	4.32751e+06	3.28909e+06	3.21196e+06	2.73376e+06	2.33325e+06	1.77519e+06	1.48914e+06	4.83946e+06	1.576e+06	718664	689800	3.12167e+06
Q9JIK1	3	3	173.03	0.161943	1.78919	Young	Old	Cadherin-related family member 5 OS=Rattus norvegicus GN=Cdhr5 PE=1 SV=1	3	2	1	2	0	2	5	5	5	0	0	2	1	0	0	1	0	0	2.12826e+06	611285	1.12845e+06	643476	423572	1.22909e+06	1.08444e+06	1.79669e+06	1.09231e+06	901762	815795	766373	607335	263746	1.28798e+06	689615	24666.6	337863
Q9WUC4	4	4	296.16	0.127953	1.89139	Young	Old	Copper transport protein ATOX1 OS=Rattus norvegicus GN=Atox1 PE=1 SV=1	0	2	0	2	5	5	14	7	11	0	0	3	1	2	1	2	0	1	191728	344029	175835	289363	478358	422183	1.98815e+06	1.27856e+06	1.44202e+06	128020	118301	234198	278531	1.01113e+06	227625	857318	431415	170508
O70417	5	5	128.92	0.603996	1.53114	Young	Old	Prolactin-inducible protein homolog OS=Rattus norvegicus GN=Pip PE=2 SV=1	0	2	0	2	3	1	0	1	1	1	4	1	2	0	0	0	0	0	26036.3	347005	19302.3	152471	249022	163370	441.851	187956	228620	109442	204480	71596.3	119089	38149.1	2918.21	5469.91	284375	11244
P06911	2	2	96.28	0.778195	3.78647	Old	Young	Epididymal-specific lipocalin-5 OS=Rattus norvegicus GN=Lcn5 PE=1 SV=2	0	2	0	0	0	0	0	0	0	0	0	0	0	1	0	0	0	0	7488.68	37712.3	64.6255	7730.14	12112.3	18289.1	340.659	1476.68	1551.56	10053.6	2938.36	2384.74	8173.08	141495	11893.5	52600.4	183763	5231.22
P60711	11	4	783.39	0.255566	1.31777	Young	Old	Actin, cytoplasmic 1 OS=Rattus norvegicus GN=Actb PE=1 SV=1	3	1	15	7	4	5	7	4	3	3	3	1	0	2	6	4	1	4	3.61913e+06	1.08241e+06	5.01796e+06	6.34641e+06	1.18728e+06	4.9871e+06	2.07667e+06	2.75648e+06	1.85433e+06	1.36668e+06	1.84464e+06	1.00336e+06	1.29056e+06	3.54654e+06	2.2015e+06	6.83185e+06	2.52085e+06	2.49547e+06
P05371	5	5	624.98	0.35738	1.40302	Old	Young	Clusterin OS=Rattus norvegicus GN=Clu PE=1 SV=2	7	1	11	6	2	5	4	8	8	9	13	8	10	4	5	20	0	1	4.0531e+06	464490	3.85488e+06	836894	585916	1.0412e+06	1.76471e+06	2.48497e+06	2.55321e+06	3.42711e+06	3.65268e+06	1.95232e+06	2.04084e+06	7.57439e+06	3.51425e+06	9.33786e+06	3.2753e+06	1.72811e+06
Q9JJ40	8	8	381.84	0.000945792	3.83696	Young	Old	Na(+)/H(+) exchange regulatory cofactor NHE-RF3 OS=Rattus norvegicus GN=Pdzk1 PE=1 SV=2	11	1	8	8	1	3	2	2	3	0	0	0	0	0	0	3	0	2	3.35425e+06	647079	1.5643e+06	2.84913e+06	740734	2.25654e+06	339108	369134	747699	164516	101594	107339	155738	253181	289067	1.69702e+06	251223	650291
Q62867	5	5	230.15	0.214265	1.40036	Young	Old	Gamma-glutamyl hydrolase OS=Rattus norvegicus GN=Ggh PE=1 SV=1	6	1	7	2	1	2	7	2	6	0	1	0	0	4	0	1	0	0	1.80469e+06	319583	1.54524e+06	636994	399530	477744	1.00055e+06	162155	541386	186207	232678	190854	164557	1.35017e+06	1.02484e+06	2.47872e+06	703574	371145
P63018	6	6	450.52	0.712668	1.51531	Old	Young	Heat shock cognate 71 kDa protein OS=Rattus norvegicus GN=Hspa8 PE=1 SV=1	6	1	7	7	1	7	1	0	1	1	3	1	1	0	6	0	0	1	3.35917e+06	6.96285e+06	2.23911e+06	1.13829e+07	7.13461e+06	1.68741e+07	5.57349e+06	8.25549e+06	5.77498e+06	3.48768e+06	3.00405e+06	2.55798e+06	2.42397e+06	6.09067e+07	5.73981e+06	1.51365e+07	2.50693e+06	9.27296e+06
P15978	7	7	426.49	0.710563	1.13833	Old	Young	Class I histocompatibility antigen, Non-RT1.A alpha-1 chain OS=Rattus norvegicus GN=RT1-Aw2 PE=1 SV=1	4	1	6	10	0	2	3	2	4	11	12	6	4	3	1	4	2	3	1.22594e+06	687778	1.07002e+06	4.07736e+06	781524	410829	981261	1.77867e+06	1.24883e+06	2.8078e+06	3.18673e+06	2.14092e+06	1.80514e+06	2.54129e+06	584280	876034	860627	1.70378e+06
P24268	5	5	202.69	0.0368385	2.2853	Young	Old	Cathepsin D OS=Rattus norvegicus GN=Ctsd PE=1 SV=1	0	1	4	0	0	0	3	1	0	0	0	0	0	0	0	0	0	0	169955	120503	539382	405983	44814.6	209769	296440	190770	84850	103284	162055	146354	159312	12757.7	139372	352835	5693.35	73331.7
P27274	1	1	86.56	0.433545	1.61484	Young	Old	CD59 glycoprotein OS=Rattus norvegicus GN=Cd59 PE=1 SV=2	4	1	4	2	2	5	11	4	9	7	6	7	6	2	7	0	2	5	3.40676e+06	1.96702e+06	1.53034e+06	3.07564e+06	2.24247e+06	3.99668e+06	3.60787e+06	1.15264e+06	4.57398e+06	1.70747e+06	1.38693e+06	1.97975e+06	1.11444e+06	2.33795e+06	2.13531e+06	43418.9	1.17749e+06	3.94206e+06
Q5QSK2	1	1	34.78	0.902625	1.60614	Old	Young	Transmembrane protease serine 11G OS=Rattus norvegicus GN=Tmprss11g PE=2 SV=1	6	1	3	1	2	2	2	3	2	9	2	2	2	3	5	0	0	2	1.12814e+06	30272.6	535512	157935	62522.9	321293	239805	219435	324468	593292	523660	479587	283474	2.46186e+06	419894	2200.87	12428.9	73162.2
P29975	2	2	182.03	0.000133309	7.85219	Young	Old	Aquaporin-1 OS=Rattus norvegicus GN=Aqp1 PE=2 SV=4	3	1	2	1	1	1	0	0	0	cc	0	0	1	0	0	0	0	0	893502	226835	453096	351023	201883	587184	125073	94035.6	320537	57476	79686.4	45682.7	71460.9	15956.5	41319.4	158482	6256.9	74386.8
Q642A7	1	1	62.3	0.170397	3.43152	Young	Old	Protein FAM151A OS=Rattus norvegicus GN=Fam151a PE=2 SV=1	1	1	2	3	0	2	6	8	6	1	0	0	1	0	0	2	0	0	69016.6	90545.3	67562.3	117472	88705	80434.5	358666	679621	399027	45950.5	43121.8	75214	112063	5564.48	107690	119465	38065.3	21875.8
O35217	2	2	74.99	0.244747	3.64219	Young	Old	Multiple inositol polyphosphate phosphatase 1 OS=Rattus norvegicus GN=Minpp1 PE=1 SV=3	1	1	2	1	1	0	0	0	0	0	0	0	0	0	0	0	0	0	1.45697e+06	71284.2	251831	83611.2	124555	18711.7	17309.8	6775.89	82897	29374.4	49063.1	61871.8	63627.7	0	142063	96981.6	3167.63	132160
O08837	1	1	43.66	0.641108	2.19792	Old	Young	Cell division cycle 5-like protein OS=Rattus norvegicus GN=Cdc5l PE=1 SV=2	0	1	2	2	0	1	1	1	7	6	6	3	6	1	4	3	1	3	1.99409e+06	1.69509e+06	1.13371e+06	1.79459e+06	1.01285e+06	691093	250195	602161	2.38104e+06	4.63884e+06	5.74376e+06	6.28022e+06	4.86527e+06	361148	1.36564e+06	820741	295322	1.02533e+06
P08721	3	3	331.29	0.695102	2.29523	Young	Old	Osteopontin OS=Rattus norvegicus GN=Spp1 PE=1 SV=2	5	1	2	2	1	1	5	3	5	0	0	0	0	0	0	0	0	0	1.57077e+06	648154	479749	724696	542035	588131	9.70809e+06	1.24869e+06	7.34375e+06	554984	482401	1.46735e+06	930611	76141	1.10692e+06	2.07868e+06	109034	2.05126e+06
P20611	7	7	350.35	0.934216	1.03209	Young	Old	Lysosomal acid phosphatase OS=Rattus norvegicus GN=Acp2 PE=1 SV=1	7	1	2	2	1	9	13	12	9	3	1	1	1	1	10	3	0	4	1.84887e+06	589176	861856	627616	1.66726e+06	1.12919e+06	2.42954e+06	2.47713e+06	2.48133e+06	687877	556472	806716	728543	2.82256e+06	1.37471e+06	1.9762e+06	302288	677572
P01048	22	6	2652.18	6.64208e-06	9.03242	Old	Young	T-kininogen 1 OS=Rattus norvegicus GN=Map1 PE=1 SV=2	0	1	1	4	1	3	2	4	5	50	51	45	41	83	39	60	49	21	2.95123e+06	2.99433e+06	4.98162e+06	4.95424e+06	2.38728e+06	3.68088e+06	3.48124e+06	3.49182e+06	3.8716e+06	2.09057e+07	2.04276e+07	1.71526e+07	1.89808e+07	1.64914e+08	1.69404e+07	6.24358e+07	5.98341e+07	1.74313e+07
P23764	2	2	115.55	0.354038	1.54702	Old	Young	Glutathione peroxidase 3 OS=Rattus norvegicus GN=Gpx3 PE=2 SV=2	0	1	1	3	1	1	1	1	1	1	2	1	3	1	2	0	0	0	299756	393327	178031	616372	373536	370514	193854	315604	239781	325714	338717	456105	327633	1.04372e+06	434858	129368	1.16319e+06	364791
Q6AYD4	3	3	368.28	0.512719	5.30231	Old	Young	Endothelial cell-selective adhesion molecule OS=Rattus norvegicus GN=Esam PE=2 SV=1	0	1	1	2	2	0	2	3	1	2	0	4	0	0	2	1	0	2	219407	295313	338516	567493	344937	178920	233488	615464	133114	396332	259171	559929	285486	0	440750	299891	83067	726483
P10960	4	4	274.75	0.623047	2.92195	Young	Old	Sulfated glycoprotein 1 OS=Rattus norvegicus GN=Psap PE=1 SV=1	1	1	1	1	1	4	23	28	21	0	2	11	7	6	2	4	1	0	1.05017e+06	754247	316246	1.32964e+06	516114	2.87613e+06	1.26387e+07	7.91387e+06	1.14981e+07	467475	474222	1.44484e+06	916088	3.66715e+06	880160	2.91105e+06	815902	599903
P04797	3	3	183.68	0.676131	1.47551	Young	Old	Glyceraldehyde-3-phosphate dehydrogenase OS=Rattus norvegicus GN=Gapdh PE=1 SV=3	2	1	1	4	1	4	1	0	3	0	0	0	0	0	0	0	1	1	544242	272989	432247	821467	320038	700353	311226	103309	351191	226647	241807	126507	94295.9	551260	233463	300719	123731	349613
P38438	1	1	63.77	0.0142773	2.70586	Young	Old	TGF-beta receptor type-2 OS=Rattus norvegicus GN=Tgfbr2 PE=2 SV=1	0	1	0	1	0	0	1	0	0	0	0	0	0	0	0	0	0	0	76828.6	134976	19316.4	145489	44320.1	214654	230230	166038	177797	36997.9	47223.5	95127.3	65778.8	112028	9494.4	3421.67	5995.44	60623
P31044	3	3	271.23	0.0290046	3.28112	Old	Young	Phosphatidylethanolamine-binding protein 1 OS=Rattus norvegicus GN=Pebp1 PE=1 SV=3	0	1	0	1	2	0	0	4	0	0	0	0	0	2	0	0	0	0	136900	325101	123748	108338	425444	131867	117087	776547	102948	401771	261141	184728	225779	3.9013e+06	388416	577861	1.01269e+06	258958
Q62962	1	1	14.86	0.0402719	17.4303	Young	Old	Acid-sensing ion channel 2 OS=Rattus norvegicus GN=Asic2 PE=1 SV=1	0	1	0	1	0	0	0	0	0	0	0	0	0	0	0	0	0	0	19027.6	3.95928e+06	1.18735e+06	1.45002e+07	2.72101e+06	1.41886e+06	15945.5	35612.8	24552.2	160805	320402	295573	435083	63.5445	118337	2604.12	221.732	41378.3
Q9QUL6	1	1	26.71	0.047559	3.65836	Old	Young	Vesicle-fusing ATPase OS=Rattus norvegicus GN=Nsf PE=1 SV=1	0	1	0	1	2	0	0	0	0	1	1	0	4	0	0	0	0	0	40183.9	77862.4	22988.2	429420	87398.4	187149	1.25933e+06	2.23767e+06	35549	4.82284e+06	3.50135e+06	3.03524e+06	2.16339e+06	346983	395455	85654	1.444e+06	338015
O70594	1	1	36.64	0.127198	3.89403	Young	Old	Solute carrier family 22 member 5 OS=Rattus norvegicus GN=Slc22a5 PE=1 SV=1	0	1	0	0	1	0	0	0	0	0	0	0	0	0	0	0	0	0	259142	1.08096e+07	295183	4.07665e+07	1.21954e+07	939856	393240	265555	236819	416957	177188	678038	592152	1.44028e+07	244848	88026.4	81055.3	161595
Q04462	1	1	42.01	0.248407	37.2092	Young	Old	Valine--tRNA ligase OS=Rattus norvegicus GN=Vars PE=2 SV=2	0	1	0	1	3	0	0	0	0	0	0	0	0	0	0	0	0	0	184.221	906212	29605	2.04608e+06	741014	3992.86	0	1.87021	1643.61	416.88	10712.3	4296.14	8035.82	13.8836	178.055	0	28.6037	118.637
P04276	12	12	970.86	0.299146	1.60702	Old	Young	Vitamin D-binding protein OS=Rattus norvegicus GN=Gc PE=1 SV=3	2	1	0	6	3	14	11	12	8	3	4	2	2	4	2	32	7	6	741317	1.19399e+06	390734	2.09575e+06	1.10661e+06	5.24569e+06	4.29697e+06	3.51105e+06	3.28963e+06	1.77142e+06	1.75477e+06	1.06414e+06	872876	3.98535e+06	2.1938e+06	1.34764e+07	6.99627e+06	1.833e+06
P04073	2	2	181.24	0.32393	1.21672	Young	Old	Gastricsin OS=Rattus norvegicus GN=Pgc PE=1 SV=1	1	1	0	2	1	0	2	0	3	0	0	0	0	0	7	0	0	1	411803	198170	259322	586608	242345	481353	623728	293173	467888	416726	78795.3	205680	117766	207295	933422	399699	709953	595970
Q5U300	1	1	21.41	0.373799	1.24567	Young	Old	Ubiquitin-like modifier-activating enzyme 1 OS=Rattus norvegicus GN=Uba1 PE=1 SV=1	0	1	0	0	0	0	0	0	0	0	0	0	0	0	0	0	0	0	791527	1.04114e+06	213651	628805	962813	736626	57923.2	44472.3	909015	1.08782e+06	978748	1.18078e+06	590862	4195.78	282964	0	1498.97	196887
Q6P6Q2	6	3	258.61	0.391629	1.40054	Young	Old	Keratin, type II cytoskeletal 5 OS=Rattus norvegicus GN=Krt5 PE=1 SV=1	0	1	0	0	0	1	0	0	0	1	0	0	0	0	0	0	0	0	59664.2	117486	40848	43787.8	78190.3	86086	23555.2	121662	641.004	86534.7	15919.8	97711.8	17323.5	26.1134	114686	21952.7	37041.8	5536.5
P12020	3	2	84.07	0.426882	1.38288	Young	Old	Cysteine-rich secretory protein 1 OS=Rattus norvegicus GN=Crisp1 PE=2 SV=1	0	1	0	0	1	1	0	0	0	0	0	0	0	0	0	0	0	0	50550.1	251944	46404.4	137648	195377	286870	8439.02	12345.9	42203.1	46659.2	17198.4	15905.5	5141.99	428674	61289.8	58442	51022.8	64551
Q5FVF9	4	4	367.04	0.672109	1.17688	Young	Old	Biotinidase OS=Rattus norvegicus GN=Btd PE=2 SV=1	5	1	0	4	2	4	3	20	10	1	2	1	1	7	6	3	1	1	1.38852e+06	694047	715997	818956	704062	536813	793787	2.08801e+06	1.2885e+06	604642	423562	365706	401617	1.55288e+06	904021	1.04929e+06	1.61926e+06	736244
P80254	1	1	46.81	0.722615	2.47347	Old	Young	D-dopachrome decarboxylase OS=Rattus norvegicus GN=Ddt PE=1 SV=3	0	1	0	0	1	0	0	0	0	0	0	0	0	0	0	0	0	0	18972.2	29943.3	17775	16692.2	56134.9	6464.03	132.823	2003.42	1682.31	15698.1	2731.45	8166.01	4155.37	0	20349	242710	4693.69	68687.2
D4A615	1	1	18.61	0.7688	2.58717	Young	Old	Tonsoku-like protein OS=Rattus norvegicus GN=Tonsl PE=3 SV=1	0	1	0	0	0	0	0	0	0	0	0	0	0	0	0	0	0	0	0	48300	1446.95	39344.6	55403.2	0	0	1005.59	0	0	16454.5	8473.18	19345.2	5354.43	975.098	0	5636.74	0
Q5BJX5	1	1	15.17	0.927878	26.648	Old	Young	Protein FAM110B OS=Rattus norvegicus GN=Fam110b PE=2 SV=1	0	1	0	0	0	0	0	0	0	0	0	0	0	0	0	0	0	0	8908.12	9191.47	8398.94	2.27052	7021.45	0	0	0	0	0	0	1041.84	0	4356.89	699.161	0	887203	0
B0BNN3	1	1	90.67	0.933255	1.54085	Young	Old	Carbonic anhydrase 1 OS=Rattus norvegicus GN=Ca1 PE=1 SV=1	0	1	0	2	2	1	0	0	0	0	0	2	0	0	0	0	0	0	67813.4	849270	43688.7	425790	829574	221085	24303.8	13855.7	33112.8	79895.2	92060	281649	296089	80260.6	154425	819471	102183	65534.2
P97580	8	7	558.72	0.0342542	2.61881	Young	Old	Beta-microseminoprotein OS=Rattus norvegicus GN=Msmb PE=1 SV=1	10	0	11	3	0	0	0	0	0	0	1	0	1	0	20	3	0	0	7.13011e+06	342383	3.08264e+06	1.15882e+06	292660	369905	1.3437e+06	725032	865567	339245	391734	426193	422972	66606.3	6.81212e+06	550140	70672.4	82669.2
Q03191	1	1	84.87	0.00115336	19.6655	Young	Old	Trefoil factor 3 OS=Rattus norvegicus GN=Tff3 PE=1 SV=1	3	0	8	2	0	8	7	11	12	0	0	0	0	0	0	1	0	0	1.52994e+06	225699	976009	552900	357819	2.80336e+06	3.07582e+06	2.57185e+07	1.79919e+07	36632.9	406758	93471	251108	2938.15	113455	1.75768e+06	375.971	81363.3
P19218	9	9	895.31	0.204334	4.929	Old	Young	Pancreatic secretory granule membrane major glycoprotein GP2 OS=Rattus norvegicus GN=Gp2 PE=1 SV=1	4	0	8	1	0	1	0	0	3	7	17	9	10	1	23	0	0	13	2.53176e+06	625990	1.33436e+06	727798	705829	356569	426969	639101	768902	4.76624e+06	4.6678e+06	3.40753e+06	2.8831e+06	574580	1.84089e+07	306869	26188.5	5.38797e+06
P10252	3	3	200.97	0.219716	1.2186	Young	Old	CD48 antigen OS=Rattus norvegicus GN=Cd48 PE=1 SV=1	2	0	8	5	0	2	6	2	2	1	2	2	3	2	2	2	0	0	729302	291743	673546	625063	366172	375760	672240	216804	726034	148780	127054	117622	200489	1.62657e+06	408317	1.10543e+06	2942.92	16681.4
Q6P7A9	5	5	376.09	0.0962876	1.34866	Young	Old	Lysosomal alpha-glucosidase OS=Rattus norvegicus GN=Gaa PE=2 SV=1	3	0	6	1	1	1	2	1	0	1	0	1	1	0	1	0	0	1	639757	251290	574467	228666	379942	264711	604867	305734	101992	170567	134754	122386	177268	1.20138e+06	330041	115998	8856.42	315230
Q63772	5	5	447.25	0.000429304	4.90527	Young	Old	Growth arrest-specific protein 6 OS=Rattus norvegicus GN=Gas6 PE=1 SV=1	4	0	5	0	0	0	2	2	2	0	0	0	0	0	0	0	0	2	479913	275644	615174	937090	196660	268931	332754	427625	450996	41096	52015.3	74276.2	97038.2	2704.84	141102	22155.2	31290.9	330209
Q03626	25	5	1971.26	0.48801	1.04288	Old	Young	Murinoglobulin-1 OS=Rattus norvegicus GN=Mug1 PE=2 SV=1	2	0	5	1	1	2	2	3	4	6	7	6	9	4	8	7	7	5	5.59261e+06	775816	3.58189e+06	1.40503e+06	2.09577e+06	1.85766e+06	8.65231e+06	2.25794e+06	3.32556e+06	3.30258e+06	3.10833e+06	2.73505e+06	3.0353e+06	3.45053e+06	4.03929e+06	4.27125e+06	4.7369e+06	2.50314e+06
O35763	8	5	573	0.920195	1.11155	Young	Old	Moesin OS=Rattus norvegicus GN=Msn PE=1 SV=3	2	0	4	3	0	1	0	0	0	1	0	0	0	0	1	0	0	0	483532	197545	420869	545578	124560	904907	31229.9	38354.6	250967	630934	856375	351819	445940	133229	1.51404e+06	297411	6863.23	284509
P01681	4	4	403.26	0.0123017	2.94568	Old	Young	Ig kappa chain V region S211 OS=Rattus norvegicus PE=1 SV=1	3	0	3	1	0	5	9	20	12	50	24	20	13	38	25	19	15	26	3.63751e+06	1.04389e+06	3.76119e+06	1.09254e+07	1.18332e+06	8.22217e+06	1.58867e+07	2.80185e+07	2.06017e+07	2.57096e+07	2.48398e+07	2.24105e+07	1.70017e+07	7.34818e+07	2.3701e+07	3.44142e+07	7.46798e+07	2.64785e+07
O70489	1	1	167.02	0.0589721	5.99904	Young	Old	Lysosomal thioesterase PPT2 OS=Rattus norvegicus GN=Ppt2 PE=2 SV=1	0	0	3	0	1	0	1	1	1	0	0	0	0	0	0	0	0	0	14337.2	892.455	264132	22900.9	85462.2	2087.15	84860.4	190303	66864.2	29916.8	4451.66	7329.34	2101.9	3324.97	31145.7	20498.6	0	26086.9
Q6IUU3	3	3	274.93	0.426565	1.43786	Young	Old	Sulfhydryl oxidase 1 OS=Rattus norvegicus GN=Qsox1 PE=1 SV=1	4	0	3	1	0	4	4	5	8	3	4	3	1	0	5	0	6	0	1.27881e+06	227734	860679	326121	116131	664398	871016	986716	947281	573795	391305	453585	285705	88624.2	888772	28690.8	1.31926e+06	320030
P00786	1	1	77.08	0.524775	2.18575	Old	Young	Pro-cathepsin H OS=Rattus norvegicus GN=Ctsh PE=1 SV=1	3	0	3	4	0	4	0	1	0	0	0	0	1	0	1	0	0	2	378910	208698	279999	452391	64538	312881	66520.2	241250	155424	221254	192905	153985	134765	2.76351e+06	240453	137133	524127	431244
Q812E9	2	2	128.95	0.681312	1.6521	Young	Old	Neuronal membrane glycoprotein M6-a OS=Rattus norvegicus GN=Gpm6a PE=1 SV=1	1	0	3	0	0	0	0	0	0	0	0	0	0	0	0	0	0	0	230961	48503.5	164246	115016	52810.7	7328.7	1972.92	2860.53	10136	10758.4	13930	9814.24	3819.77	282756	1686.65	27363.5	31365.6	2160.24
Q62930	5	5	420.12	0.83907	1.56842	Old	Young	Complement component C9 OS=Rattus norvegicus GN=C9 PE=2 SV=1	3	0	3	4	0	2	1	0	1	2	2	0	0	4	0	8	6	1	1.1492e+06	933154	1.41717e+06	708701	952706	419790	708652	285519	386544	262525	201442	130902	337975	1.61959e+06	223900	1.25393e+06	6.19779e+06	148372
P46720	1	1	121.61	0.0241885	4.63883	Young	Old	Solute carrier organic anion transporter family member 1A1 OS=Rattus norvegicus GN=Slco1a1 PE=1 SV=1	2	0	2	1	1	2	1	0	0	0	0	0	0	0	0	0	0	0	50680.5	23830.2	62074.5	193482	178668	157368	18684	3057.37	21262.5	4253.88	14156.6	4242.22	20271.1	10.9314	7863.74	470.642	0	24586.6
P62738	8	1	359.49	0.0595171	9.40641	Young	Old	Actin, aortic smooth muscle OS=Rattus norvegicus GN=Acta2 PE=2 SV=1	2	0	2	0	0	2	0	0	0	0	0	0	0	0	1	0	0	0	723310	206245	621995	409386	109203	724848	220997	184579	462007	181239	189376	116506	89639.8	41042	815854	223830	140638	353137
P00884	2	2	210.17	0.0716954	3.11706	Young	Old	Fructose-bisphosphate aldolase B OS=Rattus norvegicus GN=Aldob PE=1 SV=2	2	0	2	4	2	1	0	0	0	0	0	0	0	0	0	0	0	0	247137	134560	188636	544637	57981.7	89357.6	8440.91	15517.8	16824	89629.4	99490.6	5465.01	18183.2	0	62460.9	258.243	22334.5	135591
P48508	2	2	106.73	0.125104	7.36726	Young	Old	Glutamate--cysteine ligase regulatory subunit OS=Rattus norvegicus GN=Gclm PE=1 SV=1	4	0	2	1	0	0	0	0	0	0	0	0	0	0	0	0	0	0	391845	16715.8	258478	105996	728.348	51575.2	5649.26	6127.43	8670.65	2182.92	16964.7	3255.59	2980.49	37051.8	20907.4	15588.1	9146.37	73005
O70244	7	7	496.81	0.139894	2.19996	Young	Old	Cubilin OS=Rattus norvegicus GN=Cubn PE=1 SV=2	7	0	2	0	0	1	1	0	2	0	0	0	0	0	0	0	0	2	1.11176e+06	423548	561088	154484	173529	294551	901958	1.51489e+06	3.64164e+06	313055	301867	380462	295672	142141	282582	680041	337095	1.39274e+06
P01026	14	13	1016.53	0.253902	2.03048	Old	Young	Complement C3 OS=Rattus norvegicus GN=C3 PE=1 SV=3	7	0	2	2	0	4	1	0	3	9	5	1	0	1	7	16	5	1	1.47774e+06	610538	843889	2.09689e+06	631629	1.62218e+06	1.40911e+06	1.27956e+06	1.13714e+06	2.00751e+06	2.04809e+06	447087	363937	1.69601e+06	2.2613e+06	5.63508e+06	8.35683e+06	1.12752e+06
P08649	4	4	326.26	0.515537	1.11377	Young	Old	Complement C4 OS=Rattus norvegicus GN=C4 PE=1 SV=3	1	0	2	8	1	7	1	6	10	2	1	4	6	0	0	1	0	2	2.8034e+06	3.02755e+06	994912	6.31027e+06	1.58869e+06	3.31245e+06	5.51896e+06	7.07084e+06	8.37072e+06	1.42683e+06	1.15271e+06	5.66779e+06	3.13732e+06	1.73144e+07	1.11892e+06	960301	20648.1	3.06894e+06
P47820	4	4	104.64	0.62698	3.24866	Old	Young	Angiotensin-converting enzyme OS=Rattus norvegicus GN=Ace PE=2 SV=1	2	0	2	0	0	0	0	0	0	0	0	0	0	0	0	0	0	0	381270	133694	326089	580834	107886	89774.9	38370.8	172576	328553	299970	344359	413064	442864	14148.8	257732	563306	39215.1	224703
Q9ES87	1	1	38.75	0.707083	1.52103	Old	Young	Prostasin OS=Rattus norvegicus GN=Prss8 PE=2 SV=3	1	0	2	0	0	0	0	0	0	1	1	0	0	0	0	0	0	0	158140	61289.4	92209.2	163168	55666.2	56880.9	109005	53152.5	69901.3	86179.7	71572	140346	88677.3	0	142259	271098	275167	171054
P20762	1	1	21.91	0.00257124	5.23836	Young	Old	Ig gamma-2C chain C region OS=Rattus norvegicus PE=2 SV=1	0	0	1	0	1	1	1	0	0	0	0	0	0	0	0	0	0	0	379009	214870	162603	277488	318408	224582	569873	382225	12110.9	47808.3	39872.8	88968.4	49780.8	214060	21018.5	33663.6	93097.2	63831.1
P68255	2	1	116.75	0.0288324	3.03628	Young	Old	14-3-3 protein theta OS=Rattus norvegicus GN=Ywhaq PE=1 SV=1	0	0	1	1	0	1	0	0	0	0	0	0	0	0	1	0	0	1	9521.92	133316	33673.3	90939.8	89746.3	57105	1497.8	7795.95	37479	30151.4	14555.5	20221.3	5908.08	0	53672.6	42.5239	0	31048.1
Q6P7S1	1	1	21.53	0.0317557	2.36082	Young	Old	Acid ceramidase OS=Rattus norvegicus GN=Asah1 PE=2 SV=1	1	0	1	0	0	0	0	0	0	0	0	0	0	0	0	0	0	0	57682.7	7748.16	103971	44304.5	189454	55648.2	16734.1	53781.7	35008.5	16297.7	24273.8	25048.3	12857.2	32133.5	5762.86	103527	16037.9	4465.26
B0BNG2	2	1	42.33	0.0366632	13.457	Young	Old	Transmembrane 6 superfamily member 2 OS=Rattus norvegicus GN=Tm6sf2 PE=2 SV=1	0	0	1	0	0	0	0	0	0	0	0	0	0	0	0	0	0	0	21319.6	298089	1.15446e+06	132204	469154	12059.4	22740.5	15606.3	2137.01	16303.3	56290.8	11487	46233.1	0	14558	6871.19	378.464	7461.11
Q9WTW7	1	1	48.01	0.044844	8.45883	Young	Old	Solute carrier family 23 member 1 OS=Rattus norvegicus GN=Slc23a1 PE=2 SV=1	0	0	1	0	0	0	0	0	0	0	0	0	0	0	0	0	0	0	2171.54	126638	48675	16526.4	3668.52	1405.52	688.716	2170.13	5595.7	4710.02	6643	3630.26	8738.1	0	0	0	0	813.857
P42123	2	2	62.74	0.0475261	5.95013	Young	Old	L-lactate dehydrogenase B chain OS=Rattus norvegicus GN=Ldhb PE=1 SV=2	0	0	1	1	0	0	0	0	0	0	3	0	0	0	0	0	0	0	316.35	591077	90221.6	107193	375882	34710.3	1065.24	17735.8	2963.15	2050.9	109431	1956.31	71799.3	0	12056.7	2.5566	0	7668.74
P08460	1	1	168.15	0.0540456	1.50296	Young	Old	Nidogen-1 (Fragment) OS=Rattus norvegicus GN=Nid1 PE=2 SV=2	2	0	1	0	0	0	7	10	4	2	3	0	0	0	1	0	0	0	1.46694e+06	1.56173e+06	1.14344e+06	1.22092e+06	914572	978078	2.10675e+06	4.51774e+06	2.44908e+06	778841	428069	498898	971318	414663	614276	2.56745e+06	4.78648e+06	800284
P04904	2	1	99.89	0.0727251	1.43709	Young	Old	Glutathione S-transferase alpha-3 OS=Rattus norvegicus GN=Gsta3 PE=1 SV=3	1	0	1	0	0	0	0	0	0	1	0	0	0	0	0	0	0	0	49174.7	6138.35	33903	133408	11068.2	38696.3	44832.6	87224.8	17861.5	79339.1	30319.6	13146.8	11890.6	19.8679	17513	0.769153	58.5547	16376.9
Q64602	3	3	122.9	0.141564	4.36456	Young	Old	Kynurenine/alpha-aminoadipate aminotransferase, mitochondrial OS=Rattus norvegicus GN=Aadat PE=1 SV=1	4	0	1	1	0	0	0	0	0	0	0	0	0	0	0	0	0	0	516344	1833.55	69305.8	36704.1	3941.7	18591.2	0	155609	2416.01	17600.3	60.3261	2378.48	349.471	1097.09	3220.13	0	0	6391.82
Q5RKI7	1	1	49.93	0.148854	21.7742	Young	Old	Solute carrier family 7 member 13 OS=Rattus norvegicus GN=Slc7a13 PE=2 SV=1	2	0	1	0	0	1	0	0	0	0	0	0	0	0	0	0	0	0	141022	22003.7	41210.8	123239	2842.92	34951.4	3829.16	8367.2	0	8817.15	2716.76	2184.89	1197.14	0	1199.94	958.622	0	260.934
O55006	3	3	368.5	0.154044	2.53356	Old	Young	Protein RoBo-1 OS=Rattus norvegicus PE=1 SV=1	1	0	1	3	0	4	2	1	2	4	6	4	4	0	8	4	0	4	581778	10655.1	341955	756860	212921	927777	703955	436747	529486	815340	1.04914e+06	943326	780815	2.97423e+06	2.08352e+06	1.60019e+06	43100.4	1.44049e+06
Q4QQW8	1	1	105.72	0.16671	1.35856	Old	Young	Putative phospholipase B-like 2 OS=Rattus norvegicus GN=Plbd2 PE=1 SV=2	2	0	1	1	0	2	1	0	1	0	0	1	0	1	0	1	0	1	179614	42760.1	145984	105059	53130.9	126529	107735	101857	126171	50020.8	45579.4	44679.7	41905.3	755453	193701	367110	0	117168
Q63691	2	2	216.48	0.17942	1.36959	Young	Old	Monocyte differentiation antigen CD14 OS=Rattus norvegicus GN=Cd14 PE=2 SV=2	3	0	1	0	2	0	5	0	2	0	0	0	0	3	2	1	0	2	184139	29225.4	84401.8	47028.9	63778.5	60183.6	521731	203995	415961	83126.3	35074.4	55346.4	32109.6	665323	140772	111032	4948.49	239530
P14408	1	1	21.56	0.231272	1.97396	Young	Old	Fumarate hydratase, mitochondrial OS=Rattus norvegicus GN=Fh PE=1 SV=1	0	0	1	0	0	0	0	0	0	0	0	0	0	0	0	0	0	0	351312	300216	1.04905e+06	446258	96082.9	312432	1.65753e+06	32997.9	138878	36901.9	30790.6	206750	695026	363723	271960	75877.4	130793	9607.09
Q9Z2J9	1	1	17.02	0.239133	2.6072	Young	Old	Runt-related transcription factor 2 (Fragments) OS=Rattus norvegicus GN=Runx2 PE=2 SV=2	1	0	1	0	2	0	0	0	0	0	0	0	0	0	0	0	0	0	7.64061e+06	1.01895e+06	4.64235e+06	92337.3	1.76415e+06	755020	2.99954e+06	1.57986e+06	1.19178e+06	2.16942e+06	1.89566e+06	1.57353e+06	1.29923e+06	0	468470	204416	0	706475
Q0PMD2	2	2	90.54	0.310461	2.66734	Young	Old	Anthrax toxin receptor 1 OS=Rattus norvegicus GN=Antxr1 PE=2 SV=2	3	0	1	2	0	1	3	3	3	0	1	0	0	0	1	0	0	2	693313	477685	672725	818289	301083	656146	364309	600837	346008	166388	236098	195871	169053	43174.3	130952	98447.6	158467	88733.9
P60905	1	1	143.47	0.356632	2.02176	Young	Old	DnaJ homolog subfamily C member 5 OS=Rattus norvegicus GN=Dnajc5 PE=1 SV=1	3	0	1	0	0	1	0	0	0	1	0	1	0	0	0	0	0	0	182769	97964.4	78838	73864.9	37831.3	11270.2	12748.5	55.9422	2075.6	11876.3	15372.4	12320.9	9583.31	18.4291	1345.93	153.61	1905.79	65213.9
Q6P767	1	1	26.05	0.35693	7.71383	Young	Old	Pituitary tumor-transforming gene 1 protein-interacting protein OS=Rattus norvegicus GN=Pttg1ip PE=2 SV=1	0	0	1	0	0	0	0	0	0	0	0	0	0	0	0	0	0	0	4430.32	5332.49	71673	4558.35	1642.48	0	0	1545.47	1614.17	3781.28	31.9255	366.206	2155.5	0	2551.77	0	0	2883.89
Q9R1T3	1	1	127.18	0.386304	2.23067	Old	Young	Cathepsin Z OS=Rattus norvegicus GN=Ctsz PE=1 SV=2	0	0	1	1	0	0	0	0	0	0	2	0	1	0	0	0	0	0	5511.41	5743.45	21348.1	43818.5	850.624	20619.1	57.3673	40.8833	46.8617	797.135	25761.1	5529.37	26182.3	0	286.247	7.98553	0	589.475
P61972	2	2	70.02	0.432322	5.9283	Old	Young	Nuclear transport factor 2 OS=Rattus norvegicus GN=Nutf2 PE=1 SV=1	0	0	1	0	0	0	0	0	0	0	0	0	0	0	0	1	0	0	76757	26591	120938	26078.5	16797.9	211987	171886	41995.3	22954.3	79278.9	76391.6	165097	21060.2	127491	114418	4.94872e+06	42018.8	30692.4
P50115	5	5	465.03	0.440617	2.62411	Old	Young	Protein S100-A8 OS=Rattus norvegicus GN=S100a8 PE=1 SV=3	3	0	1	0	0	0	0	0	0	4	1	1	0	0	13	0	0	1	774352	187506	496804	144657	272580	331639	313848	714028	677078	680080	405913	338232	220417	410296	7.65598e+06	800826	153545	661356
P53813	1	1	38.18	0.50895	28.0893	Young	Old	Vitamin K-dependent protein S OS=Rattus norvegicus GN=Pros1 PE=2 SV=1	0	0	1	0	0	0	0	0	0	0	0	0	0	0	0	0	0	0	908.593	0	59732.9	0	0	0	0	0	0	0	0	0	2158.56	0	0	0	0.324601	0
Q5FVH2	1	1	36.52	0.571502	2.17143	Old	Young	Phospholipase D3 OS=Rattus norvegicus GN=Pld3 PE=2 SV=1	0	0	1	0	0	0	0	0	0	0	0	0	0	0	0	0	0	0	3641.92	5128.09	26703.2	6007.67	147.853	3181.63	0	1095.04	575.743	600.275	10124.9	9683.69	0	7868.99	2190.82	2896.73	28543.4	11265.5
Q62638	1	1	20.52	0.584064	7.59076	Young	Old	Golgi apparatus protein 1 OS=Rattus norvegicus GN=Glg1 PE=1 SV=1	0	0	1	0	0	0	0	0	0	0	0	0	0	0	0	0	0	0	976.073	7626.77	23516	6574.08	3219.19	185.475	0	0	0	49.1174	179.108	134.859	418.637	0	142.998	0	0	50.488
A5HK05	1	1	19.2	0.593605	1.33396	Young	Old	Amyloid protein-binding protein 2 OS=Rattus norvegicus GN=Appbp2 PE=2 SV=1	0	0	1	1	0	1	0	0	0	0	0	0	0	0	0	0	0	0	523937	46308	207484	1.26036e+06	38458	2.0616e+06	1.29251e+06	2.65217e+06	2.15236e+06	1.22492e+06	605954	1.26502e+06	752884	1.14961e+06	1.34761e+06	369394	77710.1	893002
P19112	1	1	120.3	0.610265	1.54919	Young	Old	Fructose-1,6-bisphosphatase 1 OS=Rattus norvegicus GN=Fbp1 PE=1 SV=2	0	0	1	2	0	0	0	0	0	0	2	0	0	0	0	0	0	0	530.686	12516.5	52710.9	142415	16589.8	46916.8	33.9904	35.7778	33.9693	12567.8	53614.7	7822.45	17109.2	4.26133	1424.61	63.0964	0.191512	298.533
P80067	2	2	88	0.628129	1.70677	Young	Old	Dipeptidyl peptidase 1 OS=Rattus norvegicus GN=Ctsc PE=1 SV=3	0	0	1	0	0	0	0	0	1	0	1	0	0	0	0	1	0	0	60910.9	23806.5	242080	47333	35578.4	0	142616	11341.4	221782	36644.9	133638	51966	53083.7	39416.7	277.049	132180	20377.8	1726.76
P37727	1	1	13.93	0.720644	1.68811	Young	Old	Rab proteins geranylgeranyltransferase component A 1 OS=Rattus norvegicus GN=Chm PE=1 SV=1	0	0	1	0	0	0	0	0	0	0	0	0	0	0	0	0	0	0	232.889	54278.8	49130.2	10475.8	50166.9	26478.4	654.05	0	714.563	14778.2	38152.6	16295.8	37058.8	0	3576.51	1246.86	0	2706.06
P97531	1	1	23.49	0.747889	9.94622	Young	Old	Cdc42-interacting protein 4 OS=Rattus norvegicus GN=Trip10 PE=1 SV=3	0	0	1	0	0	0	0	0	0	0	0	0	0	0	0	0	0	0	6.48131	0	83433.4	506.829	655.854	0	0	0	0	1262.1	194.689	0	3055.01	0	0	0	13.1315	0
P08650	1	1	15.35	0.784024	29.9447	Young	Old	Complement C5 (Fragment) OS=Rattus norvegicus GN=C5 PE=1 SV=2	0	0	1	0	0	0	0	0	0	0	0	0	0	0	0	0	0	0	0	0	13064.9	0	0	0	0	0	0	0	0	0	436.302	0	0	0	0	0
P00502	2	1	96.75	0.796141	1.29231	Young	Old	Glutathione S-transferase alpha-1 OS=Rattus norvegicus GN=Gsta1 PE=1 SV=3	2	0	1	0	0	0	0	0	0	0	0	0	0	0	0	0	0	0	347613	43276	168200	253002	61556.5	173034	26794.7	103051	91535.3	75211	78573.9	45158.9	42228.5	234997	120337	172630	72403.5	60123.5
P40241	1	1	20.05	0.815589	1.18791	Young	Old	CD9 antigen OS=Rattus norvegicus GN=Cd9 PE=1 SV=2	0	0	1	0	0	0	0	0	0	0	0	0	0	0	0	0	0	0	85413.3	24099.9	70323.8	14108	12735.6	19971.3	6185.73	10560.4	18172	19626.7	9945.18	12940.4	6931.6	2477.72	15645.3	85150.1	29933.9	28087.6
Q6MG61	1	1	87.78	0.90385	2.58978	Young	Old	Chloride intracellular channel protein 1 OS=Rattus norvegicus GN=Clic1 PE=1 SV=1	0	0	1	1	1	0	0	0	0	0	0	0	0	0	0	0	0	0	0	0	163661	35486.9	72574.6	6236.26	1193.61	0	0	649.109	98001.9	1317.05	4327.67	0	0	12.8868	0	1229.59
Q99J86	2	2	115.69	0.957771	1.10291	Young	Old	Attractin OS=Rattus norvegicus GN=Atrn PE=2 SV=1	0	0	1	0	0	0	0	0	0	2	0	1	1	0	0	1	0	0	36554.6	71213.8	136558	54614.1	109114	83617.1	215433	146895	163567	122120	101284	143188	106239	22888.7	157102	78657.8	60984.4	124169
P62630	1	1	67.5	0.963047	5.29255	Young	Old	Elongation factor 1-alpha 1 OS=Rattus norvegicus GN=Eef1a1 PE=1 SV=1	1	0	1	0	0	0	0	0	0	0	0	0	0	0	0	0	0	0	138324	0	66763.8	50506.4	0	0	0	1373.57	1547.64	1522.78	722.529	0	0	30444.4	0	1811.41	0	14148.3
P08932	23	7	2734.48	1.84962e-06	8.50123	Old	Young	T-kininogen 2 OS=Rattus norvegicus PE=1 SV=2	0	0	0	1	1	0	0	0	0	25	22	19	22	14	6	24	37	2	481391	1.01949e+06	581378	811589	1.1232e+06	465968	511936	527787	415740	3.75893e+06	4.25362e+06	4.50621e+06	3.9314e+06	9.01704e+06	1.47262e+06	1.01328e+07	1.66109e+07	1.64707e+06
Q66H43	1	1	18.32	0.00058079	55.7529	Old	Young	Uncharacterized protein C17orf59 homolog OS=Rattus norvegicus PE=2 SV=2	0	0	0	0	0	0	0	0	0	0	0	0	0	0	1	0	0	0	6903.21	34.978	711.359	765.99	0	8501.23	0	8628.95	9684.68	25784.2	28258.9	56553.7	47417	20597.5	1.41201e+06	50730.9	77098	20127.1
Q9Z340	1	1	23.29	0.000860758	2.12487	Old	Young	Partitioning defective 3 homolog OS=Rattus norvegicus GN=Pard3 PE=1 SV=1	0	0	0	1	0	0	0	0	0	0	0	0	0	1	0	0	0	0	131801	20599.3	134676	221424	66988	360707	242995	478235	165378	7.60845e+06	7.11573e+06	7.25812e+06	5.37137e+06	8.41484e+06	7.6479e+06	7.65225e+06	8.20735e+07	2.23209e+06
Q5BK46	1	1	17.38	0.00139827	22.959	Old	Young	Ribonuclease H1 OS=Rattus norvegicus GN=Rnaseh1 PE=2 SV=1	0	0	0	0	0	0	0	0	0	0	0	0	0	0	0	1	0	0	16358.7	0	1202.89	0	0	6017.8	0	85.7231	0	196668	8780.76	8249.03	5186.5	13542.4	143603	1.24846e+06	859.721	179084
P81128	1	1	14.59	0.0026365	34.8564	Old	Young	Rho GTPase-activating protein 35 OS=Rattus norvegicus GN=Arhgap35 PE=1 SV=2	0	0	0	0	0	0	0	0	0	0	0	0	0	0	0	1	0	0	13350.8	7058.06	10479.5	101.18	3695.2	3956.88	8648.13	10266.6	20633.5	113880	87153.1	85019	68103.5	730538	70271.7	1.48459e+06	3435.47	85190.5
Q00657	4	4	179.26	0.00308259	4.88204	Young	Old	Chondroitin sulfate proteoglycan 4 OS=Rattus norvegicus GN=Cspg4 PE=1 SV=2	2	0	0	0	0	0	2	0	3	0	0	0	0	0	0	0	0	0	479568	562783	587901	1.04827e+06	369330	953740	250827	62839.8	1.35007e+06	126140	201901	224542	179070	129309	71730.8	78076	21543.4	57064.8
P50430	2	2	61	0.00402137	1.17181	Young	Old	Arylsulfatase B OS=Rattus norvegicus GN=Arsb PE=2 SV=2	0	0	0	1	0	0	0	0	0	0	0	0	0	0	0	0	0	1	75066.2	8456.33	1694.69	32188.9	3324.81	41107.9	2016.22	4382.81	2465.94	938.411	0	0	3.06449	702.701	0	0	0	57268.4
P08937	5	5	292.08	0.00521976	4.73496	Old	Young	Odorant-binding protein OS=Rattus norvegicus GN=Obp1f PE=1 SV=1	3	0	0	0	0	4	0	0	6	5	5	2	5	4	19	0	0	5	1.19997e+06	347657	728688	653985	283460	1.53439e+06	1.69661e+06	927329	4.14932e+06	3.74186e+06	4.25416e+06	3.07377e+06	3.17645e+06	7.08726e+06	2.67746e+07	1.21596e+06	1.53417e+06	6.06265e+06
Q06606	1	1	17.6	0.00827008	20.1572	Young	Old	Granzyme-like protein 2 OS=Rattus norvegicus GN=Mcpt10 PE=2 SV=1	0	0	0	0	0	0	0	0	1	0	0	0	0	0	0	0	0	0	1.51194e+06	171699	813279	124104	118268	80727.5	28983.1	25972.2	63264.2	34624.4	17430.1	28656.7	19909	0	25674.3	0	0	19525.2
P24368	1	1	112.64	0.00897253	3.54172	Young	Old	Peptidyl-prolyl cis-trans isomerase B OS=Rattus norvegicus GN=Ppib PE=2 SV=3	2	0	0	0	0	0	1	0	0	0	0	0	0	0	0	0	0	0	284177	97061.1	194596	5459.35	406781	38348.2	129237	61526.1	53303.7	12233	12523.7	9430.11	8507.48	11722.3	29497.4	110850	4561.56	181074
P02091	8	2	755.78	0.0131203	22.4747	Old	Young	Hemoglobin subunit beta-1 OS=Rattus norvegicus GN=Hbb PE=1 SV=3	0	0	0	3	0	0	0	0	0	0	0	4	2	0	2	4	0	0	361561	104599	197175	1.42871e+06	41758.4	82904.7	326546	101956	61062.6	286270	226890	5.41515e+06	3.62386e+06	147169	646744	4.03378e+07	250941	219355
P07154	3	3	184.22	0.0134532	2.78858	Young	Old	Cathepsin L1 OS=Rattus norvegicus GN=Ctsl1 PE=1 SV=2	1	0	0	0	0	0	0	3	1	0	1	0	0	0	2	0	0	0	1.28784e+06	364007	939786	151976	288413	311531	1.31825e+06	929845	1.57581e+06	367354	364351	328543	208599	484509	309825	368847	71436.6	70768.3
Q03336	1	1	31.14	0.0142496	4.07501	Old	Young	Regucalcin OS=Rattus norvegicus GN=Rgn PE=1 SV=3	2	0	0	0	0	1	0	0	0	0	0	0	0	0	0	1	0	0	157740	303261	193447	427373	62181.8	162041	13078.8	180886	16081.6	582185	365052	1.37554e+06	1.77158e+06	617229	194419	798585	322432	74626.2
Q6RY07	5	4	278.16	0.0161694	3.27832	Old	Young	Acidic mammalian chitinase OS=Rattus norvegicus GN=Chia PE=2 SV=1	0	0	0	0	0	0	0	0	0	1	1	4	5	5	1	7	0	6	391644	1.24777e+06	1.18822e+06	403572	1.24039e+06	190147	284716	221394	620650	959624	701918	2.41128e+06	1.17594e+06	2.72776e+06	1.31316e+06	5.55377e+06	360130	3.74963e+06
P14480	4	4	189.2	0.0206581	20.1956	Old	Young	Fibrinogen beta chain OS=Rattus norvegicus GN=Fgb PE=1 SV=4	0	0	0	0	0	0	0	0	0	0	0	0	0	0	0	5	0	0	10328.8	0	5903.79	5726.48	6223.5	3568.69	5580.96	21711.9	17649.7	20312.1	22073.4	13518.5	15228.3	64899	44519.1	1.51353e+06	150914	27361.5
P82450	3	2	141.45	0.020993	1.39718	Young	Old	Sialate O-acetylesterase OS=Rattus norvegicus GN=Siae PE=1 SV=2	0	0	0	1	0	1	1	1	1	0	0	0	0	0	0	0	0	0	155380	329511	74583.3	108890	168221	232855	349801	355600	311027	20395.9	18015.1	20923.6	5251.43	1.20785e+06	44961.7	86019.4	213.881	91830.5
P26644	2	2	96.71	0.0232295	4.20111	Young	Old	Beta-2-glycoprotein 1 OS=Rattus norvegicus GN=Apoh PE=2 SV=2	0	0	0	0	0	2	4	2	2	0	0	0	0	0	1	0	0	1	152299	226149	91893.7	509804	167526	552613	920831	289255	618054	121776	44482.5	96530.4	32394.8	197.913	140743	1252.86	5728.08	381451
Q63621	1	1	27.85	0.0250309	46.4401	Old	Young	Interleukin-1 receptor accessory protein OS=Rattus norvegicus GN=Il1rap PE=2 SV=1	0	0	0	0	0	0	0	0	0	0	0	0	0	5	0	0	0	0	0	467.246	0	2169.96	0	26152.1	0	0	0	556.586	21607.1	408.76	6312	1.08896e+06	1227.01	0	432.51	217479
P11517	7	1	726.24	0.0284663	8.14094	Old	Young	Hemoglobin subunit beta-2 OS=Rattus norvegicus PE=1 SV=2	0	0	0	3	0	0	0	0	0	0	0	2	3	0	0	7	0	0	80864.5	79745.2	67279.1	435155	108361	84587.1	22497.5	35220.9	28245	160755	135206	694204	684066	431930	247971	1.89008e+07	524644	74109.9
Q5U315	1	1	22.75	0.0288689	64.7705	Young	Old	Poly(A) RNA polymerase GLD2 OS=Rattus norvegicus GN=Papd4 PE=2 SV=1	0	0	0	1	0	1	0	0	0	0	0	0	0	0	0	0	0	0	264030	1.55253e+07	229639	2.92125e+07	1.67637e+07	3.54533e+06	23520.8	11235.1	37733.4	27522.4	55972.4	401104	291221	18244.4	20959	6064.35	88726.9	59672.5
Q5HZW5	1	1	113.89	0.0315709	5.17707	Young	Old	CD320 antigen OS=Rattus norvegicus GN=Cd320 PE=2 SV=1	0	0	0	0	0	1	2	2	3	0	0	0	0	0	0	0	0	0	11757.8	56327.4	24731.6	124432	43170.2	163809	324113	613699	206457	41451.3	41147.6	38657.7	47086.5	212.541	78669.4	6239.9	0	59302
Q63009	1	1	20.55	0.0354444	3.2746	Old	Young	Protein arginine N-methyltransferase 1 OS=Rattus norvegicus GN=Prmt1 PE=1 SV=1	0	0	0	0	0	0	0	0	0	0	0	1	0	0	0	0	0	0	279174	251765	184768	1.22958e+06	147935	877406	42863.1	163299	307010	279637	177731	2.47866e+06	3.02198e+06	2.30352e+06	127058	568093	1.06063e+06	776980
P50137	2	2	98.34	0.0420778	21.5381	Old	Young	Transketolase OS=Rattus norvegicus GN=Tkt PE=1 SV=1	0	0	0	0	0	0	0	0	0	0	0	0	0	0	4	0	0	0	15340.9	34949.9	16827.1	42783.9	20636.6	5139.61	11798.5	29670.8	23200.5	53316.3	41283.5	26235.5	10754.8	275443	1.1322e+06	14937.4	2.97604e+06	32496.9
Q5RJR4	1	1	13.2	0.0450899	11.9193	Old	Young	Zinc finger protein 467 OS=Rattus norvegicus GN=Znf467 PE=2 SV=1	0	0	0	0	0	0	0	0	0	0	1	0	0	0	0	0	0	0	65640.9	2411.21	53658.9	69601.3	4039.51	40425.6	1.81372e+06	2.73628e+06	4.35674e+06	1.26099e+07	1.0651e+07	1.85069e+07	9.29414e+06	5430.05	2.52275e+07	3.29973e+07	11296.2	1.04742e+07
P62870	1	1	13.28	0.0477321	50.3215	Old	Young	Transcription elongation factor B polypeptide 2 OS=Rattus norvegicus GN=Tceb2 PE=1 SV=1	0	0	0	0	0	0	0	0	0	0	0	0	0	1	0	0	0	0	4112.69	1460.8	4444.29	0	16.6241	5936.89	15151	8229.97	14455.1	10400.7	5428.85	3492.14	3178.9	3.6409e+06	7518.48	420112	24421.7	4601.49
P97829	1	1	41.27	0.0504071	6.61083	Young	Old	Leukocyte surface antigen CD47 OS=Rattus norvegicus GN=Cd47 PE=1 SV=1	1	0	0	0	0	0	0	0	0	0	0	0	0	0	0	0	0	0	23476.7	15178.1	13537.9	1252.25	751.955	4629.98	0	9700.98	548.15	8627.99	7360.86	8668.5	6217.89	0	0	0	0	519.693
O88766	1	1	58.37	0.050634	1.16801	Old	Young	Neutrophil collagenase OS=Rattus norvegicus GN=Mmp8 PE=2 SV=1	0	0	0	0	0	0	0	0	0	0	0	0	1	1	2	1	0	1	25958.5	83626.5	31143.9	65463.5	48126.9	102964	162618	253851	176466	109403	125444	280287	173629	487709	332008	367381	1.50488e+06	484622
Q07803	1	1	13.42	0.0542678	19.8494	Old	Young	Elongation factor G, mitochondrial OS=Rattus norvegicus GN=Gfm1 PE=1 SV=2	0	0	0	1	1	0	0	0	0	0	0	0	0	0	0	0	0	0	43908.4	3826.26	75208.2	21257.2	12182.8	794.746	138.74	327.599	122.225	261898	305998	203311	180474	3505.61	99025.2	501.131	2811.2	715.171
Q63644	1	1	15.22	0.0544609	117.66	Young	Old	Rho-associated protein kinase 1 OS=Rattus norvegicus GN=Rock1 PE=1 SV=1	0	0	0	0	0	0	0	0	1	0	0	0	0	0	0	0	0	0	0	445.661	0	0	677.365	0	129917	0	43663.7	0	0	0	0	0	0	0	0	1489.33
Q62862	1	1	16.79	0.0544851	6.77979	Old	Young	Dual specificity mitogen-activated protein kinase kinase 5 OS=Rattus norvegicus GN=Map2k5 PE=1 SV=1	0	0	0	0	0	1	0	0	0	0	0	0	0	0	0	0	0	0	68527.4	0	14199.7	33286	0	2.75032e+06	474603	244897	139026	5.9342e+06	3.7086e+06	6.86233e+06	1.90314e+06	6.32021e+06	4.03334e+06	57519.3	19795.6	23483
Q08420	3	3	255.91	0.054621	2.19632	Old	Young	Extracellular superoxide dismutase [Cu-Zn] OS=Rattus norvegicus GN=Sod3 PE=1 SV=2	1	0	0	3	0	1	3	3	2	3	5	3	7	3	2	2	0	2	203703	230718	171220	398599	268529	134012	176223	283136	183868	446184	601758	444786	567711	1.45341e+06	343140	466393	156854	283151
O88900	1	1	13.54	0.0558929	6.30965	Young	Old	Growth factor receptor-bound protein 14 OS=Rattus norvegicus GN=Grb14 PE=2 SV=1	0	0	0	0	0	0	1	0	0	0	0	0	0	0	0	0	0	0	1.50398e+06	3.92849e+06	943463	153860	4.0117e+06	5.60113e+06	7.9454e+06	1.00424e+07	6.35738e+06	581816	520382	1.93757e+06	1.53489e+06	1413.91	825713	405801	157.985	578496
P02651	2	2	62.69	0.0585173	1.01731	Young	Old	Apolipoprotein A-IV OS=Rattus norvegicus GN=Apoa4 PE=2 SV=2	0	0	0	0	0	1	1	0	0	0	0	0	0	0	0	0	0	0	58522.1	3511.18	66119.4	32374.6	31519.5	124780	148304	31666.2	59157.8	5639.07	9873.29	2323.98	4280.32	13158.6	7285.68	0	522039	3562.31
D3ZTE0	1	1	91.39	0.0594901	50.0524	Young	Old	Coagulation factor XII OS=Rattus norvegicus GN=F12 PE=2 SV=1	0	0	0	0	0	0	2	0	4	0	0	0	0	0	0	0	0	0	14226	2868.87	12243	5011.63	1603.77	11194.9	883576	66269.9	1.73128e+06	2965.21	4093.86	1205.07	6385.94	8553.33	43031.3	17263.5	1204.19	33036.7
Q6AXY0	1	1	17.1	0.0711431	6.09341	Old	Young	Glutathione S-transferase A6 OS=Rattus norvegicus GN=Gsta6 PE=1 SV=1	0	0	0	0	0	0	0	0	0	0	0	0	0	0	1	0	0	0	400184	550428	461050	648478	652206	948061	503037	54646.4	618786	580175	1.41241e+06	480919	941491	2.44146e+06	643536	1.21503e+07	4.22765e+07	484795
O35112	1	1	81.93	0.0776165	1.10561	Young	Old	CD166 antigen OS=Rattus norvegicus GN=Alcam PE=1 SV=1	1	0	0	0	0	1	1	2	2	1	1	0	0	0	2	0	0	0	19819.8	4418.21	20771.2	32600.2	2670.83	43356.9	17116	134782	70371.9	63832.3	42473.8	51753.2	49228.2	0	93886	0	0	13546
P06399	1	1	31.34	0.0855965	55.2905	Old	Young	Fibrinogen alpha chain OS=Rattus norvegicus GN=Fga PE=1 SV=3	0	0	0	0	0	0	0	0	0	0	0	0	0	0	0	2	0	0	1564.92	0	0	0	0	0	3783.48	5259.26	1507.92	11764.1	1243.42	4050.12	2997.27	0	1132.37	641858	20.6348	0
B5DFA1	1	1	20.86	0.089019	Infinity	Young	Old	TBC1 domain family member 2A OS=Rattus norvegicus GN=Tbc1d2 PE=2 SV=1	0	0	0	1	0	0	0	0	0	0	0	0	0	0	0	0	0	0	0	14747.3	0	81840.6	39.4897	0	0	0	0	0	0	0	0	0	0	0	0	0
Q4V885	1	1	59.87	0.0897449	1.98674	Young	Old	Collectin-12 OS=Rattus norvegicus GN=Colec12 PE=2 SV=1	0	0	0	0	1	1	0	0	0	0	0	0	0	0	0	0	0	0	124125	122839	68472.2	4210.89	114817	214466	240243	214506	82106	124494	116531	61045.1	88813.4	98949.6	95680.2	561.627	0	45019.1
Q08406	1	1	55.56	0.0927018	Infinity	Young	Old	Ciliary neurotrophic factor receptor subunit alpha OS=Rattus norvegicus GN=Cntfr PE=2 SV=2	0	0	0	1	0	0	0	0	0	0	0	0	0	0	0	0	0	0	0	182.809	0	32450.7	44.8744	0	0	0	0	0	0	0	0	0	0	0	0	0
P05011	1	1	20.48	0.0941864	6.44163	Young	Old	Interferon alpha-1 OS=Rattus norvegicus GN=Ifna1 PE=2 SV=1	0	0	0	0	0	0	0	0	0	0	1	0	0	0	0	0	0	0	531283	531555	926314	367725	623913	141913	98935.2	128614	80155.8	81234.8	145247	73695	177050	32543.2	20085.4	0	0	2682.07
Q80WD1	1	1	125.69	0.094643	8.36566	Young	Old	Reticulon-4 receptor-like 2 OS=Rattus norvegicus GN=Rtn4rl2 PE=2 SV=1	0	0	0	0	0	0	0	1	0	0	0	0	0	0	0	0	0	0	5430.71	5569.46	15887.5	63.5278	15584.3	8111.52	3239.29	253520	2112.01	4386	4024.56	8473.96	9729.27	0	3078.55	76.3684	0	4973.96
P00697	1	1	124.82	0.0983752	6.62878	Old	Young	Lysozyme C-1 OS=Rattus norvegicus GN=Lyz1 PE=1 SV=2	0	0	0	0	0	0	0	0	0	2	0	0	0	0	5	0	0	0	96345.3	106722	28506.5	1.19475	59890.2	0	6550.09	6340.32	40701.9	100560	6512.67	7946.87	2251.66	4902.21	1.46071e+06	8379.33	18992.6	52125.1
F1MA98	1	1	31.98	0.100564	8.76573	Old	Young	Nucleoprotein TPR OS=Rattus norvegicus GN=Tpr PE=1 SV=1	0	0	0	0	0	0	0	0	0	0	1	0	0	0	0	0	0	0	383976	50564.2	55239.8	18912	0	2.30034e+06	518853	230393	146299	6.30817e+06	3.65932e+06	7.26482e+06	1.60269e+06	1.04371e+07	6.4152e+06	99613.4	19956.3	18210
O70513	3	3	259.17	0.114841	1.46427	Young	Old	Galectin-3-binding protein OS=Rattus norvegicus GN=Lgals3bp PE=1 SV=2	2	0	0	0	0	6	5	2	2	3	3	0	0	1	1	1	0	5	747681	1.12419e+06	693897	588082	383721	997050	545448	564535	771203	645839	546095	468378	498438	310113	414208	919225	13705.7	999299
Q02765	1	1	43.25	0.11771	3.01346	Young	Old	Cathepsin S OS=Rattus norvegicus GN=Ctss PE=2 SV=1	0	0	0	0	0	1	1	0	2	0	0	0	0	1	1	0	0	0	57186.3	286383	43620	605032	265657	265755	90002.3	66174.9	175613	210156	173750	176483	200309	111256	166399	7400.05	97178.8	14545.3
P01946	7	7	709.97	0.118262	4.7379	Old	Young	Hemoglobin subunit alpha-1/2 OS=Rattus norvegicus GN=Hba1 PE=1 SV=3	0	0	0	14	0	0	8	10	0	0	0	29	22	0	7	50	0	0	2.303e+06	1.34221e+06	1.33901e+06	5.18669e+06	1.63601e+06	957089	2.58878e+06	2.8752e+06	1.6472e+06	1.57462e+06	1.50258e+06	2.22795e+07	1.63861e+07	1.5498e+06	4.03027e+06	1.23082e+08	4.44746e+06	1.77906e+06
Q66H12	1	1	38.17	0.118561	1.96882	Young	Old	Alpha-N-acetylgalactosaminidase OS=Rattus norvegicus GN=Naga PE=2 SV=1	0	0	0	0	0	0	1	0	1	0	0	0	0	0	0	0	0	1	32820.8	24754.8	39566.5	31294.8	89126.1	48270.9	67654.3	2288.32	63748.2	16996.1	20718.2	32722.6	20008.1	0	49301.4	1315.27	0.0468602	61876.9
P08592	3	3	169.95	0.118787	1.73383	Young	Old	Amyloid beta A4 protein OS=Rattus norvegicus GN=App PE=1 SV=2	0	0	0	3	2	1	4	5	5	1	1	2	1	2	3	0	0	0	167921	48803.8	105889	182117	143628	102346	402440	607758	486028	128633	133440	86190.8	101402	551146	216896	126734	8877.6	165279
Q63083	4	4	111.16	0.119694	2.37261	Young	Old	Nucleobindin-1 OS=Rattus norvegicus GN=Nucb1 PE=1 SV=1	0	0	0	0	0	0	1	1	4	0	0	0	0	0	0	0	0	0	42424	54210.9	60419.4	28614.1	203057	75241.3	289280	129988	460449	26317.9	30925.1	59368	67612.5	7939.1	48178.7	7895.61	0	72875.2
Q6IFV1	5	1	291.98	0.12274	275.053	Young	Old	Keratin, type I cytoskeletal 14 OS=Rattus norvegicus GN=Krt14 PE=2 SV=1	0	0	0	0	1	0	0	0	0	0	0	0	0	0	0	0	0	0	0	24987.5	1868.14	1258.56	18327.3	0	706.454	0	0	65.4257	16.1723	0	51.3137	0	0	38.5027	0	0
P48199	1	1	45.74	0.136057	31.4578	Old	Young	C-reactive protein OS=Rattus norvegicus GN=Crp PE=1 SV=1	0	0	0	0	0	0	2	0	0	0	0	0	0	3	0	3	0	0	2988.84	25978.4	9759.3	11167.9	7436.8	2673.54	176400	18039.8	40.8275	3425.34	5584.77	7145.72	13065.7	3.94072e+06	197.011	3.92422e+06	18780.3	31347.7
Q9Z1C7	1	1	23.13	0.142828	95.1706	Young	Old	Rap guanine nucleotide exchange factor 4 (Fragment) OS=Rattus norvegicus GN=Rapgef4 PE=2 SV=1	0	0	0	0	1	0	0	0	0	0	0	0	0	0	0	0	0	0	142.699	192135	0	435.575	219745	879.119	0	0	668.141	0	0	909.986	1421.44	1266.64	0	768.585	0	0
Q5M836	1	1	14.6	0.144284	2.66652	Young	Old	LysM and putative peptidoglycan-binding domain-containing protein 3 OS=Rattus norvegicus GN=Lysmd3 PE=2 SV=1	1	0	0	0	0	0	0	0	0	0	0	0	0	0	0	0	0	0	5.57287e+06	819861	3.41738e+06	14065	1.25205e+06	599089	2.30208e+06	1.13278e+06	982406	1.5191e+06	1.41054e+06	1.17028e+06	928803	0	393422	25291.1	0	586456
Q3T1H8	1	1	17.16	0.148019	1.9902	Old	Young	Transmembrane protein 79 OS=Rattus norvegicus GN=Tmem79 PE=2 SV=1	0	0	0	0	0	0	0	0	0	0	0	1	0	0	0	0	0	0	946.693	59786.4	26667.3	507.081	0	7178.54	254.565	0	0	2728.04	4015.83	106464	10889.7	27945.3	45898.6	6529.45	0	4084.11
P20759	8	2	622.77	0.156158	4.84688	Old	Young	Ig gamma-1 chain C region OS=Rattus norvegicus PE=1 SV=1	0	0	0	0	0	2	0	0	0	2	3	0	0	0	2	0	0	2	14674.4	8156.92	33523.8	40455.9	15849.1	260609	49927.2	4051.85	80429.4	675892	599759	272229	87636.1	139091	249162	30855.3	178.064	396336
P14630	1	1	15.84	0.15977	3.3159	Young	Old	Apolipoprotein M OS=Rattus norvegicus GN=Apom PE=1 SV=2	0	0	0	0	0	0	0	0	0	0	0	0	1	0	0	0	0	0	1.06016e+06	60385	224039	26658.8	51127.3	52683.1	2098.23	14248.1	121719	141371	163404	80305.9	42792.6	0	39268.8	0	0	19337.7
Q62812	1	1	17.9	0.162495	Infinity	Old	Young	Myosin-9 OS=Rattus norvegicus GN=Myh9 PE=1 SV=3	0	0	0	0	0	0	0	0	0	0	0	0	0	0	1	0	0	0	0	0	0	0	0	0	0	0	0	436.572	0	0	0	0	20090.5	0	0	0
P98089	1	1	34.53	0.162711	8718.11	Young	Old	Intestinal mucin-like protein (Fragment) OS=Rattus norvegicus PE=2 SV=1	0	0	0	0	0	0	0	0	1	0	0	0	0	0	0	0	0	0	0	0	350.301	0	765.312	0	0	0	392853	0	0	0	0	0	0	0	0	0
Q6JHU9	1	1	15.39	0.173064	1.65489	Young	Old	CREB-binding protein OS=Rattus norvegicus GN=Crebbp PE=2 SV=1	0	0	0	0	0	0	0	0	0	0	0	0	0	0	0	1	0	0	34293.5	30689.2	16498.6	19307.4	21042.3	8284.45	43397.6	227594	14529.6	38097.6	44253.8	56409.1	41481.3	0	34204.1	7956.29	0	28944.7
P22006	2	2	182.45	0.173075	11.3885	Young	Old	Seminal vesicle secretory protein 2 OS=Rattus norvegicus GN=Svs2 PE=1 SV=1	0	0	0	0	0	0	0	2	0	0	0	0	0	0	0	0	0	0	1991.22	26352.2	26341.3	5479.47	66862.7	49222	12739.1	1.41459e+06	52366.3	10663.9	43554.8	5999.31	27635.7	9578.94	0	17350.2	12545.2	5716.07
Q9EQS0	1	1	99.47	0.173885	32.2763	Old	Young	Transaldolase OS=Rattus norvegicus GN=Taldo1 PE=1 SV=2	0	0	0	0	0	0	0	0	0	0	0	0	0	0	1	0	0	0	3054.62	2182.26	36.9644	1910.49	0.0917643	1177.66	0	0	4739.61	1305.54	204.493	2063.32	0	5022.56	259153	1419.34	0	3904.25
P35444	2	2	123.47	0.174685	11.3054	Young	Old	Cartilage oligomeric matrix protein OS=Rattus norvegicus GN=Comp PE=1 SV=1	0	0	0	0	0	0	4	3	5	0	0	0	0	0	0	0	0	0	108961	13098.2	417798	17891.2	26462.7	25.9806	1.54465e+06	1.03032e+06	1.70681e+06	1793.61	2695.69	7672.07	5263.5	125627	20268.9	149419	125753	18795.3
Q63199	1	1	34.24	0.179767	3.64832	Young	Old	Tumor necrosis factor receptor superfamily member 6 OS=Rattus norvegicus GN=Fas PE=2 SV=1	0	0	0	0	0	0	1	0	0	0	0	0	0	0	0	0	0	0	7694.13	9563.66	2839.32	302.245	19018.6	18655.1	38032.5	2895.18	0	3977.67	4004.92	0	415.585	1658.52	11469.6	2313.14	0	3849.23
P23377	1	1	39.93	0.187832	1.63576	Old	Young	Furin OS=Rattus norvegicus GN=Furin PE=1 SV=1	1	0	0	0	0	0	0	0	0	0	0	0	0	0	0	0	0	1	107043	9718.57	73663.4	46644.8	19485.1	73763.7	113821	180038	131128	57604.8	34111.7	48405.8	43447.7	366191	126724	227645	205855	85778.1
Q9ESS6	2	2	30.04	0.193296	3.75151	Young	Old	Basal cell adhesion molecule OS=Rattus norvegicus GN=Bcam PE=2 SV=1	1	0	0	0	0	2	0	0	0	0	0	0	0	0	0	0	0	0	97074.8	42892	35147.9	34209.7	16086.9	317398	482727	16589.2	553646	134282	24055	60085.2	32478.1	28413.9	27042.5	18037	21413.6	45738.1
Q5M876	1	1	19.82	0.194111	3.08519	Old	Young	Aspartoacylase-2 OS=Rattus norvegicus GN=Acy3 PE=2 SV=1	0	0	0	0	0	1	0	0	0	0	0	0	0	0	0	0	0	0	62263.3	53028.1	20752.1	69829	33105	97683.3	15338	96.5782	9322.04	2339.83	58073.6	199327	308956	23669.2	26057.4	211173	256441	27619.3
B5DFC9	5	5	193.08	0.200928	1.1773	Young	Old	Nidogen-2 OS=Rattus norvegicus GN=Nid2 PE=2 SV=1	0	0	0	0	1	0	1	2	4	0	1	0	0	0	0	0	0	0	245037	609216	152055	599569	440700	145588	1.52822e+06	645185	1.74368e+06	298852	249526	98276.6	113595	133491	137528	190934	316165	72209.2
Q63678	2	2	169.32	0.204788	21.3438	Old	Young	Zinc-alpha-2-glycoprotein OS=Rattus norvegicus GN=Azgp1 PE=2 SV=1	0	0	0	0	0	0	0	0	0	1	0	0	0	0	0	0	3	0	6701.8	0	43784.1	0	93.7764	0	0	2023.34	520.969	14864.7	11068	1619.33	637.393	0	4598	39644.5	1.06144e+06	0
P01830	1	1	33.29	0.224378	8.77317	Young	Old	Thy-1 membrane glycoprotein OS=Rattus norvegicus GN=Thy1 PE=1 SV=1	1	0	0	1	0	1	1	0	1	0	0	0	0	0	0	0	0	0	387895	42653.1	9639.52	204734	16352.4	395339	90778.7	15462.5	125406	15322.7	19310.9	46433.2	27615.2	6014.31	7482.95	2760.58	114.293	19920.9
O08629	1	1	14.98	0.22523	1.50721	Old	Young	Transcription intermediary factor 1-beta OS=Rattus norvegicus GN=Trim28 PE=1 SV=2	0	0	0	0	0	0	0	0	0	0	1	0	0	0	0	0	0	0	585150	1.41209e+06	659866	116761	1.9375e+06	267911	180770	194498	352211	2.14791e+06	2.21508e+06	2.91485e+06	2.32269e+06	198702	2.93278e+06	1.23759e+06	3.69866e+06	436557
P45479	1	1	47.89	0.238293	1.15888	Old	Young	Palmitoyl-protein thioesterase 1 OS=Rattus norvegicus GN=Ppt1 PE=1 SV=1	0	0	0	0	0	0	0	0	2	0	0	0	0	0	0	1	0	0	7498.2	74.9284	7596.01	2649.67	194098	51087	58531.2	7300.16	80809.1	20335.9	18931.4	4575.08	8515.55	23971.9	113750	151711	29856.4	66018.1
Q62968	1	1	17.41	0.240589	36.1936	Old	Young	Sodium channel protein type 10 subunit alpha OS=Rattus norvegicus GN=Scn10a PE=1 SV=1	0	0	0	0	0	0	0	0	0	0	0	0	0	0	0	0	1	0	1471.61	0	23.5242	0	0	6115.05	8789.28	9771.09	41214.4	0	0	0	6202.39	0	0	0	4.00672e+06	0
Q63788	1	1	13.08	0.268502	1.31371	Young	Old	Phosphatidylinositol 3-kinase regulatory subunit beta OS=Rattus norvegicus GN=Pik3r2 PE=2 SV=1	0	0	0	0	0	0	0	0	0	0	0	1	0	0	0	0	0	0	49467.8	142552	101235	169811	129425	75445.7	35518.9	14036.6	1077.23	75255.2	48212.3	161135	99506.7	20814.5	111685	156.227	62506.7	10329.6
Q4V897	1	1	13.05	0.27242	3.34349	Old	Young	Coiled-coil domain-containing protein 90B, mitochondrial OS=Rattus norvegicus GN=Ccdc90b PE=2 SV=1	1	0	0	0	0	0	0	0	0	0	0	0	0	0	0	0	0	0	1.0408e+06	1.56189e+06	799073	7.29961e+06	1.42019e+06	5.82773e+06	4.39253e+06	3.10791e+06	5.65018e+06	3.14162e+06	2.82077e+06	4.07756e+06	4.99696e+06	1.80175e+07	1.13611e+07	3.81298e+07	1.16425e+07	1.22071e+07
P83858	1	1	13.33	0.276225	8.01408	Old	Young	Pyroglutamylated RFamide peptide receptor OS=Rattus norvegicus GN=Qrfpr PE=2 SV=1	0	0	0	0	0	0	1	0	0	0	0	0	0	0	0	0	0	0	33056	6407.97	84132.4	28453.3	25885.9	28993.2	244497	334948	41570.5	71614	27198.8	880854	482046	204775	3488.5	5.07834e+06	27542.4	59327.7
Q63317	1	1	34.95	0.279224	1.34364	Old	Young	Lymphocyte antigen 6B OS=Rattus norvegicus GN=Ly6b PE=2 SV=1	0	0	0	0	0	0	0	0	0	0	0	1	1	0	1	0	0	1	106029	147534	47107.1	115272	73998.6	181101	146736	130145	121926	44894.6	37936.3	375352	197602	4415.71	135947	0	300.691	355581
P07897	1	1	21.5	0.282265	3.53836	Old	Young	Aggrecan core protein OS=Rattus norvegicus GN=Acan PE=1 SV=2	0	0	0	0	0	0	0	1	0	0	0	0	0	0	0	0	0	0	43149.6	0	956.934	0	669.968	0	0	169420	45913	0	731.369	0	0.851048	0	863.682	0	0	113.06
P47967	4	3	170.45	0.286509	1.27402	Young	Old	Galectin-5 OS=Rattus norvegicus GN=Lgals5 PE=1 SV=2	0	0	0	0	1	0	0	0	1	0	0	2	3	0	0	0	0	0	80301.7	124755	45478	119508	154996	38716.6	6493.16	4857.24	155958	9816.44	37178.3	276318	210215	16702	68.3352	618.258	15948.8	685.125
D3ZZ80	1	1	13.6	0.295215	3.41362	Old	Young	Obscurin-like protein 1 OS=Rattus norvegicus GN=Obsl1 PE=2 SV=3	0	0	0	0	0	0	0	0	0	0	0	0	0	0	0	0	0	1	177973	69240.1	124111	824640	152778	1.42614e+06	142232	13927.1	35776.5	701652	235979	1.66876e+06	348907	32711.2	1.09156e+06	41909	65474.4	6.23736e+06
Q64268	1	1	99.07	0.296748	22.1345	Old	Young	Heparin cofactor 2 OS=Rattus norvegicus GN=Serpind1 PE=2 SV=1	0	0	0	0	0	0	0	0	0	0	0	0	0	0	0	0	3	0	84.2522	0	0	0	0	25381.5	0	1.96965	0	0	0	0	415.293	0	1847.84	0	541872	19580.5
P02783	2	2	160.21	0.296754	2.48984	Young	Old	Seminal vesicle secretory protein 4 OS=Rattus norvegicus GN=Svs4 PE=1 SV=1	0	0	0	0	0	0	2	2	1	0	0	0	0	0	0	0	0	0	11900.7	7934.26	48649.2	28747.4	48191.8	100668	730437	1.91251e+06	157022	25667.5	25541.4	9559.47	9616.93	77814.9	46516.7	28566.7	28597.8	70246.3
P25304	1	1	30.75	0.302576	3.48239	Young	Old	Agrin OS=Rattus norvegicus GN=Agrn PE=1 SV=2	0	0	0	0	0	0	1	0	0	0	0	0	0	0	0	0	0	1	574.342	34217	5433.55	359.338	2318.22	9514.07	23436.7	604.553	0	186.74	935.496	2160.88	1320.57	0	0	1.99264	0	8954.9
Q920E1	1	1	13.11	0.307022	8.65988	Young	Old	Proteinase-activated receptor 3 OS=Rattus norvegicus GN=F2rl2 PE=2 SV=1	0	0	0	1	0	0	0	0	0	0	0	0	0	0	0	0	0	0	336.274	8153.57	1682.56	50715.8	2059.45	19646.3	0	23.7325	0	197.459	959.703	3018.42	3820.54	0	101.09	1549.76	0	14.9286
O35806	1	1	40.41	0.307452	3.87611	Young	Old	Latent-transforming growth factor beta-binding protein 2 OS=Rattus norvegicus GN=Ltbp2 PE=2 SV=1	0	0	0	0	0	0	1	0	0	0	0	0	0	0	0	0	0	0	1419.12	3562.74	1007.69	0	6967.65	6640.09	61882.3	2450.46	0	1076.37	0	7795.65	2409.73	0	3122.21	3408.36	0	4850.51
Q62740	2	2	61.57	0.309414	4.28391	Young	Old	Secreted phosphoprotein 24 OS=Rattus norvegicus GN=Spp2 PE=2 SV=2	0	0	0	0	0	0	0	0	1	0	1	0	0	0	0	0	0	0	6644.11	9019.57	13500.2	40492.7	12679.8	16073.3	1722.42	4551.16	180301	2558.81	21578.8	5687.86	19567.6	0	3762.01	1022.8	0	10410.1
P24464	1	1	30.36	0.316275	16.126	Old	Young	Cytochrome P450 4A12 OS=Rattus norvegicus GN=Cyp4a12 PE=2 SV=2	0	0	0	0	0	0	0	0	0	0	0	0	2	0	0	0	0	0	5474.09	105951	19479.6	23382.3	68068.4	440.005	0	0	4614.42	558793	524265	931992	604070	0	512600	5693.11	0	582778
Q9WTQ2	1	1	31.11	0.330565	Infinity	Old	Young	Podocalyxin OS=Rattus norvegicus GN=Podxl PE=1 SV=2	0	0	0	0	0	0	0	0	0	0	0	0	0	1	0	0	0	0	0	0	0	0	0	0	0	0	0	0	0	0	0	57374.5	0	0	0	0
P36376	2	1	153.84	0.343482	3.3518	Old	Young	Glandular kallikrein-12, submandibular/renal OS=Rattus norvegicus GN=Klk12 PE=2 SV=1	1	0	0	0	0	0	5	3	3	1	1	2	3	4	3	6	0	0	841048	184415	341050	1.38762e+06	432766	159714	1.78034e+06	1.89547e+06	772636	702133	702685	2.1884e+06	1.78354e+06	1.04816e+07	4.44731e+06	4.70997e+06	1.14139e+06	136356
Q3KRD8	1	1	16.04	0.347481	21.1143	Young	Old	Eukaryotic translation initiation factor 6 OS=Rattus norvegicus GN=Eif6 PE=2 SV=1	0	0	0	0	0	0	0	0	1	0	0	0	0	0	0	0	0	0	146.492	279.007	0	0	484.657	0	9087.88	88086.3	55707	1642	0	1995.1	0	0	0	2702.55	0	944.098
P49744	1	1	93.46	0.350722	1.77907	Old	Young	Thrombospondin-4 OS=Rattus norvegicus GN=Thbs4 PE=2 SV=1	0	0	0	0	0	0	2	1	0	0	0	0	0	0	0	0	0	0	7541.42	16455.6	5710.84	134.112	9287.64	0	53293.7	42284.4	9966.06	4444.32	1463.48	1904.19	1092.74	0	3159.7	609.884	0	3785.22
Q5XI46	1	1	14.62	0.393757	24.6466	Young	Old	Uncharacterized protein C10orf88 homolog OS=Rattus norvegicus PE=2 SV=1	0	0	0	1	3	0	0	0	0	0	0	0	0	0	0	0	0	0	0	364205	0	896525	255118	0	0	6916.56	0	0	919.91	0	3020.83	0	0	0	20.5278	1236.86
Q5I6B8	1	1	16.55	0.412776	1.74743	Young	Old	Phosphatidylinositol 4-phosphate 5-kinase type-1 gamma OS=Rattus norvegicus GN=Pip5k1c PE=1 SV=1	0	0	0	0	0	0	0	0	0	0	0	0	0	0	0	0	1	0	12108	195983	5794.76	45042.8	287849	14301.2	8864.69	639161	780291	1325.7	46439.3	8503.36	10064.8	96918.6	4128.91	218312	703461	39383.1
P11232	1	1	51.96	0.420078	1.07901	Young	Old	Thioredoxin OS=Rattus norvegicus GN=Txn PE=1 SV=2	1	0	0	0	0	0	0	0	0	0	0	0	0	0	0	0	0	0	229201	56721.6	99064.3	62881.4	131389	200506	131931	18664.2	33925.7	12781	15416.2	21471.4	42647.8	384472	72427.9	182978	8442.66	141134
P07150	2	2	126.91	0.428325	25.5813	Old	Young	Annexin A1 OS=Rattus norvegicus GN=Anxa1 PE=1 SV=2	0	0	0	0	0	0	0	0	0	0	0	0	0	0	3	0	0	0	3761.24	853.73	3960.51	1600.1	3362.22	67.1814	0	0	300.455	0	19012.2	1896.38	11321.6	0	365865	31061.7	384.82	3367.33
Q09030	1	1	90.12	0.4334	88.3405	Young	Old	Trefoil factor 2 OS=Rattus norvegicus GN=Tff2 PE=2 SV=1	0	0	0	0	0	4	5	7	6	0	0	0	0	0	0	0	0	0	3194.83	0	10159	0	1651.51	271852	1.19947e+06	5.3026e+06	5.99088e+06	2087.69	150.284	1673.03	14663.7	407.195	3224.68	106303	2511.74	0
Q8VD89	4	4	309.46	0.436789	1.55944	Young	Old	Ribonuclease pancreatic gamma-type OS=Rattus norvegicus PE=3 SV=1	1	0	0	11	0	0	0	0	0	0	0	2	1	0	0	0	0	0	111671	133896	73016.2	1.38899e+06	185341	23165.2	13869.2	127902	108178	90808.1	55239.3	170722	182629	102693	288898	80221.8	87592.5	200763
Q9Z0W7	1	1	54.17	0.442363	22.1974	Young	Old	Chloride intracellular channel protein 4 OS=Rattus norvegicus GN=Clic4 PE=1 SV=3	0	0	0	1	0	0	0	0	0	0	0	0	0	0	0	0	0	0	0	0	40.4972	25702.8	0	0	0	0.553702	0	0	6.02299	39.2082	41.5062	0	0	11.0601	0	58.9482
D3ZCL3	1	1	19.47	0.443959	2.76371	Old	Young	U1 small nuclear ribonucleoprotein C OS=Rattus norvegicus GN=Snrpc PE=3 SV=1	0	0	0	0	0	0	0	0	0	0	0	0	0	0	0	1	0	0	165726	499883	257727	36116.8	662319	232657	142453	60222.3	126980	347908	665844	657052	769195	33.6377	142905	3.29173e+06	0	194251
Q8K3Y6	1	1	17.78	0.462842	26.2328	Old	Young	Zinc finger CCCH-type antiviral protein 1 OS=Rattus norvegicus GN=Zc3hav1 PE=1 SV=1	0	0	0	0	0	0	0	0	0	0	0	0	0	0	0	0	1	0	0	0	0	129.092	0	0	6376.8	571.506	853.746	107.666	18509.4	1327.8	0	0	0.148981	0	610235	1085.52
Q9QYP2	1	1	29.2	0.466368	1.60352	Young	Old	Cadherin EGF LAG seven-pass G-type receptor 2 (Fragment) OS=Rattus norvegicus GN=Celsr2 PE=2 SV=1	0	0	0	1	0	0	0	0	0	0	0	0	0	0	0	0	0	0	0	403047	21273.6	714945	5744.04	15135.5	10961.8	37744.1	6385.47	14184.4	15267.7	61305.5	434588	7694.51	24050	11600.7	11653.7	13925.8
Q8JZQ0	1	1	106.94	0.468193	2.19516	Old	Young	Macrophage colony-stimulating factor 1 OS=Rattus norvegicus GN=Csf1 PE=2 SV=1	0	0	0	0	0	1	1	0	1	0	0	0	0	0	0	0	0	0	39367.6	61115.8	13114.3	53600.6	74445.1	108426	55002.7	29994.5	82304.7	32733.3	33669.4	61777.3	68868.3	0	51525.9	254.096	0	28437.6
Q3KRC4	1	1	128.97	0.484635	1.00721	Old	Young	G-protein coupled receptor family C group 5 member C OS=Rattus norvegicus GN=Gprc5c PE=2 SV=2	2	0	0	0	0	0	0	0	0	0	0	0	0	0	0	0	0	1	136714	22048.7	25984.2	3856.04	25557.6	576.071	1556.92	81.9034	0	199.826	1407.59	498.788	1318.79	6563.23	1704.11	11210.5	1736.48	186774
P83121	2	2	194.9	0.492392	7.10716	Young	Old	Urinary protein 3 OS=Rattus norvegicus PE=2 SV=1	0	0	0	0	2	0	0	0	0	0	0	0	0	0	0	0	0	0	17480.6	121550	149917	10513.1	703021	4526.63	7844.19	9770.98	16132.2	45375	41609.8	55377.1	80737	661987	40912.7	139834	52650.4	54867.7
Q10758	3	1	137.14	0.508178	4.97689	Old	Young	Keratin, type II cytoskeletal 8 OS=Rattus norvegicus GN=Krt8 PE=1 SV=3	0	0	0	0	0	0	0	0	0	0	0	0	0	0	0	0	1	0	1.1045e+06	3.45983e+06	706268	53297.2	2.16825e+06	1.17034e+06	28176.1	43951.3	33060.2	157412	66824.5	322678	495355	13103.3	24348.7	10201.7	4.30234e+07	129102
Q6IV68	1	1	13.98	0.517803	1.05307	Young	Old	Fanconi anemia group D2 protein homolog OS=Rattus norvegicus GN=Fancd2 PE=2 SV=2	0	0	0	0	0	0	0	0	1	0	0	0	0	0	0	0	0	0	1.18532e+07	514702	5.83445e+06	2.08239e+07	1.66046e+07	3.853e+07	1.51663e+07	4.34839e+07	2.15943e+07	9.00567e+06	5.04676e+06	6.89793e+06	8.54879e+06	2.37037e+07	2.40215e+07	5.87447e+07	1.38645e+06	1.61078e+07
Q4KLZ6	1	1	26.74	0.524146	1.27153	Young	Old	Bifunctional ATP-dependent dihydroxyacetone kinase/FAD-AMP lyase (cyclizing) OS=Rattus norvegicus GN=Dak PE=1 SV=1	0	0	0	1	0	0	0	0	0	0	0	0	0	0	0	0	0	0	2706.87	0	1222.4	78023.9	3003.42	12758.5	1405.81	16387.6	6970.07	11738.9	5152.13	10059.8	5820.65	20.5524	17837.7	46489.9	0	6921.06
Q9WUW3	1	1	227.16	0.524267	12.4481	Old	Young	Complement factor I OS=Rattus norvegicus GN=Cfi PE=2 SV=1	0	0	0	0	0	0	0	0	0	0	0	0	0	0	0	0	2	0	0	90150.4	2489.86	3404.65	58.7807	38.754	3403.89	670.298	5308.93	190.076	0	0	22.848	13334.3	90.2695	42.9287	1.31676e+06	1560.85
Q9Z1Y3	2	2	117.45	0.531505	1.85914	Young	Old	Cadherin-2 OS=Rattus norvegicus GN=Cdh2 PE=1 SV=1	1	0	0	0	0	0	1	1	2	1	1	0	0	0	0	0	0	0	7825.96	3985.96	7195.89	0	29765.2	0	62206.4	97277.7	123932	27323.7	43634.5	28214.9	23095.4	328.174	0	43050.9	2067.71	2535.95
P62193	1	1	18.6	0.558347	2.31456	Young	Old	26S protease regulatory subunit 4 OS=Rattus norvegicus GN=Psmc1 PE=2 SV=1	0	0	0	1	0	0	0	0	0	0	0	0	0	0	0	0	0	0	75.9689	214975	11268.2	171566	213051	0	25.6124	7754.21	1486.9	24883.6	39957.6	72388	39366.1	17567.5	1375.22	33600.3	36637.6	4274.84
P04897	2	2	82.34	0.558914	2.92979	Young	Old	Guanine nucleotide-binding protein G(i) subunit alpha-2 OS=Rattus norvegicus GN=Gnai2 PE=1 SV=3	2	0	0	0	0	0	0	0	0	0	0	0	0	0	0	0	0	0	139068	6271.72	96567.9	32212.7	3611.79	0	114721	160069	7320.64	1207.96	17579.1	17371.4	7498.1	4097.18	7308.74	40077.6	0	3950.93
Q7TP90	1	1	18.76	0.580903	1.36034	Young	Old	Arrestin domain-containing protein 4 OS=Rattus norvegicus GN=Arrdc4 PE=2 SV=1	0	0	0	0	0	0	0	0	0	0	0	1	0	0	0	0	0	0	13411.1	67687.9	201656	399941	3737.79	441894	2.85521e+06	3.6029e+06	2.03567e+06	79776.9	803713	1.05323e+06	2.47643e+06	1.35915e+06	866889	8422.57	0	413869
Q9ESQ7	1	1	21.18	0.582812	2.40258	Old	Young	PH and SEC7 domain-containing protein 1 OS=Rattus norvegicus GN=Psd PE=2 SV=1	0	0	0	0	0	0	0	0	0	0	0	0	0	0	0	1	0	1	118398	46669.5	42493.5	208396	29508.7	363343	338478	352620	245729	510247	437004	393799	240394	5250.66	332294	1.74279e+06	200.92	524521
Q4V7C9	1	1	23	0.586942	1.85393	Old	Young	NF-kappa-B-activating protein OS=Rattus norvegicus GN=Nkap PE=2 SV=1	0	0	0	0	0	0	0	0	0	0	0	1	0	0	0	0	0	0	304608	211001	140700	68282.3	225294	238266	434222	256349	3.7815e+06	603321	487180	4.7929e+06	2.31425e+06	17988.5	1.11485e+06	42570.4	30909.7	1.12152e+06
Q05764	1	1	23.88	0.589811	4.10742	Young	Old	Beta-adducin OS=Rattus norvegicus GN=Add2 PE=2 SV=4	0	0	0	0	0	2	0	0	0	0	0	0	0	0	0	0	0	0	56294.9	3932.88	27834.6	717673	0	2.34122e+06	23260.5	1.4945	23105.8	241719	124883	326922	107548	0	48304	0	0	10985.3
P50116	5	5	358.41	0.590365	3.48962	Old	Young	Protein S100-A9 OS=Rattus norvegicus GN=S100a9 PE=1 SV=3	0	0	0	0	0	0	0	0	0	1	2	0	1	0	8	0	0	0	141134	49168.5	144650	46426.3	21746.5	27943.2	233062	40370.6	8519.88	262685	195161	136109	88097.1	56264.6	2.20703e+06	384.157	2178.54	14885.4
P30152	1	1	101.44	0.59201	4.85099	Old	Young	Neutrophil gelatinase-associated lipocalin OS=Rattus norvegicus GN=Lcn2 PE=1 SV=2	0	0	0	0	0	0	0	0	0	0	2	0	2	0	0	0	0	0	956.853	20841.1	13213.8	44157.5	53550.6	43146.6	3501.56	3551.74	290.874	17500.4	262767	44019.5	546045	0	13597.7	788.294	0	4034.6
Q9R1M7	1	1	20.87	0.593901	1.32229	Old	Young	Glutamate receptor ionotropic, NMDA 3A OS=Rattus norvegicus GN=Grin3a PE=1 SV=1	0	0	0	0	0	0	0	0	0	0	0	0	1	0	0	0	0	0	31.4994	2427.76	20382.8	66212	35257.8	102052	78.3179	22131.1	103389	100720	85966.1	91798.6	52842.8	0	37846.2	5.38323	13.489	15381.1
Q5M929	1	1	35.51	0.595955	3.67087	Old	Young	E3 ubiquitin-protein ligase RNF135 OS=Rattus norvegicus GN=Rnf135 PE=2 SV=1	0	0	0	0	1	0	0	0	0	0	0	0	2	0	0	0	0	0	152.145	140467	65817.1	185189	167710	231359	3869.68	15966.3	93002.8	988992	861084	646925	584360	0	217671	374.275	0	17347.3
Q62689	1	1	13.43	0.608899	340.215	Old	Young	Tyrosine-protein kinase JAK2 OS=Rattus norvegicus GN=Jak2 PE=2 SV=1	0	0	0	0	0	0	0	0	0	0	1	0	0	0	0	0	0	0	0	0	0	0	42.5919	0	0	0	0	0	14490.4	0	0	0	0	0	0	0
Q63751	1	1	89.41	0.620207	1.24779	Old	Young	Vomeromodulin (Fragment) OS=Rattus norvegicus PE=2 SV=1	1	0	0	0	0	0	0	0	3	1	0	0	0	0	2	0	0	0	566834	81720.7	479809	107978	6029.96	26063.4	49734	7294.7	219770	192904	188962	39711.1	21820.6	289028	818070	40159.9	7944.89	0
Q63150	1	1	17.76	0.625149	2.86886	Old	Young	Dihydropyrimidinase OS=Rattus norvegicus GN=Dpys PE=1 SV=2	0	0	0	0	0	0	0	0	0	0	0	0	0	0	1	0	0	0	12327	0	991.556	341239	4957.59	34304.8	310305	91938	280608	589333	394131	618746	214730	3698.49	1.04928e+06	24554.5	37.6626	431127
P52759	1	1	92.69	0.626494	1.97416	Young	Old	Ribonuclease UK114 OS=Rattus norvegicus GN=Hrsp12 PE=1 SV=3	0	0	0	1	0	0	0	0	0	0	1	0	0	0	0	0	0	0	14070.1	231565	17555.1	167509	66589.5	136225	514.569	11959.6	2766.42	12063.8	152201	7834.47	30986.5	174643	119332	110.075	7640.54	85664.7
Q62784	1	1	28.26	0.626609	19.1215	Young	Old	Type I inositol 3,4-bisphosphate 4-phosphatase OS=Rattus norvegicus GN=Inpp4a PE=1 SV=1	1	0	0	0	0	0	0	0	0	0	0	0	0	0	0	0	0	0	3.11514e+06	0	0	0	0	7478.29	276242	0	7240.54	3494.9	3027.47	0	0	37680.9	11470.8	12393	70972.8	0
O55164	1	1	17.06	0.629763	9.56639	Young	Old	Multiple PDZ domain protein OS=Rattus norvegicus GN=Mpdz PE=1 SV=1	0	0	0	0	0	0	0	0	0	0	0	0	0	0	1	0	0	0	6975.11	0	613411	13819.5	18272.6	12287.3	122.842	423.85	99.8006	12574.7	14510.4	4332.58	18613.3	3.07888	32189.9	173.383	0	3552.32
Q6BDS1	1	1	32.25	0.63135	26.7812	Old	Young	Transcription factor PU.1 OS=Rattus norvegicus GN=Spi1 PE=2 SV=1	0	0	0	0	0	0	0	0	0	0	0	0	0	0	0	0	1	0	57367.4	6488.6	39814.2	180301	15579.2	83658.1	30152.4	70605.3	35060.7	66120.4	25495	63136.3	13986.2	37242.6	27643.8	13104.8	1.9952e+07	37809.1
Q9JIH7	1	1	22.17	0.638389	2.01898	Young	Old	Serine/threonine-protein kinase WNK1 OS=Rattus norvegicus GN=Wnk1 PE=1 SV=2	0	0	0	1	2	1	0	0	0	0	0	0	0	0	1	0	0	0	59940.2	236949	25167.6	94379.5	173763	79149.4	0	879.341	0	89455.9	41159.8	131491	40867.1	8316.63	20672.4	0	0	0
P56603	1	1	21.23	0.643238	1.6186	Young	Old	Secretory carrier-associated membrane protein 1 OS=Rattus norvegicus GN=Scamp1 PE=1 SV=1	0	0	0	0	0	0	0	0	1	0	0	0	0	0	0	0	0	0	0	1507.65	44271.5	3262.95	341.273	3751.37	8111.26	0	638349	5253.72	8376.2	3042.96	3558.72	541.623	19942.3	383469	0	8038.25
Q3B8N8	1	1	29.36	0.644499	3.71172	Young	Old	Pescadillo homolog OS=Rattus norvegicus GN=Pes1 PE=2 SV=1	2	0	0	0	0	0	0	0	0	0	0	0	0	0	0	0	0	0	3.43262e+06	0	298571	24594	0	25644.7	25458.5	332367	88646.7	237692	65902.6	37992.4	5734.72	9410.61	819914	5491.99	4702.18	7462.12
Q6GX84	1	1	44.86	0.649046	1.91687	Young	Old	Fidgetin-like protein 1 OS=Rattus norvegicus GN=Fignl1 PE=2 SV=1	1	0	0	0	0	0	0	0	0	0	0	0	0	0	0	0	0	0	31611.1	12.2522	18839.4	3061.5	624.756	0	0	0	11463.2	903.445	428.049	1293.71	0	30271.4	0	0	0	1332.19
Q9QZA2	1	1	19.82	0.668226	2.99915	Young	Old	Programmed cell death 6-interacting protein OS=Rattus norvegicus GN=Pdcd6ip PE=1 SV=2	1	0	0	0	0	0	0	0	0	0	0	0	0	0	0	0	0	0	295935	0	72862.5	0	0	59401.4	38791.4	7658.84	0	0	2386.62	22511.2	0	80888.8	1468.54	41553.8	6745.68	2706.56
O35142	1	1	17.07	0.686759	4.3246	Old	Young	Coatomer subunit beta' OS=Rattus norvegicus GN=Copb2 PE=1 SV=3	2	0	0	0	0	0	0	0	0	0	0	0	0	0	0	0	0	0	78569.4	3452.56	67169.8	4005.62	8908.12	51801.2	36456.2	15424.4	9195.38	22811	18972.4	4598.69	6944.21	541602	669472	24127.2	4666.43	6461.06
Q5PQP9	1	1	22.03	0.691827	2.16249	Old	Young	Armadillo repeat-containing protein 5 OS=Rattus norvegicus GN=Armc5 PE=2 SV=1	0	0	0	0	0	0	0	0	0	0	0	0	0	0	0	0	0	0	108155	0	1625.03	0	0	0	26052.8	94.1014	0	1581.98	0	0	0	12634.2	66086.2	0	0	64830.2
P52590	1	1	17.48	0.703047	3.85922	Old	Young	Nuclear pore complex protein Nup107 OS=Rattus norvegicus GN=Nup107 PE=1 SV=1	0	0	0	0	0	0	0	0	0	0	0	0	0	0	0	0	0	1	38101.5	36177	23352.8	386194	5789.6	827868	0	0	300.495	13637.9	11212.5	118577	60999.9	21642	1262.21	760.505	0	4.85753e+06
Q62969	1	1	15.71	0.70978	5.16783	Old	Young	Prostacyclin synthase OS=Rattus norvegicus GN=Ptgis PE=2 SV=1	0	0	0	0	0	0	0	0	0	0	0	0	0	0	0	0	0	1	0	25351.7	13.9572	19.7105	348.5	0	0	0	0	396.809	0	0	0	8.63336	0	0	7502.37	125080
O55004	2	2	149.28	0.710962	1.06299	Old	Young	Ribonuclease 4 OS=Rattus norvegicus GN=Rnase4 PE=1 SV=1	0	0	0	3	0	1	0	0	0	0	0	0	0	0	0	0	0	1	23360.2	20079.2	20883.2	191912	49182.7	231903	31841.2	6225.72	44301.3	18443.7	12820.4	24087.4	18909.5	165035	3196.52	40246.5	8429.27	243079
P97605	1	1	14.74	0.712045	1.21655	Young	Old	Ephrin-A5 OS=Rattus norvegicus GN=Efna5 PE=1 SV=2	0	0	0	0	0	0	0	0	1	0	0	0	0	0	0	0	0	0	789.37	475.066	1949.44	20229	277.776	4367.79	0	85.5956	24948.8	11442.7	11775.3	8918.58	6054.14	0	789.578	2.02978	0	4684.41
Q9WTT6	1	1	26.32	0.713057	8.77552	Young	Old	Guanine deaminase OS=Rattus norvegicus GN=Gda PE=1 SV=1	0	0	0	1	0	0	0	0	0	0	0	0	0	0	0	0	0	0	0	0	4433.9	794978	102235	1014.11	0	0	0	231.218	1570.54	1456.32	2480.92	17076.1	0	35870.9	0	0
Q568Z6	1	1	54.13	0.723806	1.17359	Old	Young	IST1 homolog OS=Rattus norvegicus GN=Ist1 PE=2 SV=1	0	0	0	0	0	0	0	1	0	0	0	0	0	0	0	0	0	0	64687.2	2852.87	42920.1	30582.6	1297.27	67141.7	20066.4	110598	25055.9	23634.8	14594.2	35164.8	19379.8	6930.7	22441.4	264688	10395.5	31342.5
Q8CIY2	1	1	18.9	0.750672	3.51121	Young	Old	Dual oxidase 1 OS=Rattus norvegicus GN=Duox1 PE=1 SV=1	0	0	0	0	0	0	1	0	0	0	0	0	0	0	0	0	0	0	57020.3	1883.84	17425.9	5382.4	16129.5	0	328430	19806.4	306412	2406.12	8452.34	19298.5	14156.3	30050.3	23401.1	35052.8	4055.99	85174.1
Q8CH34	1	1	22.55	0.759008	12.8125	Old	Young	Zona pellucida sperm-binding protein 4 OS=Rattus norvegicus GN=Zp4 PE=2 SV=1	0	0	0	0	0	0	0	0	0	0	0	0	0	0	0	0	1	0	194759	60614.8	73481	57427	43141	43361.3	516076	36698.5	98143.9	84145.8	50017.1	19173.3	18461.1	64403.1	22229.4	21880.7	1.36036e+07	67662.7
Q9JHY1	4	4	390.17	0.761606	1.45098	Young	Old	Junctional adhesion molecule A OS=Rattus norvegicus GN=F11r PE=2 SV=1	0	0	0	0	0	0	5	4	14	0	0	0	0	1	0	0	0	7	299944	744491	79478.3	575620	631662	1.06779e+06	2.72913e+06	3.23638e+06	5.76028e+06	414746	468455	340514	262038	2.04147e+06	979623	2.21966e+06	715179	3.10624e+06
P02680	3	3	145.33	0.769207	2.19734	Old	Young	Fibrinogen gamma chain OS=Rattus norvegicus GN=Fgg PE=1 SV=3	0	0	0	0	0	0	0	1	0	0	0	0	0	0	4	3	0	0	2591.37	178733	17390.3	248991	166484	57167.7	35419.9	86984	62731.5	113019	163353	53954.1	163282	0	608157	641678	10620.3	361876
Q5TKR9	1	1	17.01	0.770597	4.0143	Old	Young	Histone acetyltransferase KAT6A OS=Rattus norvegicus GN=Kat6a PE=1 SV=2	0	0	0	0	0	1	0	0	0	0	0	0	0	0	0	0	0	0	1.40962e+06	1.08185e+06	660668	1.37688e+06	869947	2.00988e+06	1.31524e+06	1.48058e+06	2.17431e+06	3.06574e+06	2.33504e+06	1.03856e+07	5.69363e+06	75696.2	7.97527e+06	1.09485e+07	4315.74	9.2779e+06
P48500	3	3	168.31	0.77738	2.29732	Old	Young	Triosephosphate isomerase OS=Rattus norvegicus GN=Tpi1 PE=1 SV=2	0	0	0	5	0	0	0	0	0	0	0	0	0	0	0	0	0	0	6464.57	85569	31340.8	258428	63632.9	17543.7	1194.53	930.331	13882.8	44917.9	61163.6	23075.5	32477.4	783.096	79755.9	5923.54	0	33017.4
O70248	1	1	23.06	0.800336	1.75116	Young	Old	Amyloid beta A4 precursor protein-binding family A member 3 OS=Rattus norvegicus GN=Apba3 PE=2 SV=2	0	0	0	0	1	0	0	0	0	0	0	0	0	0	0	0	0	0	261.227	48010.2	12839.6	168369	43184.4	6117.94	6.17983	9711.98	53538.5	22513.9	10923.5	22282.5	19565.4	48.6368	12838.1	153.368	87.9286	99138.3
P62804	1	1	29.98	0.802254	1.37323	Young	Old	Histone H4 OS=Rattus norvegicus GN=Hist1h4b PE=1 SV=2	0	0	0	0	0	0	0	0	2	0	0	0	0	0	1	0	0	0	0	1049.41	0	0	4921.58	0	1469.5	16077	72073.4	22280	7376.69	0	0	0	30639.5	0	0	9314.24
Q63610	2	1	49.64	0.80347	7.44	Old	Young	Tropomyosin alpha-3 chain OS=Rattus norvegicus GN=Tpm3 PE=1 SV=2	0	0	0	0	0	0	0	0	0	0	0	0	0	0	2	0	0	0	7.63127	3410.06	1567.2	133.512	5605.88	232.766	0	0	1141.39	445.567	0	0	465.216	130.02	35585.8	23.8118	277.253	0
P24388	1	1	21.87	0.830916	1.09832	Young	Old	Corticotropin-releasing factor-binding protein OS=Rattus norvegicus GN=Crhbp PE=2 SV=1	0	0	0	0	0	0	0	2	1	0	0	0	0	0	0	0	0	0	201197	212707	44992.6	285533	247738	575281	730747	1.72332e+06	873371	564915	472514	508124	207398	762233	875466	2376.69	24778.1	1.0389e+06
Q76MT4	1	1	14.47	0.837031	2.11332	Old	Young	ESF1 homolog OS=Rattus norvegicus GN=Esf1 PE=1 SV=1	0	0	0	0	0	0	0	0	0	0	1	0	0	0	0	0	0	0	76.2272	472.572	49333.6	24.4893	122.727	96924.7	81811.1	164687	137335	207892	190958	243565	184779	0	160080	0	0	134450
Q6TUD4	1	1	17.75	0.853514	63.0061	Young	Old	Protein YIPF3 OS=Rattus norvegicus GN=Yipf3 PE=2 SV=1	0	0	0	0	0	0	0	1	0	0	0	0	0	0	0	0	0	0	8012.77	0	0	0	0	0	0	1.06856e+06	15941.8	10629.3	0	370.079	2655.83	0	0	0	0	62.71
Q6AXR4	1	1	72.02	0.857067	1.48645	Old	Young	Beta-hexosaminidase subunit beta OS=Rattus norvegicus GN=Hexb PE=2 SV=1	2	0	0	0	0	0	0	0	1	0	0	0	0	0	0	0	0	0	198768	33975.4	212121	34142.8	39986.9	145097	200486	362746	288568	180099	240431	207856	102275	125534	78943.4	101656	2.62645e+06	191273
Q641X3	1	1	38.99	0.869085	1.79951	Old	Young	Beta-hexosaminidase subunit alpha OS=Rattus norvegicus GN=Hexa PE=2 SV=1	1	0	0	0	0	0	0	0	0	0	0	0	0	0	0	0	0	0	111704	26416.8	78321.5	33027.9	27861.9	37490.1	12080.9	22916.9	17181.7	55682.3	43206.1	54408.4	27862.8	0	62652.1	73912	268277	67327.7
P10111	2	2	48.37	0.872124	1.2625	Old	Young	Peptidyl-prolyl cis-trans isomerase A OS=Rattus norvegicus GN=Ppia PE=1 SV=2	1	0	0	1	0	1	0	1	0	0	0	0	0	0	0	0	0	0	160150	364457	94335.2	206144	36825.2	324511	92369.5	349837	201047	104970	46973.1	33435	32940.2	433175	299875	994123	133530	166309
P06685	1	1	27.82	0.880478	1.3008	Young	Old	Sodium/potassium-transporting ATPase subunit alpha-1 OS=Rattus norvegicus GN=Atp1a1 PE=1 SV=1	0	0	0	0	0	0	0	0	0	0	0	0	0	0	0	0	0	1	363.287	0	11261.8	5497.49	351.806	12909.2	0	0	165.557	2655.51	1397.24	3071.97	3617.22	0	714.21	0	0	10935.8
Q920A6	1	1	38.92	0.896082	2.11978	Young	Old	Retinoid-inducible serine carboxypeptidase OS=Rattus norvegicus GN=Scpep1 PE=2 SV=1	1	0	0	0	0	0	0	0	1	0	0	0	0	0	0	0	0	0	88566.6	9884.84	24791	594.842	5671.79	17827.4	413.436	0	104153	16069.9	11993.4	15776.4	12701.3	0	36356.5	9857.76	0	11026.2
Q8CF82	1	1	13.47	0.906166	1.06075	Young	Old	ATP-binding cassette sub-family A member 5 OS=Rattus norvegicus GN=Abca5 PE=2 SV=1	0	0	0	0	0	0	0	0	0	0	0	0	0	0	0	0	0	0	9.71199e+06	2.87114e+07	6.79478e+06	5.04659e+07	2.97928e+07	2.9124e+07	9.74351e+06	5.10712e+07	1.06781e+07	1.74413e+07	1.76101e+07	3.43452e+07	3.39744e+07	1.6764e+07	3.36222e+07	2.98065e+07	2.59544e+07	1.05566e+07
O54952	1	1	16.36	0.916847	1.28338	Young	Old	Breast cancer type 1 susceptibility protein homolog OS=Rattus norvegicus GN=Brca1 PE=1 SV=1	0	0	0	1	0	0	0	0	0	0	0	0	0	0	0	0	0	0	650602	372914	296617	840437	153794	694567	508529	1.0745e+06	604873	484536	427961	743738	430936	7795.82	341979	1.28249e+06	1315.99	256046
A6N6J5	1	1	13.63	0.921118	3.322	Young	Old	WD repeat-containing protein 35 OS=Rattus norvegicus GN=Wdr35 PE=1 SV=1	1	0	0	0	0	0	0	0	0	0	0	0	0	0	0	0	0	0	747765	0	331193	0	42.1135	43088.4	0	9398.44	27603.8	54699.9	22215.9	16199.2	12235.1	0	210170	0	0	33392.9
O08628	2	2	108.33	0.928129	3.02743	Young	Old	Procollagen C-endopeptidase enhancer 1 OS=Rattus norvegicus GN=Pcolce PE=1 SV=1	0	0	0	0	0	0	0	2	2	0	0	0	0	0	0	0	0	1	89274.8	0	30900	417.868	3006.16	0	3008.05	52557.8	30707.7	14407.5	4198.92	5158.2	191.227	1744.97	3353.64	37863.3	12526.8	46443.1
Q00960	1	1	13.94	0.929838	3.70997	Young	Old	Glutamate receptor ionotropic, NMDA 2B OS=Rattus norvegicus GN=Grin2b PE=1 SV=1	0	0	0	0	0	0	1	0	0	0	0	0	0	0	0	0	0	0	2.61528e+07	4.03296e+06	3.25959e+07	697845	85901.9	1.72986e+06	3.55637e+07	21867.2	1.21369e+06	4.05423e+06	2.19021e+06	1.56228e+06	1.67827e+06	1.23104e+07	2.42704e+06	1.46318e+06	1.58895e+06	48730.5
Q6AYS7	2	2	45.52	0.941353	3.0815	Old	Young	Aminoacylase-1A OS=Rattus norvegicus GN=Acy1a PE=1 SV=1	0	0	0	0	0	2	0	0	0	0	0	0	0	0	0	0	0	0	157630	43868.6	25465.9	63442.4	43519.2	143932	11949.7	47788.2	40411.4	40505.2	26418.1	39629.1	29948.3	32867.8	52842.3	7571.79	1.49043e+06	62656.1
Q5U2Q3	1	1	36.26	0.94602	1.57612	Old	Young	Ester hydrolase C11orf54 homolog OS=Rattus norvegicus PE=1 SV=1	0	0	0	0	0	0	0	0	0	0	2	0	0	0	0	0	0	0	0	0	1868.93	4641.87	0	1491.67	0	43.8103	0	109.613	9557.22	898.714	2116.38	0	0	0	0	0
P15473	1	1	19.31	0.950168	1.70935	Old	Young	Insulin-like growth factor-binding protein 3 OS=Rattus norvegicus GN=Igfbp3 PE=1 SV=2	0	0	0	0	0	0	0	1	1	0	0	0	0	0	0	0	0	0	1662.4	46.3647	3017.13	20442.1	915.094	112.257	364910	545733	264351	5883.19	3102.19	7336.19	30496.7	0	9273.99	26467.2	402351	4265.04
Q4G075	1	1	20.87	0.963384	1.17098	Old	Young	Leukocyte elastase inhibitor A OS=Rattus norvegicus GN=Serpinb1a PE=2 SV=1	0	0	0	0	0	0	0	0	0	0	0	0	0	0	1	0	0	0	43094.7	6677.32	23058.7	3357.16	1318.8	0	0	10776.9	2257.19	2895.3	1319.7	2513.23	1811.26	39433.8	50262	0	0	7785.72
Q4QQV8	1	1	26	0.966456	1.86354	Young	Old	Charged multivesicular body protein 5 OS=Rattus norvegicus GN=Chmp5 PE=2 SV=1	0	0	0	0	0	0	0	1	0	0	0	0	0	0	0	0	0	0	47226	0	11497.1	17322	46927.5	5914.4	2219.76	275253	2044.89	20050	16.6531	4545.29	1278.15	121139	0	15062.7	2247.9	44511.5
Q6MG71	1	1	48.95	0.967786	1.06521	Young	Old	Choline transporter-like protein 4 OS=Rattus norvegicus GN=Slc44a4 PE=2 SV=1	1	0	0	0	0	1	0	1	2	0	0	0	0	1	1	1	0	1	35130.2	0	24854.4	12982.6	2697.17	79355.7	16747.5	120635	45906.4	13734.8	4409.01	11727.4	11367.4	133615	26084.8	60144.5	0	56517.2
P00714	1	1	108.48	0.96975	2.13696	Old	Young	Alpha-lactalbumin OS=Rattus norvegicus GN=Lalba PE=1 SV=1	1	0	0	0	0	0	0	0	0	1	1	2	1	0	0	0	0	0	37550.8	3996.41	16502	25325.4	2515.19	10494.9	0.496206	314.01	0	36083.7	28300.5	79018	59192.2	26.7025	3118.12	0	0	903.5
Q9EQV6	1	1	46.11	0.976131	1.71498	Young	Old	Tripeptidyl-peptidase 1 OS=Rattus norvegicus GN=Tpp1 PE=1 SV=1	3	0	0	0	0	0	0	0	0	0	0	0	0	0	0	0	0	0	92085.9	5175.08	3077	1849.92	371.056	3034.07	0	0	0	996.63	0	366.427	0	2.72136	19062.3	106.15	14883.1	0
P46413	1	1	13.19	0.987382	1.96956	Old	Young	Glutathione synthetase OS=Rattus norvegicus GN=Gss PE=1 SV=1	0	0	0	0	0	1	0	0	0	0	0	0	0	0	0	0	0	0	102666	41512.8	30939.6	18436.6	62055.6	51804.3	15455.1	1651.59	0	81075.9	68097.7	59849.6	27248.4	0	59542.2	164074	59585.3	124086
P34900	1	1	41.09	0.997656	3.85372	Young	Old	Syndecan-2 OS=Rattus norvegicus GN=Sdc2 PE=2 SV=2	1	0	0	0	0	0	0	0	0	0	0	0	0	0	0	0	0	0	291662	762.578	125946	2776.17	11945	6280.33	872.081	0	2438.1	15923.4	15336.8	17337.3	8017.32	20617	13699.1	20111	70.9167	5368.34
P51635	2	2	69.9	0.997889	1.11251	Old	Young	Alcohol dehydrogenase [NADP(+)] OS=Rattus norvegicus GN=Akr1a1 PE=1 SV=2	2	0	0	3	0	2	0	0	0	1	1	0	0	0	0	0	0	0	106765	32587	84421.8	318626	21887	97993.2	6341.29	45254.9	13787.5	164458	177758	13054	9901.02	12989.7	40832.4	324382	20977.3	68892.4
Q9JI92	1	1	56.18	0.999483	1.15438	Old	Young	Syntenin-1 OS=Rattus norvegicus GN=Sdcbp PE=1 SV=1	1	0	0	0	0	0	0	0	0	0	0	0	0	0	0	0	0	0	73779.9	0	11675.7	0	0	5005.49	7434.35	7531.39	5557.46	8313.81	4813.94	0	0	3160.8	48895.5	1428.47	0	59300.2

## Sheet: Shared proteins
Proteins shared in young and old rats									Spectral counts																		Normalized abundance
									Young									Old									Young									Old
Accession	Peptide count	Peptides used for quantitation	Confidence score	Anova (p)	Max fold change	Highest mean condition	Lowest mean condition	Description	Y1	Y2	Y3	Y4	Y5	Y6	Y7	Y8	Y9	O1	O2	O3	O4	O5	O6	O7	O8	O9	Y1	Y2	Y3	Y4	Y5	Y6	Y7	Y8	Y9	O1	O2	O3	O4	O5	O6	O7	O8	O9
P02770	49	49	7414.4	0.0050866	4.45351	Old	Young	Serum albumin OS=Rattus norvegicus GN=Alb PE=1 SV=2	113	511	170	572	523	616	595	553	500	791	854	697	710	654	545	1103	1203	564	2.5233e+08	8.32407e+08	1.68886e+08	1.08704e+09	8.44737e+08	1.17677e+09	1.27859e+09	1.11904e+09	9.8311e+08	1.66224e+09	1.62906e+09	1.13419e+09	9.71119e+08	4.36673e+09	1.07423e+09	6.39156e+09	1.70325e+10	1.42453e+09
P02761	20	17	2088.64	0.462793	2.26227	Young	Old	Major urinary protein OS=Rattus norvegicus PE=1 SV=1	109	199	81	232	200	124	25	57	16	133	136	172	159	45	104	11	26	80	4.70793e+08	1.84411e+09	2.46533e+08	2.71965e+09	1.88332e+09	8.62919e+08	7.42092e+07	1.11852e+08	7.66316e+07	5.31131e+08	4.3546e+08	7.45055e+08	5.17159e+08	5.3742e+08	4.14905e+08	1.5355e+08	1.92711e+08	5.70856e+08
P81828	2	2	336.04	0.0314091	3.27536	Young	Old	Urinary protein 2 OS=Rattus norvegicus PE=1 SV=1	60	114	67	94	117	115	120	104	123	65	67	93	92	66	100	90	49	44	2.76785e+08	1.57217e+09	1.76979e+08	7.88733e+08	1.17809e+09	1.9852e+09	1.63929e+09	1.66748e+09	1.79308e+09	1.45233e+08	1.20512e+08	4.85241e+08	2.56112e+08	9.25692e+08	5.84128e+08	3.57472e+08	2.17675e+08	2.54846e+08
P07522	43	43	4154.97	0.0098516	2.20896	Young	Old	Pro-epidermal growth factor OS=Rattus norvegicus GN=Egf PE=1 SV=2	314	105	280	184	114	207	282	386	357	147	165	128	139	97	140	82	26	117	3.35654e+08	1.39974e+08	2.38181e+08	2.70164e+08	1.54786e+08	1.91361e+08	1.98236e+08	3.50028e+08	2.87725e+08	1.07152e+08	9.78602e+07	1.28766e+08	1.00341e+08	1.53418e+08	1.40043e+08	7.13557e+07	5.97638e+07	1.04025e+08
P02782	8	8	1140.27	0.777809	1.21093	Old	Young	Prostatic steroid-binding protein C1 OS=Rattus norvegicus GN=Psbpc1 PE=1 SV=1	137	82	170	45	78	57	151	84	68	111	113	83	83	66	75	16	124	29	4.86621e+08	1.93617e+08	2.75425e+08	6.46169e+07	1.92441e+08	8.82684e+07	5.91739e+08	2.30928e+08	1.71479e+08	2.17658e+08	1.99149e+08	1.20687e+08	9.52741e+07	5.38588e+08	1.26938e+08	4.22235e+07	1.36069e+09	5.70854e+07
P27590	27	27	2218.82	0.999783	1.0015	Old	Young	Uromodulin OS=Rattus norvegicus GN=Umod PE=2 SV=1	179	64	148	217	65	130	124	145	189	132	123	124	143	117	196	155	10	132	1.70934e+08	6.63665e+07	1.02449e+08	2.86107e+08	6.18395e+07	1.15332e+08	1.09927e+08	1.23924e+08	1.74691e+08	1.06379e+08	1.03375e+08	1.25982e+08	1.13225e+08	2.50072e+08	1.83665e+08	1.73656e+08	6.49171e+07	1.37008e+08
P22282	17	15	1919.32	0.149638	2.26716	Young	Old	Cystatin-related protein 1 OS=Rattus norvegicus GN=Andpro PE=1 SV=1	223	56	231	40	63	31	110	45	32	42	50	26	31	32	28	1	82	7	9.21586e+08	1.92344e+08	4.80622e+08	4.54432e+07	2.09331e+08	5.35605e+07	2.72903e+08	1.15267e+08	9.44376e+07	1.1149e+08	9.81034e+07	4.54861e+07	3.0086e+07	1.74612e+08	3.17239e+07	4.75032e+07	4.45175e+08	3.7948e+07
P12346	38	37	4031.27	0.00120206	6.08758	Old	Young	Serotransferrin OS=Rattus norvegicus GN=Tf PE=1 SV=3	20	55	16	60	53	110	94	52	82	132	107	81	75	89	108	183	226	119	2.13796e+07	3.28337e+07	1.55698e+07	4.18145e+07	3.08523e+07	6.22744e+07	6.92623e+07	4.30242e+07	5.53408e+07	1.06394e+08	9.17281e+07	5.58462e+07	4.02176e+07	2.31851e+08	7.60041e+07	4.28912e+08	1.11392e+09	8.66701e+07
P20767	9	9	1144.61	0.0249532	5.17947	Old	Young	Ig lambda-2 chain C region OS=Rattus norvegicus PE=2 SV=1	52	53	68	65	57	46	69	76	78	97	95	126	142	71	123	80	66	132	4.97841e+07	4.50503e+07	3.57986e+07	5.37105e+07	3.83025e+07	5.22686e+07	6.42723e+07	7.83636e+07	1.05999e+08	1.36189e+08	1.00112e+08	2.85372e+08	2.42708e+08	6.87196e+08	3.20858e+08	3.79105e+08	2.14031e+08	3.52767e+08
P81827	2	2	188	0.00703814	7.17507	Young	Old	Urinary protein 1 OS=Rattus norvegicus PE=1 SV=1	29	46	38	27	46	45	46	48	46	6	5	26	30	15	27	2	1	10	8.29593e+07	2.80765e+08	6.17152e+07	1.47014e+08	1.96972e+08	6.39749e+08	5.91418e+08	5.99259e+08	5.71353e+08	2.50487e+07	2.01792e+07	9.30293e+07	8.01014e+07	5.26253e+07	6.39293e+07	1.76004e+07	2.41988e+06	3.65665e+07
P01836	14	8	1944.66	0.0259313	15.3085	Young	Old	Ig kappa chain C region, A allele OS=Rattus norvegicus PE=1 SV=1	0	43	0	96	45	71	0	0	0	0	0	0	0	0	2	1	0	0	1.64503e+06	7.60999e+07	1.37377e+06	1.07808e+08	5.04679e+07	5.77605e+07	2.11679e+06	1.41892e+06	928019	1.10544e+06	1.41759e+06	1.32561e+06	1.55831e+06	1.72599e+06	1.26586e+06	2.94351e+06	5.77711e+06	1.22216e+06
P08723	10	10	1582.56	0.390754	4.12763	Young	Old	Prostatic spermine-binding protein OS=Rattus norvegicus GN=Sbp PE=1 SV=1	288	40	298	9	44	7	49	18	17	30	25	19	20	20	108	9	42	17	1.32818e+09	3.52135e+07	7.15428e+08	2.04801e+07	3.84007e+07	2.82639e+07	7.86317e+07	2.79934e+07	2.29678e+07	2.62482e+07	2.53182e+07	1.37801e+07	1.47294e+07	1.21112e+08	1.04246e+08	2.66953e+07	1.34008e+08	4.08781e+07
Q64240	13	13	1194.5	0.51239	1.95289	Young	Old	Protein AMBP OS=Rattus norvegicus GN=Ambp PE=1 SV=1	9	33	12	57	35	48	56	90	105	48	45	50	42	41	21	37	13	58	3.01694e+07	5.11878e+07	1.80265e+07	9.97643e+07	4.92175e+07	7.48288e+07	1.23015e+08	2.06844e+08	2.55756e+08	4.10156e+07	4.17891e+07	3.82922e+07	3.72504e+07	1.3596e+08	1.85142e+07	3.96282e+07	2.56509e+07	7.33494e+07
P02780	5	5	454.74	0.0366423	3.24937	Young	Old	Secretoglobin family 2A member 2 OS=Rattus norvegicus GN=Scgb2a2 PE=1 SV=1	38	32	54	16	26	20	42	38	32	26	34	16	23	0	29	2	0	18	3.42406e+08	1.19458e+08	2.46816e+08	5.88203e+07	9.67655e+07	6.62979e+07	3.70656e+08	1.17068e+08	1.10291e+08	1.11958e+08	8.89981e+07	7.9237e+07	6.05157e+07	241198	7.51512e+07	2.31362e+06	238216	4.82125e+07
P98158	56	56	4867.56	0.237649	1.49213	Young	Old	Low-density lipoprotein receptor-related protein 2 OS=Rattus norvegicus GN=Lrp2 PE=1 SV=1	65	30	96	53	31	63	52	44	79	39	41	38	36	19	43	21	1	37	3.99038e+07	1.17777e+07	2.99223e+07	1.45155e+07	1.11687e+07	2.24919e+07	1.92742e+07	2.16817e+07	3.23791e+07	1.04421e+07	9.87538e+06	1.0648e+07	7.99772e+06	2.21304e+07	1.61226e+07	1.27056e+07	1.80108e+07	2.08639e+07
P20059	18	18	1600.73	0.123948	2.11157	Old	Young	Hemopexin OS=Rattus norvegicus GN=Hpx PE=1 SV=3	31	30	36	87	31	83	89	39	92	53	61	54	63	53	71	78	122	70	3.4987e+07	3.3581e+07	2.16675e+07	5.78202e+07	3.9085e+07	5.48136e+07	3.47246e+07	3.36171e+07	4.61287e+07	4.40798e+07	4.59259e+07	3.51487e+07	3.38681e+07	1.53995e+08	4.14671e+07	9.27352e+07	2.4132e+08	6.66099e+07
P07632	12	12	1383.15	0.0715385	1.52794	Old	Young	Superoxide dismutase [Cu-Zn] OS=Rattus norvegicus GN=Sod1 PE=1 SV=2	13	30	17	34	30	40	42	28	55	40	46	44	49	17	45	18	16	45	1.06248e+07	2.33794e+07	7.16913e+06	3.4974e+07	2.43895e+07	2.93144e+07	2.78981e+07	2.75834e+07	3.02985e+07	3.44239e+07	3.45051e+07	4.14236e+07	3.47986e+07	3.74498e+07	5.28467e+07	9.20246e+06	3.72124e+07	3.68701e+07
P00689	12	12	1081.59	0.400442	1.19539	Young	Old	Pancreatic alpha-amylase OS=Rattus norvegicus GN=Amy2 PE=2 SV=2	16	29	22	26	24	27	25	32	27	21	25	39	38	3	18	2	0	17	1.09732e+07	2.75775e+07	9.36424e+06	3.87667e+07	2.21958e+07	2.89848e+07	1.46983e+07	1.93888e+07	2.4434e+07	2.64473e+07	2.77676e+07	3.84832e+07	3.47809e+07	1.71559e+06	1.83996e+07	1.35745e+06	168984	1.44693e+07
Q01177	35	35	3141.39	0.332379	1.52751	Young	Old	Plasminogen OS=Rattus norvegicus GN=Plg PE=2 SV=2	15	29	18	47	21	66	62	64	100	38	39	34	29	44	34	54	45	48	1.3327e+07	2.1849e+07	1.08644e+07	2.80673e+07	1.93607e+07	3.55834e+07	7.36065e+07	8.702e+07	1.51218e+08	1.61889e+07	1.48163e+07	1.73086e+07	1.27992e+07	7.46909e+07	1.85919e+07	5.53177e+07	5.87158e+07	3.1973e+07
P17475	20	20	1849.95	0.00827721	4.24795	Old	Young	Alpha-1-antiproteinase OS=Rattus norvegicus GN=Serpina1 PE=1 SV=2	12	27	19	23	19	15	11	8	11	45	66	52	67	48	25	64	87	23	1.63949e+07	1.39378e+07	1.09475e+07	1.69443e+07	1.44965e+07	1.61488e+07	1.13435e+07	7.67204e+06	9.44937e+06	1.62285e+07	1.5813e+07	1.80931e+07	2.16117e+07	1.09754e+08	1.95497e+07	8.67587e+07	2.33593e+08	1.99425e+07
P00758	7	7	855.27	0.819029	1.04937	Old	Young	Kallikrein-1 OS=Rattus norvegicus GN=Ngfg PE=2 SV=2	22	27	19	39	25	46	47	42	74	36	36	36	30	49	32	33	9	45	2.02997e+07	3.1521e+07	1.23513e+07	7.10707e+07	3.39812e+07	5.91901e+07	8.11681e+07	1.16287e+08	1.01173e+08	4.24259e+07	3.97836e+07	5.12927e+07	3.80599e+07	1.50431e+08	6.65556e+07	6.71147e+07	1.91969e+07	7.87862e+07
P07647	11	10	1403.4	0.249416	1.17116	Young	Old	Submandibular glandular kallikrein-9 OS=Rattus norvegicus GN=Klk9 PE=1 SV=1	62	26	79	28	49	29	108	35	29	34	39	30	29	35	20	7	47	8	9.76097e+07	2.43898e+07	6.33624e+07	2.10874e+07	4.5647e+07	2.19013e+07	9.50699e+07	4.13717e+07	1.94112e+07	3.25534e+07	2.88723e+07	1.64528e+07	1.73565e+07	9.98325e+07	2.01609e+07	1.56859e+07	1.43979e+08	1.3954e+07
Q64230	15	15	1478.25	0.90208	1.00519	Old	Young	Meprin A subunit alpha OS=Rattus norvegicus GN=Mep1a PE=1 SV=2	55	23	49	45	23	52	17	20	18	31	38	35	42	27	34	26	6	30	4.13949e+07	1.18898e+07	2.3986e+07	2.55034e+07	1.19651e+07	3.9792e+07	3.08499e+07	2.59573e+07	2.03565e+07	2.79729e+07	2.21621e+07	2.4049e+07	2.05304e+07	4.79848e+07	2.86339e+07	4.09545e+07	1.86162e+07	2.53548e+07
Q9R0T4	9	9	758.04	0.84206	1.14447	Young	Old	Cadherin-1 OS=Rattus norvegicus GN=Cdh1 PE=1 SV=1	39	23	32	31	17	27	45	98	62	31	21	24	27	33	45	38	7	12	2.60485e+07	9.75217e+06	1.97609e+07	1.63779e+07	5.95408e+06	1.2887e+07	3.06029e+07	4.80943e+07	3.38466e+07	1.88612e+07	1.99694e+07	1.38736e+07	1.65335e+07	3.44276e+07	2.28618e+07	2.2012e+07	2.01504e+07	1.10156e+07
P42854	3	3	455.1	0.000987281	6.37751	Young	Old	Regenerating islet-derived protein 3-gamma OS=Rattus norvegicus GN=Reg3g PE=1 SV=1	24	22	16	32	27	37	36	17	68	11	15	13	12	0	3	0	0	5	1.03273e+07	2.36304e+07	1.41495e+07	2.55353e+07	2.92987e+07	6.17353e+07	9.26513e+07	1.17133e+07	1.46367e+08	1.06464e+07	1.26522e+07	6.81133e+06	8.38745e+06	2.75975e+06	3.11738e+06	3.7726e+06	2.20561e+06	1.02907e+07
Q63041	36	35	3243.69	0.592313	1.18977	Young	Old	Alpha-1-macroglobulin OS=Rattus norvegicus GN=A1m PE=1 SV=1	133	21	126	64	30	72	72	61	59	48	49	49	41	44	59	49	3	52	8.59521e+07	1.32371e+07	6.05586e+07	3.74922e+07	1.60915e+07	3.19318e+07	4.0328e+07	4.93924e+07	3.41971e+07	2.2246e+07	2.40895e+07	2.04665e+07	2.18754e+07	4.86115e+07	3.57017e+07	5.66052e+07	5.41165e+07	3.12834e+07
Q68FP1	10	10	1061.13	0.505616	1.66156	Young	Old	Gelsolin OS=Rattus norvegicus GN=Gsn PE=1 SV=1	55	21	34	42	23	22	10	7	27	15	21	19	18	21	10	12	4	26	3.84682e+07	1.11958e+07	2.06178e+07	2.13913e+07	1.06158e+07	1.8645e+07	6.01529e+06	2.33781e+06	1.6835e+07	7.87086e+06	7.43134e+06	7.13527e+06	6.06399e+06	2.39815e+07	6.09939e+06	8.0631e+06	3.14939e+06	1.47439e+07
P05544	23	17	2274.04	0.902853	1.05686	Young	Old	Serine protease inhibitor A3L OS=Rattus norvegicus GN=Serpina3l PE=1 SV=3	49	20	41	39	22	90	80	44	76	55	54	59	67	34	69	49	18	43	3.99216e+07	1.69266e+07	2.74695e+07	4.87808e+07	1.22301e+07	4.89405e+07	4.25166e+07	3.28454e+07	4.59137e+07	2.63794e+07	2.41897e+07	4.34687e+07	4.1129e+07	2.71637e+07	4.15072e+07	4.40188e+07	1.48352e+07	2.90738e+07
Q6IFW6	9	7	639.49	0.191059	1.52572	Young	Old	Keratin, type I cytoskeletal 10 OS=Rattus norvegicus GN=Krt10 PE=2 SV=1	15	20	9	12	15	24	11	5	18	19	12	19	10	2	14	4	0	12	7.6683e+06	7.532e+06	4.12418e+06	4.6727e+06	6.68103e+06	6.39979e+06	2.54846e+06	1.73218e+06	4.32902e+06	3.8051e+06	3.3086e+06	4.4932e+06	3.03931e+06	1.55362e+06	5.85528e+06	1.61351e+06	1.50132e+06	5.3103e+06
Q64319	17	17	1193.31	0.00508501	3.83568	Young	Old	Neutral and basic amino acid transport protein rBAT OS=Rattus norvegicus GN=Slc3a1 PE=1 SV=1	40	19	45	37	20	36	18	13	18	0	1	3	0	5	4	6	0	7	2.02005e+07	1.32191e+07	1.41554e+07	1.58053e+07	9.29044e+06	1.8297e+07	3.84171e+06	5.53207e+06	5.07204e+06	1.44795e+06	1.78523e+06	1.65627e+06	1.83342e+06	6.01527e+06	3.17976e+06	5.333e+06	1.89165e+06	3.55345e+06
P07314	9	9	666.99	0.00671441	2.49121	Young	Old	Gamma-glutamyltranspeptidase 1 OS=Rattus norvegicus GN=Ggt1 PE=1 SV=4	34	19	34	27	18	26	12	13	18	9	6	6	7	10	18	13	3	20	1.8732e+07	5.63125e+06	1.19067e+07	1.29884e+07	4.93213e+06	1.27399e+07	4.28233e+06	5.608e+06	4.15588e+06	1.60156e+06	1.57057e+06	1.2312e+06	1.22179e+06	6.36715e+06	4.92148e+06	9.09813e+06	3.56052e+06	3.5979e+06
P15684	14	14	1307.19	0.0014623	2.46945	Young	Old	Aminopeptidase N OS=Rattus norvegicus GN=Anpep PE=1 SV=2	9	19	11	24	17	16	6	14	7	7	5	5	5	3	8	7	1	7	1.37527e+07	8.7271e+06	8.72366e+06	1.38281e+07	9.20933e+06	1.63008e+07	4.38214e+06	6.58265e+06	6.70965e+06	4.71936e+06	4.31243e+06	2.43678e+06	2.38945e+06	6.15762e+06	4.81369e+06	5.95951e+06	1.22034e+06	5.88605e+06
Q99041	23	23	2156.62	0.4045	1.8683	Young	Old	Protein-glutamine gamma-glutamyltransferase 4 OS=Rattus norvegicus GN=Tgm4 PE=1 SV=2	53	17	78	6	17	12	4	3	13	36	39	16	14	4	11	19	0	0	4.39608e+07	7.00007e+06	2.67806e+07	2.18596e+06	6.20114e+06	3.49764e+06	3.08585e+06	2.01257e+06	4.64204e+06	1.0238e+07	9.106e+06	3.7958e+06	2.63157e+06	2.4362e+06	4.27268e+06	1.65181e+07	2.61817e+06	2.0725e+06
P06760	13	13	845.58	0.0136804	2.15921	Old	Young	Beta-glucuronidase OS=Rattus norvegicus GN=Gusb PE=2 SV=1	0	17	1	15	17	5	1	22	0	25	34	27	28	12	15	5	7	4	2.03918e+06	5.29195e+06	2.18599e+06	1.07132e+07	6.06176e+06	4.81244e+06	1.41983e+06	1.34591e+07	2.72369e+06	1.49726e+07	1.45382e+07	1.36816e+07	1.34033e+07	1.70103e+07	1.30878e+07	7.42212e+06	2.06651e+07	3.37072e+06
P06866	14	14	1037.35	0.37999	1.34721	Old	Young	Haptoglobin OS=Rattus norvegicus GN=Hp PE=1 SV=3	1	17	1	38	21	13	12	11	11	33	37	10	13	12	11	12	7	8	1.16644e+06	7.62691e+06	919623	1.13218e+07	8.57767e+06	5.41302e+06	3.86654e+06	3.76829e+06	3.5491e+06	1.6743e+07	1.49015e+07	3.46726e+06	2.23397e+06	6.70077e+06	4.45185e+06	7.51408e+06	3.32144e+06	2.31112e+06
P36953	16	16	1448.05	0.778755	1.21625	Old	Young	Afamin OS=Rattus norvegicus GN=Afm PE=2 SV=1	6	16	11	32	11	20	18	17	11	21	20	17	18	24	10	24	16	11	6.68406e+06	5.7958e+06	3.06635e+06	9.53863e+06	4.49885e+06	5.68095e+06	4.30998e+06	5.73638e+06	4.62168e+06	4.89318e+06	5.50491e+06	4.59579e+06	3.90617e+06	1.52975e+07	2.28057e+06	6.48031e+06	1.41159e+07	3.74145e+06
P24090	9	9	758.42	0.0749035	2.66188	Young	Old	Alpha-2-HS-glycoprotein OS=Rattus norvegicus GN=Ahsg PE=1 SV=2	3	16	5	22	12	21	35	27	44	6	5	3	8	0	6	5	3	8	7.95546e+06	1.43428e+07	1.05213e+07	2.83895e+07	1.13454e+07	2.11092e+07	2.45392e+07	3.33276e+07	4.34182e+07	4.47509e+06	5.7747e+06	7.00852e+06	6.29236e+06	5.01258e+06	3.91056e+06	6.2783e+06	1.35748e+07	5.38165e+06
P22283	10	8	916.13	0.105451	1.90217	Young	Old	Cystatin-related protein 2 OS=Rattus norvegicus GN=Crp2 PE=2 SV=1	54	15	59	7	12	7	58	21	18	16	15	16	10	41	14	2	42	8	2.3791e+08	3.46567e+07	1.07168e+08	1.18153e+07	3.61513e+07	2.41564e+07	1.13096e+08	4.19659e+07	2.71207e+07	2.22901e+07	1.82135e+07	2.60734e+07	1.94653e+07	1.18181e+08	2.50178e+07	7.94857e+06	1.55718e+08	2.32833e+07
P21704	9	9	661.5	0.985629	1.02963	Old	Young	Deoxyribonuclease-1 OS=Rattus norvegicus GN=Dnase1 PE=2 SV=1	54	15	43	39	18	55	25	51	44	43	41	52	55	53	59	31	4	60	6.03671e+07	1.10757e+07	3.81754e+07	3.35301e+07	1.18919e+07	3.00309e+07	2.56214e+07	5.94701e+07	4.51434e+07	2.87929e+07	2.64885e+07	3.13134e+07	2.53846e+07	7.80909e+07	3.90418e+07	3.5446e+07	1.91721e+07	4.48963e+07
Q5XI43	17	16	1214.67	0.0051801	1.94045	Young	Old	Matrix-remodeling-associated protein 8 OS=Rattus norvegicus GN=Mxra8 PE=2 SV=1	18	15	23	18	10	24	36	37	41	19	18	16	12	6	16	6	0	28	1.85874e+07	8.79019e+06	1.04293e+07	1.28762e+07	8.21377e+06	1.29339e+07	2.00287e+07	2.18083e+07	2.12433e+07	7.51884e+06	6.28758e+06	9.01307e+06	5.49239e+06	1.21053e+07	6.57644e+06	7.1609e+06	1.49716e+06	1.63608e+07
P00787	11	10	1487.42	0.588486	1.72027	Old	Young	Cathepsin B OS=Rattus norvegicus GN=Ctsb PE=1 SV=2	7	15	6	33	17	20	9	9	8	9	12	6	10	5	9	2	2	13	874222	2.74602e+06	853176	6.60239e+06	2.50706e+06	2.53473e+06	1.43076e+06	2.5526e+06	2.10376e+06	1.95621e+06	2.04798e+06	1.34115e+06	1.45436e+06	3.40344e+06	2.00286e+06	2.62813e+06	5.80993e+06	1.8213e+06
P14841	3	3	382.36	0.666226	1.19823	Young	Old	Cystatin-C OS=Rattus norvegicus GN=Cst3 PE=1 SV=2	4	13	4	20	11	9	11	21	19	15	14	13	19	2	12	9	1	13	7.51748e+06	1.39029e+07	4.63205e+06	3.23471e+07	9.18156e+06	1.93768e+07	1.93408e+07	2.37142e+07	3.83754e+07	1.59006e+07	1.3578e+07	1.91991e+07	1.23829e+07	1.50257e+07	1.62242e+07	1.88396e+07	1.72615e+06	2.79841e+07
P15083	22	22	2333.45	0.268635	1.06726	Old	Young	Polymeric immunoglobulin receptor OS=Rattus norvegicus GN=Pigr PE=2 SV=1	77	12	51	26	7	23	16	21	26	41	33	26	14	30	54	22	3	30	6.99587e+07	1.22462e+07	3.81208e+07	1.17492e+07	9.40262e+06	8.34421e+06	1.38333e+07	1.83796e+07	1.71044e+07	2.40981e+07	2.17946e+07	1.69665e+07	1.28959e+07	3.64465e+07	3.5426e+07	1.44468e+07	1.75214e+07	1.60716e+07
P18292	7	7	654.71	0.0011682	3.76	Young	Old	Prothrombin OS=Rattus norvegicus GN=F2 PE=1 SV=1	19	12	22	23	5	14	18	27	28	7	8	5	5	9	9	7	0	15	2.12716e+07	1.31396e+07	1.30661e+07	1.2441e+07	5.50451e+06	2.18123e+07	3.29834e+07	3.8826e+07	5.13209e+07	4.12717e+06	4.47912e+06	1.49904e+06	1.97227e+06	2.45558e+07	6.42488e+06	1.33336e+07	4.20404e+06	1.06956e+07
Q6IRK9	6	6	493.97	0.760994	1.08583	Old	Young	Carboxypeptidase Q OS=Rattus norvegicus GN=Cpq PE=1 SV=1	12	12	14	10	10	11	5	7	12	14	13	14	13	9	14	7	5	10	3.97388e+06	1.67962e+06	3.34209e+06	4.46584e+06	1.76753e+06	4.12596e+06	1.42925e+06	3.1858e+06	3.87971e+06	3.63676e+06	3.68312e+06	3.11468e+06	2.09542e+06	5.94622e+06	4.24489e+06	3.26801e+06	1.4054e+06	2.77892e+06
Q8CHN3	9	9	1014.88	0.20077	1.26433	Young	Old	WAP four-disulfide core domain protein 2 OS=Rattus norvegicus GN=Wfdc2 PE=2 SV=1	2	12	7	12	13	13	8	6	12	6	7	8	9	1	11	3	0	6	3.13568e+06	6.84349e+06	1.70773e+06	4.54733e+06	5.47043e+06	9.71186e+06	6.16732e+06	4.42258e+06	8.10264e+06	2.70703e+06	1.86164e+06	5.16246e+06	2.41452e+06	1.24945e+07	4.76419e+06	1.64518e+06	1.13636e+06	4.02803e+06
P14740	12	12	800.41	0.03279	1.55688	Young	Old	Dipeptidyl peptidase 4 OS=Rattus norvegicus GN=Dpp4 PE=1 SV=2	22	10	26	15	9	10	15	14	15	8	11	7	6	7	12	13	5	13	1.2721e+07	5.4812e+06	7.43848e+06	7.75975e+06	6.21495e+06	6.48724e+06	5.48691e+06	7.96338e+06	6.04732e+06	2.54336e+06	2.5172e+06	3.61124e+06	3.15345e+06	8.57567e+06	7.50018e+06	3.96827e+06	3.06686e+06	5.07061e+06
P00763	1	1	103.77	0.572948	1.55837	Young	Old	Anionic trypsin-2 OS=Rattus norvegicus GN=Prss2 PE=1 SV=2	19	10	21	24	10	28	12	11	20	12	6	8	10	10	13	10	4	21	6.29471e+06	8.55817e+06	4.53509e+06	8.56449e+06	8.06419e+06	1.10336e+07	6.4196e+06	6.91602e+06	6.92822e+06	2.9837e+06	3.26596e+06	2.35218e+06	3.01218e+06	9.94367e+06	4.87676e+06	4.31318e+06	4.74842e+06	7.65981e+06
P84855	4	1	428.48	0.063737	179.719	Young	Old	Major urinary protein (Fragments) OS=Rattus rattus PE=1 SV=2	0	10	1	13	9	0	0	0	0	0	0	1	2	0	0	0	1	2	4542.37	6.59362e+06	30898.7	1.43615e+07	4.92755e+06	15796	536.165	200.715	11716.8	8285.56	15803.6	18913.3	47110	0	22692.3	0	4434.69	27177.1
P36373	10	9	1052.92	0.742466	1.22532	Old	Young	Glandular kallikrein-7, submandibular/renal OS=Rattus norvegicus GN=Klk7 PE=1 SV=1	43	9	25	27	17	36	40	44	47	43	30	46	27	46	57	65	15	47	5.13462e+07	1.45298e+07	2.05291e+07	3.28404e+07	1.53719e+07	4.37098e+07	4.42305e+07	1.01353e+08	6.21517e+07	3.65018e+07	2.3159e+07	3.78486e+07	2.53693e+07	1.31696e+08	6.88241e+07	8.10568e+07	3.44196e+07	4.67507e+07
Q9EPB1	5	5	386.2	0.0387344	2.3827	Young	Old	Dipeptidyl peptidase 2 OS=Rattus norvegicus GN=Dpp7 PE=1 SV=1	21	9	15	13	10	12	27	30	24	11	9	8	9	7	17	6	0	17	1.39558e+07	2.64458e+06	7.81322e+06	3.83964e+06	2.73638e+06	5.17692e+06	1.77726e+07	1.60579e+07	1.61692e+07	3.86657e+06	3.33879e+06	4.83399e+06	3.10978e+06	2.76438e+06	6.32446e+06	4.8466e+06	791448	5.6116e+06
P05545	13	7	1540.66	0.762248	1.19686	Young	Old	Serine protease inhibitor A3K OS=Rattus norvegicus GN=Serpina3k PE=1 SV=3	4	8	15	17	6	17	15	13	17	11	14	18	21	2	10	8	7	14	2.97619e+06	9.22387e+06	1.92283e+07	1.72799e+07	7.65762e+06	1.42573e+07	7.64127e+06	1.01213e+07	1.64057e+07	1.1927e+07	1.27647e+07	2.38798e+07	1.94376e+07	2.52308e+06	1.15538e+07	7.96445e+06	7.9613e+06	1.70751e+07
P04937	11	11	1013.72	0.000151599	4.20876	Young	Old	Fibronectin OS=Rattus norvegicus GN=Fn1 PE=1 SV=2	10	8	8	14	7	14	31	21	31	5	3	6	1	2	5	3	0	1	4.46911e+06	2.21756e+06	2.3686e+06	3.90391e+06	2.70708e+06	4.30913e+06	1.24424e+07	7.10192e+06	1.50848e+07	1.21962e+06	902783	1.16267e+06	686744	3.31708e+06	2.0154e+06	1.69793e+06	843415	1.27273e+06
Q6IMF3	9	6	752.03	0.0346659	1.5316	Young	Old	Keratin, type II cytoskeletal 1 OS=Rattus norvegicus GN=Krt1 PE=2 SV=1	6	8	6	6	7	12	5	8	9	12	13	11	6	6	11	7	1	14	6.8298e+06	1.28394e+07	7.79619e+06	5.72292e+06	1.38981e+07	1.365e+07	5.24799e+06	5.08095e+06	7.31745e+06	4.56982e+06	3.68006e+06	4.73316e+06	5.04242e+06	5.84113e+06	5.91465e+06	4.57684e+06	4.7467e+06	5.3874e+06
Q4FZU2	3	1	209.88	0.442309	1.38258	Young	Old	Keratin, type II cytoskeletal 6A OS=Rattus norvegicus GN=Krt6a PE=1 SV=1	2	8	5	1	3	6	5	2	7	0	1	1	1	1	2	1	0	2	2.06895e+06	1.52569e+06	1.37861e+06	808799	213776	2.0544e+06	1.15837e+06	745252	1.76075e+06	707473	643100	924207	530446	1.37193e+06	1.05323e+06	1.07528e+06	106231	2.08433e+06
P13635	18	17	1498.27	2.07613e-05	4.53405	Old	Young	Ceruloplasmin OS=Rattus norvegicus GN=Cp PE=1 SV=3	1	8	3	12	12	9	4	3	8	33	31	25	30	31	14	27	27	23	7.37751e+06	4.75566e+06	6.03493e+06	1.0511e+07	6.7509e+06	9.63425e+06	6.5247e+06	8.23694e+06	8.96009e+06	2.12931e+07	1.77287e+07	2.99902e+07	2.21849e+07	6.99396e+07	2.37823e+07	5.99405e+07	5.89164e+07	3.75285e+07
P07151	5	5	339.58	0.00473181	3.59754	Young	Old	Beta-2-microglobulin OS=Rattus norvegicus GN=B2m PE=1 SV=1	4	8	1	23	11	13	4	2	9	2	2	4	3	3	3	3	0	4	5.87432e+06	9.00148e+06	2.4427e+06	1.73707e+07	7.68641e+06	6.44744e+06	1.73253e+06	1.30451e+06	3.87121e+06	1.34387e+06	1.50913e+06	2.21863e+06	1.96659e+06	4.62543e+06	1.97074e+06	2.70031e+06	936315	2.54112e+06
P20760	21	15	2193.38	8.86207e-08	19.4458	Old	Young	Ig gamma-2A chain C region OS=Rattus norvegicus GN=Igg-2a PE=1 SV=1	13	7	13	15	4	6	3	1	6	126	128	147	132	147	140	209	198	107	9.02512e+06	2.1104e+07	1.05063e+07	9.59734e+06	1.13627e+07	7.31334e+06	6.86316e+06	6.37144e+06	7.8567e+06	9.29731e+07	9.29718e+07	1.16509e+08	9.51503e+07	4.5116e+08	1.19816e+08	4.51919e+08	6.76346e+08	1.12899e+08
P02764	6	6	453.24	0.0728599	1.67176	Old	Young	Alpha-1-acid glycoprotein OS=Rattus norvegicus GN=Orm1 PE=2 SV=1	0	7	1	10	7	0	1	1	2	8	16	6	12	6	4	4	3	2	17811.7	2.18338e+06	243698	3.1562e+06	1.91408e+06	65919.4	46181.5	35473	126461	803150	2.25982e+06	487434	1.61198e+06	5.34876e+06	396357	1.43588e+06	495286	86473.8
P32038	1	1	159.5	0.544722	1.37668	Old	Young	Complement factor D OS=Rattus norvegicus GN=Cfd PE=1 SV=2	1	7	1	10	6	12	19	11	19	18	16	11	9	11	11	32	7	13	2.10819e+07	2.39646e+06	1.31095e+07	5.94568e+06	2.63081e+06	3.60993e+06	6.84513e+06	5.82395e+06	9.99695e+06	4.99558e+06	6.46468e+06	3.94631e+06	4.49814e+06	6.07408e+06	5.07103e+06	1.72784e+07	2.84026e+07	3.81057e+06
Q04807	4	4	333.98	0.0723985	3.49626	Young	Old	Glycosylation-dependent cell adhesion molecule 1 OS=Rattus norvegicus GN=Glycam1 PE=2 SV=1	4	6	7	3	7	1	1	3	2	3	7	2	3	0	2	1	0	0	4.69909e+06	4.18741e+06	4.28735e+06	349752	3.71016e+06	431630	1.9782e+06	4.39658e+06	6.01364e+06	2.75586e+06	2.61867e+06	726756	533101	28805.3	904488	908425	8948.76	90147.5
P23785	6	6	572.07	0.0562871	2.42906	Young	Old	Granulins OS=Rattus norvegicus GN=Grn PE=1 SV=3	3	6	3	12	5	5	9	14	16	4	8	5	10	5	2	4	3	0	4.09378e+06	2.69589e+06	2.68586e+06	3.55045e+06	3.24814e+06	5.41887e+06	1.64864e+07	2.50223e+07	2.04191e+07	1.85526e+06	2.09534e+06	1.6129e+06	1.58079e+06	1.03449e+07	2.98075e+06	8.23362e+06	3.32787e+06	3.15637e+06
P02767	2	2	257.01	0.136299	1.49797	Young	Old	Transthyretin OS=Rattus norvegicus GN=Ttr PE=1 SV=1	0	6	0	6	4	7	5	3	5	3	4	2	1	1	1	0	5	5	1.25883e+06	1.83712e+06	968186	1.18197e+06	1.27362e+06	2.44254e+06	1.51961e+06	762661	1.94167e+06	708817	593551	507339	429720	376091	581288	420886	3.55252e+06	1.0589e+06
P02650	11	10	724.48	0.516839	1.22169	Young	Old	Apolipoprotein E OS=Rattus norvegicus GN=Apoe PE=1 SV=2	19	5	17	3	5	9	8	15	7	9	5	8	9	1	11	5	0	7	1.04162e+07	3.78285e+06	8.53795e+06	3.49197e+06	3.64475e+06	4.33334e+06	4.03722e+06	5.29171e+06	3.84278e+06	4.77017e+06	4.27741e+06	4.63687e+06	3.91416e+06	3.84483e+06	5.36977e+06	5.49652e+06	1.16876e+06	4.48235e+06
P14046	34	10	2639.2	0.0121238	2.29486	Old	Young	Alpha-1-inhibitor 3 OS=Rattus norvegicus GN=A1i3 PE=1 SV=1	10	5	10	14	8	21	6	10	7	18	14	21	21	14	29	31	12	16	6.93545e+06	3.81743e+06	5.12043e+06	4.62289e+06	4.27012e+06	1.28697e+07	3.18595e+06	4.36511e+06	2.97368e+06	7.03285e+06	5.81822e+06	8.97881e+06	6.74198e+06	1.80424e+07	1.59592e+07	1.96749e+07	1.86798e+07	9.01866e+06
P10959	7	7	520.63	0.0068272	3.16382	Old	Young	Carboxylesterase 1C OS=Rattus norvegicus GN=Ces1c PE=1 SV=3	9	5	6	8	5	8	8	6	7	17	17	22	21	12	9	15	23	11	2.13311e+06	5.375e+06	1.61663e+06	4.95369e+06	5.23669e+06	2.89314e+06	2.07861e+06	1.72491e+06	2.58515e+06	4.75281e+06	3.94392e+06	5.66303e+06	4.55961e+06	1.8565e+07	2.6471e+06	1.30109e+07	3.05933e+07	4.12532e+06
P15399	9	9	601.16	0.225073	3.05997	Young	Old	Probasin OS=Rattus norvegicus GN=Pbsn PE=1 SV=1	97	4	73	11	4	0	0	2	0	0	0	0	0	0	47	6	0	0	8.42085e+07	2.87925e+06	4.26645e+07	3.51319e+06	3.20845e+06	1.24469e+06	850717	1.18925e+06	1.23557e+06	650470	613838	995306	1.0931e+06	1.24803e+06	3.07216e+07	7.19866e+06	3.38513e+06	831208
P02781	4	4	265.52	0.807337	3.93684	Old	Young	Prostatic steroid-binding protein C2 OS=Rattus norvegicus GN=Psbpc2 PE=1 SV=1	11	4	18	1	4	2	11	5	2	7	10	5	6	9	2	0	8	2	4.55621e+06	3.02209e+06	3.1191e+06	1.34118e+06	3.469e+06	1.29103e+06	4.86208e+06	2.2446e+06	1.26054e+06	1.37243e+06	2.53858e+06	1.31228e+06	1.52876e+06	6.66019e+07	1.28197e+06	1.35755e+07	1.39827e+07	2.05828e+06
P26051	3	2	221.62	0.564433	1.33361	Young	Old	CD44 antigen OS=Rattus norvegicus GN=Cd44 PE=1 SV=2	5	4	9	8	1	6	9	10	11	6	7	6	11	10	6	12	8	7	2.55615e+06	674068	2.35243e+06	1.64535e+06	412194	1.18163e+06	1.19589e+07	9.7536e+06	5.8237e+06	2.1339e+06	2.63444e+06	1.88179e+06	2.15298e+06	9.12115e+06	1.75546e+06	3.53321e+06	1.58622e+06	2.1598e+06
P85971	6	6	453.22	0.594422	1.06569	Young	Old	6-phosphogluconolactonase OS=Rattus norvegicus GN=Pgls PE=1 SV=1	9	4	8	9	7	8	17	17	20	2	0	2	2	2	6	2	0	6	3.67115e+06	1.26419e+06	2.09381e+06	1.42603e+06	1.37082e+06	2.64294e+06	4.95626e+06	6.1202e+06	6.02493e+06	1.65615e+06	1.62579e+06	1.28397e+06	1.49972e+06	3.30303e+06	4.53363e+06	3.22852e+06	8.7201e+06	2.78725e+06
P23680	3	3	219.91	0.0111021	2.8981	Young	Old	Serum amyloid P-component OS=Rattus norvegicus GN=Apcs PE=2 SV=2	7	4	5	3	3	4	8	5	11	3	3	3	2	2	4	3	0	4	2.03071e+06	686599	1.68899e+06	954534	706342	1.78028e+06	3.04897e+06	1.86394e+06	5.31444e+06	578896	598410	601399	548644	736416	707967	915846	168597	1.48083e+06
P29598	6	6	592.64	0.397386	1.64324	Young	Old	Urokinase-type plasminogen activator OS=Rattus norvegicus GN=Plau PE=1 SV=1	2	4	3	7	3	3	6	7	5	4	6	5	10	0	7	2	0	5	4.89809e+06	618931	948724	2.37905e+06	548421	2.26702e+06	1.93302e+06	4.20424e+06	2.10189e+06	1.17068e+06	781909	1.47533e+06	828326	1.08698e+06	2.51217e+06	587064	160605	2.73526e+06
P07861	10	10	891.38	0.0919388	1.42392	Young	Old	Neprilysin OS=Rattus norvegicus GN=Mme PE=1 SV=2	23	3	15	4	2	7	12	7	6	7	6	3	5	6	3	4	1	4	9.11362e+06	2.29039e+06	6.66264e+06	3.05541e+06	2.28519e+06	2.97719e+06	2.91648e+06	2.75129e+06	2.15621e+06	1.8222e+06	2.07719e+06	1.4826e+06	1.54012e+06	8.24223e+06	1.97717e+06	2.56729e+06	5.68811e+06	1.20419e+06
Q6DGG1	5	5	491.3	0.462642	1.16157	Young	Old	Alpha/beta hydrolase domain-containing protein 14B OS=Rattus norvegicus GN=Abhd14b PE=2 SV=1	9	3	7	8	4	14	11	8	6	7	4	6	3	1	5	5	0	7	4.32587e+06	1.42431e+06	2.96269e+06	1.77672e+06	1.51461e+06	2.86998e+06	2.97631e+06	4.35957e+06	2.54977e+06	1.59909e+06	1.45545e+06	1.08805e+06	1.06101e+06	3.79827e+06	2.07027e+06	2.55243e+06	4.41049e+06	2.8089e+06
Q499T2	2	2	253.55	0.408589	1.15559	Old	Young	Gamma-interferon-inducible lysosomal thiol reductase OS=Rattus norvegicus GN=Ifi30 PE=2 SV=1	12	3	4	1	2	1	8	5	7	6	5	8	6	3	11	4	1	6	2.38e+06	620681	833067	176725	420496	1.08412e+06	3.43278e+06	5.09736e+06	2.4771e+06	1.06225e+06	777154	1.14245e+06	564147	4.16485e+06	1.50262e+06	3.05483e+06	5.27994e+06	1.19243e+06
P0CG51	2	2	110.93	0.0906273	2.58071	Young	Old	Polyubiquitin-B OS=Rattus norvegicus GN=Ubb PE=1 SV=1	4	3	2	4	3	4	3	0	3	0	2	3	2	1	2	0	0	2	2.08377e+06	859707	1.79707e+06	1.47636e+06	4.27612e+06	2.01623e+06	1.17721e+06	46845	1.43634e+06	313634	342676	481560	598896	1.79067e+06	795410	207973	135362	823099
P31211	3	3	164.65	0.360795	1.56841	Old	Young	Corticosteroid-binding globulin OS=Rattus norvegicus GN=Serpina6 PE=1 SV=2	1	3	2	2	4	3	7	4	6	3	4	4	4	0	2	5	2	3	2.25931e+06	396134	959293	1.03264e+06	498727	911899	2.02558e+06	1.87434e+06	1.85148e+06	1.28702e+06	936249	1.34909e+06	951211	5.91656e+06	1.37981e+06	2.8718e+06	2.79544e+06	1.04923e+06
P04764	5	5	420.58	0.0167835	4.67777	Old	Young	Alpha-enolase OS=Rattus norvegicus GN=Eno1 PE=1 SV=4	0	3	1	3	1	3	1	0	3	3	1	0	0	0	9	0	0	0	398514	261601	254065	348336	212306	714164	534652	82266.6	397304	1.43015e+06	1.06075e+06	1.19783e+06	791921	1.06546e+06	4.69084e+06	2.60662e+06	31223.1	1.90983e+06
P13852	2	2	206.79	0.0513397	2.0813	Young	Old	Major prion protein OS=Rattus norvegicus GN=Prnp PE=1 SV=2	1	3	1	1	2	0	0	0	3	2	2	2	1	0	0	0	0	0	799665	343431	154928	391955	275008	488596	573182	589724	1.05344e+06	260988	202740	401487	232032	3582.1	440713	282414	93361.5	527045
P63102	2	1	153.46	0.262207	1.37303	Old	Young	14-3-3 protein zeta/delta OS=Rattus norvegicus GN=Ywhaz PE=1 SV=1	2	3	1	1	2	1	1	1	1	0	0	0	0	0	1	0	0	0	1.30541e+06	900064	2.09169e+06	520729	738737	988871	2.1353e+06	1.12489e+06	1.63317e+06	2.63459e+06	2.73634e+06	2.92241e+06	2.81434e+06	208.262	1.53691e+06	74648.5	16.6709	2.94952e+06
P20761	8	8	840.09	0.00404665	14.9266	Old	Young	Ig gamma-2B chain C region OS=Rattus norvegicus GN=Igh-1a PE=1 SV=1	0	3	0	6	0	3	3	3	1	14	9	6	3	3	10	24	49	10	1.48759e+06	2.41157e+06	1.00423e+06	2.78116e+06	2.53152e+06	2.55899e+06	2.46101e+06	3.62224e+06	1.32193e+06	7.29091e+06	6.60228e+06	3.02081e+06	2.31003e+06	1.35779e+07	9.3969e+06	3.64925e+07	2.45244e+08	7.16702e+06
O35568	8	8	697.22	0.0611535	2.97154	Young	Old	EGF-containing fibulin-like extracellular matrix protein 1 OS=Rattus norvegicus GN=Efemp1 PE=1 SV=1	2	3	0	23	6	11	12	15	13	5	3	3	2	3	4	5	0	13	1.52647e+06	2.03681e+06	880887	4.32425e+06	2.24363e+06	3.77059e+06	9.83126e+06	1.00261e+07	1.22846e+07	1.89687e+06	1.66433e+06	1.75667e+06	1.04053e+06	2.39889e+06	1.18268e+06	2.22412e+06	775498	2.85746e+06
Q6IG02	3	3	184.98	0.289466	8.31576	Young	Old	Keratin, type II cytoskeletal 2 epidermal OS=Rattus norvegicus GN=Krt2 PE=2 SV=1	1	3	0	2	2	0	0	0	0	0	0	0	0	0	0	1	0	0	227578	932361	62050.3	455308	636279	11169	0	22129.3	3068.16	7638.3	35804.1	11953.3	45107.4	0	19822.3	120035	0	36823.6
P01835	14	8	1906.92	0.0159684	3.73992	Old	Young	Ig kappa chain C region, B allele OS=Rattus norvegicus PE=1 SV=1	52	2	68	61	4	2	81	93	84	175	184	164	160	32	136	95	17	151	2.20063e+08	9.67051e+06	1.40249e+08	2.23744e+08	9.19277e+06	1.32828e+07	4.55209e+08	5.45556e+08	6.368e+08	1.04026e+09	8.97625e+08	1.38092e+09	9.18954e+08	9.09591e+07	1.42887e+09	1.49498e+09	6.60116e+07	1.08793e+09
P28826	10	10	908.6	0.212607	1.38894	Young	Old	Meprin A subunit beta OS=Rattus norvegicus GN=Mep1b PE=1 SV=3	23	2	19	15	2	17	9	9	13	6	5	3	1	3	12	5	0	7	9.96479e+06	3.45593e+06	6.29585e+06	5.50005e+06	2.51195e+06	6.17672e+06	2.64035e+06	3.5342e+06	3.55458e+06	1.72169e+06	1.52303e+06	1.68702e+06	1.52442e+06	5.23557e+06	3.38477e+06	4.77154e+06	1.03936e+06	2.98671e+06
P50123	7	7	441.97	0.0565684	3.52878	Young	Old	Glutamyl aminopeptidase OS=Rattus norvegicus GN=Enpep PE=1 SV=2	9	2	15	7	2	10	4	3	7	4	5	1	1	2	6	0	0	0	5.20777e+06	1.09156e+06	2.79637e+06	2.08643e+06	704581	1.37833e+06	1.58575e+06	1.19449e+06	1.5252e+06	653581	866473	675041	431996	468233	658874	170793	367039	603998
P01015	6	5	452.47	0.863555	1.70787	Old	Young	Angiotensinogen OS=Rattus norvegicus GN=Agt PE=1 SV=1	4	2	6	3	6	4	0	1	2	3	3	1	3	4	1	4	1	3	1.36085e+06	417511	781181	672037	717018	562173	63450	115560	105762	227583	121490	262133	163484	1.3421e+06	208919	3.1863e+06	2.42457e+06	338144
P09006	7	7	556.93	0.0062826	6.40675	Old	Young	Serine protease inhibitor A3N OS=Rattus norvegicus GN=Serpina3n PE=1 SV=3	5	2	3	4	2	6	5	4	4	11	10	5	5	20	7	5	29	15	2.04382e+06	1.33102e+06	1.16818e+06	2.11577e+06	1.65897e+06	2.58538e+06	1.51217e+06	2.74587e+06	1.561e+06	2.62844e+06	2.63279e+06	2.03514e+06	1.9971e+06	2.02012e+07	3.77368e+06	6.50198e+06	6.14004e+07	4.91892e+06
Q9JJ19	6	6	307.62	0.0311048	3.24152	Young	Old	Na(+)/H(+) exchange regulatory cofactor NHE-RF1 OS=Rattus norvegicus GN=Slc9a3r1 PE=1 SV=3	10	2	3	7	4	13	1	3	1	0	0	0	0	0	5	1	0	1	3.25617e+06	430527	1.87029e+06	1.88402e+06	458634	2.06062e+06	564264	554910	433674	259604	209290	220737	129525	154024	731850	1.03503e+06	495847	326937
O88989	3	3	191.13	0.0892055	1.28735	Old	Young	Malate dehydrogenase, cytoplasmic OS=Rattus norvegicus GN=Mdh1 PE=1 SV=3	3	2	2	7	2	0	1	1	2	4	2	1	0	0	0	0	0	0	499176	431875	412900	1.0699e+06	430538	129625	253476	325965	319187	414970	447193	134484	61026.2	5216.36	24669.5	32208.5	15778.1	36131.4
P31977	6	3	355.64	0.514362	2.73669	Young	Old	Ezrin OS=Rattus norvegicus GN=Ezr PE=1 SV=3	0	2	2	1	1	0	0	0	0	0	1	0	0	0	0	0	0	0	9.58586	87917.3	274386	134350	137696	190704	188185	3539.57	5529.95	22569.5	51430.8	7494.43	31743.1	223887	17156.2	4283.42	7263.04	8148.05
Q01460	5	5	462.05	0.570139	1.13683	Old	Young	Di-N-acetylchitobiase OS=Rattus norvegicus GN=Ctbs PE=1 SV=1	0	2	2	4	0	4	3	1	2	5	7	5	7	0	5	0	0	2	459859	566307	829944	1.55175e+06	516842	1.66055e+06	618360	518394	1.81389e+06	2.20342e+06	1.68562e+06	1.39224e+06	1.14166e+06	160501	2.59807e+06	69368.6	380551	1.39118e+06
P97546	3	3	236.13	0.644012	1.18446	Young	Old	Neuroplastin OS=Rattus norvegicus GN=Nptn PE=1 SV=2	0	2	2	1	2	0	4	6	4	3	5	3	3	1	2	0	2	2	136874	567718	343263	277990	543214	808751	1.98036e+06	3.59401e+06	2.68958e+06	1.6117e+06	1.01139e+06	1.39658e+06	733595	1.25864e+06	984816	373063	649784	1.53068e+06
Q9QX79	12	12	775.34	0.856813	1.01113	Old	Young	Fetuin-B OS=Rattus norvegicus GN=Fetub PE=2 SV=2	1	2	2	9	4	10	18	9	11	9	15	9	5	5	5	0	0	13	581308	744995	525950	1.47067e+06	1.20986e+06	2.44398e+06	4.32751e+06	3.28909e+06	3.21196e+06	2.73376e+06	2.33325e+06	1.77519e+06	1.48914e+06	4.83946e+06	1.576e+06	718664	689800	3.12167e+06
Q9JIK1	3	3	173.03	0.161943	1.78919	Young	Old	Cadherin-related family member 5 OS=Rattus norvegicus GN=Cdhr5 PE=1 SV=1	3	2	1	2	0	2	5	5	5	0	0	2	1	0	0	1	0	0	2.12826e+06	611285	1.12845e+06	643476	423572	1.22909e+06	1.08444e+06	1.79669e+06	1.09231e+06	901762	815795	766373	607335	263746	1.28798e+06	689615	24666.6	337863
Q9WUC4	4	4	296.16	0.127953	1.89139	Young	Old	Copper transport protein ATOX1 OS=Rattus norvegicus GN=Atox1 PE=1 SV=1	0	2	0	2	5	5	14	7	11	0	0	3	1	2	1	2	0	1	191728	344029	175835	289363	478358	422183	1.98815e+06	1.27856e+06	1.44202e+06	128020	118301	234198	278531	1.01113e+06	227625	857318	431415	170508
O70417	5	5	128.92	0.603996	1.53114	Young	Old	Prolactin-inducible protein homolog OS=Rattus norvegicus GN=Pip PE=2 SV=1	0	2	0	2	3	1	0	1	1	1	4	1	2	0	0	0	0	0	26036.3	347005	19302.3	152471	249022	163370	441.851	187956	228620	109442	204480	71596.3	119089	38149.1	2918.21	5469.91	284375	11244
P06911	2	2	96.28	0.778195	3.78647	Old	Young	Epididymal-specific lipocalin-5 OS=Rattus norvegicus GN=Lcn5 PE=1 SV=2	0	2	0	0	0	0	0	0	0	0	0	0	0	1	0	0	0	0	7488.68	37712.3	64.6255	7730.14	12112.3	18289.1	340.659	1476.68	1551.56	10053.6	2938.36	2384.74	8173.08	141495	11893.5	52600.4	183763	5231.22
P60711	11	4	783.39	0.255566	1.31777	Young	Old	Actin, cytoplasmic 1 OS=Rattus norvegicus GN=Actb PE=1 SV=1	3	1	15	7	4	5	7	4	3	3	3	1	0	2	6	4	1	4	3.61913e+06	1.08241e+06	5.01796e+06	6.34641e+06	1.18728e+06	4.9871e+06	2.07667e+06	2.75648e+06	1.85433e+06	1.36668e+06	1.84464e+06	1.00336e+06	1.29056e+06	3.54654e+06	2.2015e+06	6.83185e+06	2.52085e+06	2.49547e+06
P05371	5	5	624.98	0.35738	1.40302	Old	Young	Clusterin OS=Rattus norvegicus GN=Clu PE=1 SV=2	7	1	11	6	2	5	4	8	8	9	13	8	10	4	5	20	0	1	4.0531e+06	464490	3.85488e+06	836894	585916	1.0412e+06	1.76471e+06	2.48497e+06	2.55321e+06	3.42711e+06	3.65268e+06	1.95232e+06	2.04084e+06	7.57439e+06	3.51425e+06	9.33786e+06	3.2753e+06	1.72811e+06
Q9JJ40	8	8	381.84	0.000945792	3.83696	Young	Old	Na(+)/H(+) exchange regulatory cofactor NHE-RF3 OS=Rattus norvegicus GN=Pdzk1 PE=1 SV=2	11	1	8	8	1	3	2	2	3	0	0	0	0	0	0	3	0	2	3.35425e+06	647079	1.5643e+06	2.84913e+06	740734	2.25654e+06	339108	369134	747699	164516	101594	107339	155738	253181	289067	1.69702e+06	251223	650291
Q62867	5	5	230.15	0.214265	1.40036	Young	Old	Gamma-glutamyl hydrolase OS=Rattus norvegicus GN=Ggh PE=1 SV=1	6	1	7	2	1	2	7	2	6	0	1	0	0	4	0	1	0	0	1.80469e+06	319583	1.54524e+06	636994	399530	477744	1.00055e+06	162155	541386	186207	232678	190854	164557	1.35017e+06	1.02484e+06	2.47872e+06	703574	371145
P63018	6	6	450.52	0.712668	1.51531	Old	Young	Heat shock cognate 71 kDa protein OS=Rattus norvegicus GN=Hspa8 PE=1 SV=1	6	1	7	7	1	7	1	0	1	1	3	1	1	0	6	0	0	1	3.35917e+06	6.96285e+06	2.23911e+06	1.13829e+07	7.13461e+06	1.68741e+07	5.57349e+06	8.25549e+06	5.77498e+06	3.48768e+06	3.00405e+06	2.55798e+06	2.42397e+06	6.09067e+07	5.73981e+06	1.51365e+07	2.50693e+06	9.27296e+06
P15978	7	7	426.49	0.710563	1.13833	Old	Young	Class I histocompatibility antigen, Non-RT1.A alpha-1 chain OS=Rattus norvegicus GN=RT1-Aw2 PE=1 SV=1	4	1	6	10	0	2	3	2	4	11	12	6	4	3	1	4	2	3	1.22594e+06	687778	1.07002e+06	4.07736e+06	781524	410829	981261	1.77867e+06	1.24883e+06	2.8078e+06	3.18673e+06	2.14092e+06	1.80514e+06	2.54129e+06	584280	876034	860627	1.70378e+06
P27274	1	1	86.56	0.433545	1.61484	Young	Old	CD59 glycoprotein OS=Rattus norvegicus GN=Cd59 PE=1 SV=2	4	1	4	2	2	5	11	4	9	7	6	7	6	2	7	0	2	5	3.40676e+06	1.96702e+06	1.53034e+06	3.07564e+06	2.24247e+06	3.99668e+06	3.60787e+06	1.15264e+06	4.57398e+06	1.70747e+06	1.38693e+06	1.97975e+06	1.11444e+06	2.33795e+06	2.13531e+06	43418.9	1.17749e+06	3.94206e+06
Q5QSK2	1	1	34.78	0.902625	1.60614	Old	Young	Transmembrane protease serine 11G OS=Rattus norvegicus GN=Tmprss11g PE=2 SV=1	6	1	3	1	2	2	2	3	2	9	2	2	2	3	5	0	0	2	1.12814e+06	30272.6	535512	157935	62522.9	321293	239805	219435	324468	593292	523660	479587	283474	2.46186e+06	419894	2200.87	12428.9	73162.2
P29975	2	2	182.03	0.000133309	7.85219	Young	Old	Aquaporin-1 OS=Rattus norvegicus GN=Aqp1 PE=2 SV=4	3	1	2	1	1	1	0	0	0	cc	0	0	1	0	0	0	0	0	893502	226835	453096	351023	201883	587184	125073	94035.6	320537	57476	79686.4	45682.7	71460.9	15956.5	41319.4	158482	6256.9	74386.8
Q642A7	1	1	62.3	0.170397	3.43152	Young	Old	Protein FAM151A OS=Rattus norvegicus GN=Fam151a PE=2 SV=1	1	1	2	3	0	2	6	8	6	1	0	0	1	0	0	2	0	0	69016.6	90545.3	67562.3	117472	88705	80434.5	358666	679621	399027	45950.5	43121.8	75214	112063	5564.48	107690	119465	38065.3	21875.8
O08837	1	1	43.66	0.641108	2.19792	Old	Young	Cell division cycle 5-like protein OS=Rattus norvegicus GN=Cdc5l PE=1 SV=2	0	1	2	2	0	1	1	1	7	6	6	3	6	1	4	3	1	3	1.99409e+06	1.69509e+06	1.13371e+06	1.79459e+06	1.01285e+06	691093	250195	602161	2.38104e+06	4.63884e+06	5.74376e+06	6.28022e+06	4.86527e+06	361148	1.36564e+06	820741	295322	1.02533e+06
P20611	7	7	350.35	0.934216	1.03209	Young	Old	Lysosomal acid phosphatase OS=Rattus norvegicus GN=Acp2 PE=1 SV=1	7	1	2	2	1	9	13	12	9	3	1	1	1	1	10	3	0	4	1.84887e+06	589176	861856	627616	1.66726e+06	1.12919e+06	2.42954e+06	2.47713e+06	2.48133e+06	687877	556472	806716	728543	2.82256e+06	1.37471e+06	1.9762e+06	302288	677572
P01048	22	6	2652.18	6.64208e-06	9.03242	Old	Young	T-kininogen 1 OS=Rattus norvegicus GN=Map1 PE=1 SV=2	0	1	1	4	1	3	2	4	5	50	51	45	41	83	39	60	49	21	2.95123e+06	2.99433e+06	4.98162e+06	4.95424e+06	2.38728e+06	3.68088e+06	3.48124e+06	3.49182e+06	3.8716e+06	2.09057e+07	2.04276e+07	1.71526e+07	1.89808e+07	1.64914e+08	1.69404e+07	6.24358e+07	5.98341e+07	1.74313e+07
P23764	2	2	115.55	0.354038	1.54702	Old	Young	Glutathione peroxidase 3 OS=Rattus norvegicus GN=Gpx3 PE=2 SV=2	0	1	1	3	1	1	1	1	1	1	2	1	3	1	2	0	0	0	299756	393327	178031	616372	373536	370514	193854	315604	239781	325714	338717	456105	327633	1.04372e+06	434858	129368	1.16319e+06	364791
Q6AYD4	3	3	368.28	0.512719	5.30231	Old	Young	Endothelial cell-selective adhesion molecule OS=Rattus norvegicus GN=Esam PE=2 SV=1	0	1	1	2	2	0	2	3	1	2	0	4	0	0	2	1	0	2	219407	295313	338516	567493	344937	178920	233488	615464	133114	396332	259171	559929	285486	0	440750	299891	83067	726483
P10960	4	4	274.75	0.623047	2.92195	Young	Old	Sulfated glycoprotein 1 OS=Rattus norvegicus GN=Psap PE=1 SV=1	1	1	1	1	1	4	23	28	21	0	2	11	7	6	2	4	1	0	1.05017e+06	754247	316246	1.32964e+06	516114	2.87613e+06	1.26387e+07	7.91387e+06	1.14981e+07	467475	474222	1.44484e+06	916088	3.66715e+06	880160	2.91105e+06	815902	599903
P04797	3	3	183.68	0.676131	1.47551	Young	Old	Glyceraldehyde-3-phosphate dehydrogenase OS=Rattus norvegicus GN=Gapdh PE=1 SV=3	2	1	1	4	1	4	1	0	3	0	0	0	0	0	0	0	1	1	544242	272989	432247	821467	320038	700353	311226	103309	351191	226647	241807	126507	94295.9	551260	233463	300719	123731	349613
P31044	3	3	271.23	0.0290046	3.28112	Old	Young	Phosphatidylethanolamine-binding protein 1 OS=Rattus norvegicus GN=Pebp1 PE=1 SV=3	0	1	0	1	2	0	0	4	0	0	0	0	0	2	0	0	0	0	136900	325101	123748	108338	425444	131867	117087	776547	102948	401771	261141	184728	225779	3.9013e+06	388416	577861	1.01269e+06	258958
Q9QUL6	1	1	26.71	0.047559	3.65836	Old	Young	Vesicle-fusing ATPase OS=Rattus norvegicus GN=Nsf PE=1 SV=1	0	1	0	1	2	0	0	0	0	1	1	0	4	0	0	0	0	0	40183.9	77862.4	22988.2	429420	87398.4	187149	1.25933e+06	2.23767e+06	35549	4.82284e+06	3.50135e+06	3.03524e+06	2.16339e+06	346983	395455	85654	1.444e+06	338015
P04276	12	12	970.86	0.299146	1.60702	Old	Young	Vitamin D-binding protein OS=Rattus norvegicus GN=Gc PE=1 SV=3	2	1	0	6	3	14	11	12	8	3	4	2	2	4	2	32	7	6	741317	1.19399e+06	390734	2.09575e+06	1.10661e+06	5.24569e+06	4.29697e+06	3.51105e+06	3.28963e+06	1.77142e+06	1.75477e+06	1.06414e+06	872876	3.98535e+06	2.1938e+06	1.34764e+07	6.99627e+06	1.833e+06
P04073	2	2	181.24	0.32393	1.21672	Young	Old	Gastricsin OS=Rattus norvegicus GN=Pgc PE=1 SV=1	1	1	0	2	1	0	2	0	3	0	0	0	0	0	7	0	0	1	411803	198170	259322	586608	242345	481353	623728	293173	467888	416726	78795.3	205680	117766	207295	933422	399699	709953	595970
Q6P6Q2	6	3	258.61	0.391629	1.40054	Young	Old	Keratin, type II cytoskeletal 5 OS=Rattus norvegicus GN=Krt5 PE=1 SV=1	0	1	0	0	0	1	0	0	0	1	0	0	0	0	0	0	0	0	59664.2	117486	40848	43787.8	78190.3	86086	23555.2	121662	641.004	86534.7	15919.8	97711.8	17323.5	26.1134	114686	21952.7	37041.8	5536.5
Q5FVF9	4	4	367.04	0.672109	1.17688	Young	Old	Biotinidase OS=Rattus norvegicus GN=Btd PE=2 SV=1	5	1	0	4	2	4	3	20	10	1	2	1	1	7	6	3	1	1	1.38852e+06	694047	715997	818956	704062	536813	793787	2.08801e+06	1.2885e+06	604642	423562	365706	401617	1.55288e+06	904021	1.04929e+06	1.61926e+06	736244
B0BNN3	1	1	90.67	0.933255	1.54085	Young	Old	Carbonic anhydrase 1 OS=Rattus norvegicus GN=Ca1 PE=1 SV=1	0	1	0	2	2	1	0	0	0	0	0	2	0	0	0	0	0	0	67813.4	849270	43688.7	425790	829574	221085	24303.8	13855.7	33112.8	79895.2	92060	281649	296089	80260.6	154425	819471	102183	65534.2
P97580	8	7	558.72	0.0342542	2.61881	Young	Old	Beta-microseminoprotein OS=Rattus norvegicus GN=Msmb PE=1 SV=1	10	0	11	3	0	0	0	0	0	0	1	0	1	0	20	3	0	0	7.13011e+06	342383	3.08264e+06	1.15882e+06	292660	369905	1.3437e+06	725032	865567	339245	391734	426193	422972	66606.3	6.81212e+06	550140	70672.4	82669.2
Q03191	1	1	84.87	0.00115336	19.6655	Young	Old	Trefoil factor 3 OS=Rattus norvegicus GN=Tff3 PE=1 SV=1	3	0	8	2	0	8	7	11	12	0	0	0	0	0	0	1	0	0	1.52994e+06	225699	976009	552900	357819	2.80336e+06	3.07582e+06	2.57185e+07	1.79919e+07	36632.9	406758	93471	251108	2938.15	113455	1.75768e+06	375.971	81363.3
P19218	9	9	895.31	0.204334	4.929	Old	Young	Pancreatic secretory granule membrane major glycoprotein GP2 OS=Rattus norvegicus GN=Gp2 PE=1 SV=1	4	0	8	1	0	1	0	0	3	7	17	9	10	1	23	0	0	13	2.53176e+06	625990	1.33436e+06	727798	705829	356569	426969	639101	768902	4.76624e+06	4.6678e+06	3.40753e+06	2.8831e+06	574580	1.84089e+07	306869	26188.5	5.38797e+06
P10252	3	3	200.97	0.219716	1.2186	Young	Old	CD48 antigen OS=Rattus norvegicus GN=Cd48 PE=1 SV=1	2	0	8	5	0	2	6	2	2	1	2	2	3	2	2	2	0	0	729302	291743	673546	625063	366172	375760	672240	216804	726034	148780	127054	117622	200489	1.62657e+06	408317	1.10543e+06	2942.92	16681.4
Q6P7A9	5	5	376.09	0.0962876	1.34866	Young	Old	Lysosomal alpha-glucosidase OS=Rattus norvegicus GN=Gaa PE=2 SV=1	3	0	6	1	1	1	2	1	0	1	0	1	1	0	1	0	0	1	639757	251290	574467	228666	379942	264711	604867	305734	101992	170567	134754	122386	177268	1.20138e+06	330041	115998	8856.42	315230
Q63772	5	5	447.25	0.000429304	4.90527	Young	Old	Growth arrest-specific protein 6 OS=Rattus norvegicus GN=Gas6 PE=1 SV=1	4	0	5	0	0	0	2	2	2	0	0	0	0	0	0	0	0	2	479913	275644	615174	937090	196660	268931	332754	427625	450996	41096	52015.3	74276.2	97038.2	2704.84	141102	22155.2	31290.9	330209
Q03626	25	5	1971.26	0.48801	1.04288	Old	Young	Murinoglobulin-1 OS=Rattus norvegicus GN=Mug1 PE=2 SV=1	2	0	5	1	1	2	2	3	4	6	7	6	9	4	8	7	7	5	5.59261e+06	775816	3.58189e+06	1.40503e+06	2.09577e+06	1.85766e+06	8.65231e+06	2.25794e+06	3.32556e+06	3.30258e+06	3.10833e+06	2.73505e+06	3.0353e+06	3.45053e+06	4.03929e+06	4.27125e+06	4.7369e+06	2.50314e+06
O35763	8	5	573	0.920195	1.11155	Young	Old	Moesin OS=Rattus norvegicus GN=Msn PE=1 SV=3	2	0	4	3	0	1	0	0	0	1	0	0	0	0	1	0	0	0	483532	197545	420869	545578	124560	904907	31229.9	38354.6	250967	630934	856375	351819	445940	133229	1.51404e+06	297411	6863.23	284509
P01681	4	4	403.26	0.0123017	2.94568	Old	Young	Ig kappa chain V region S211 OS=Rattus norvegicus PE=1 SV=1	3	0	3	1	0	5	9	20	12	50	24	20	13	38	25	19	15	26	3.63751e+06	1.04389e+06	3.76119e+06	1.09254e+07	1.18332e+06	8.22217e+06	1.58867e+07	2.80185e+07	2.06017e+07	2.57096e+07	2.48398e+07	2.24105e+07	1.70017e+07	7.34818e+07	2.3701e+07	3.44142e+07	7.46798e+07	2.64785e+07
Q6IUU3	3	3	274.93	0.426565	1.43786	Young	Old	Sulfhydryl oxidase 1 OS=Rattus norvegicus GN=Qsox1 PE=1 SV=1	4	0	3	1	0	4	4	5	8	3	4	3	1	0	5	0	6	0	1.27881e+06	227734	860679	326121	116131	664398	871016	986716	947281	573795	391305	453585	285705	88624.2	888772	28690.8	1.31926e+06	320030
P00786	1	1	77.08	0.524775	2.18575	Old	Young	Pro-cathepsin H OS=Rattus norvegicus GN=Ctsh PE=1 SV=1	3	0	3	4	0	4	0	1	0	0	0	0	1	0	1	0	0	2	378910	208698	279999	452391	64538	312881	66520.2	241250	155424	221254	192905	153985	134765	2.76351e+06	240453	137133	524127	431244
Q62930	5	5	420.12	0.83907	1.56842	Old	Young	Complement component C9 OS=Rattus norvegicus GN=C9 PE=2 SV=1	3	0	3	4	0	2	1	0	1	2	2	0	0	4	0	8	6	1	1.1492e+06	933154	1.41717e+06	708701	952706	419790	708652	285519	386544	262525	201442	130902	337975	1.61959e+06	223900	1.25393e+06	6.19779e+06	148372
P62738	8	1	359.49	0.0595171	9.40641	Young	Old	Actin, aortic smooth muscle OS=Rattus norvegicus GN=Acta2 PE=2 SV=1	2	0	2	0	0	2	0	0	0	0	0	0	0	0	1	0	0	0	723310	206245	621995	409386	109203	724848	220997	184579	462007	181239	189376	116506	89639.8	41042	815854	223830	140638	353137
O70244	7	7	496.81	0.139894	2.19996	Young	Old	Cubilin OS=Rattus norvegicus GN=Cubn PE=1 SV=2	7	0	2	0	0	1	1	0	2	0	0	0	0	0	0	0	0	2	1.11176e+06	423548	561088	154484	173529	294551	901958	1.51489e+06	3.64164e+06	313055	301867	380462	295672	142141	282582	680041	337095	1.39274e+06
P01026	14	13	1016.53	0.253902	2.03048	Old	Young	Complement C3 OS=Rattus norvegicus GN=C3 PE=1 SV=3	7	0	2	2	0	4	1	0	3	9	5	1	0	1	7	16	5	1	1.47774e+06	610538	843889	2.09689e+06	631629	1.62218e+06	1.40911e+06	1.27956e+06	1.13714e+06	2.00751e+06	2.04809e+06	447087	363937	1.69601e+06	2.2613e+06	5.63508e+06	8.35683e+06	1.12752e+06
P08649	4	4	326.26	0.515537	1.11377	Young	Old	Complement C4 OS=Rattus norvegicus GN=C4 PE=1 SV=3	1	0	2	8	1	7	1	6	10	2	1	4	6	0	0	1	0	2	2.8034e+06	3.02755e+06	994912	6.31027e+06	1.58869e+06	3.31245e+06	5.51896e+06	7.07084e+06	8.37072e+06	1.42683e+06	1.15271e+06	5.66779e+06	3.13732e+06	1.73144e+07	1.11892e+06	960301	20648.1	3.06894e+06
Q9ES87	1	1	38.75	0.707083	1.52103	Old	Young	Prostasin OS=Rattus norvegicus GN=Prss8 PE=2 SV=3	1	0	2	0	0	0	0	0	0	1	1	0	0	0	0	0	0	0	158140	61289.4	92209.2	163168	55666.2	56880.9	109005	53152.5	69901.3	86179.7	71572	140346	88677.3	0	142259	271098	275167	171054
P68255	2	1	116.75	0.0288324	3.03628	Young	Old	14-3-3 protein theta OS=Rattus norvegicus GN=Ywhaq PE=1 SV=1	0	0	1	1	0	1	0	0	0	0	0	0	0	0	1	0	0	1	9521.92	133316	33673.3	90939.8	89746.3	57105	1497.8	7795.95	37479	30151.4	14555.5	20221.3	5908.08	0	53672.6	42.5239	0	31048.1
P42123	2	2	62.74	0.0475261	5.95013	Young	Old	L-lactate dehydrogenase B chain OS=Rattus norvegicus GN=Ldhb PE=1 SV=2	0	0	1	1	0	0	0	0	0	0	3	0	0	0	0	0	0	0	316.35	591077	90221.6	107193	375882	34710.3	1065.24	17735.8	2963.15	2050.9	109431	1956.31	71799.3	0	12056.7	2.5566	0	7668.74
P08460	1	1	168.15	0.0540456	1.50296	Young	Old	Nidogen-1 (Fragment) OS=Rattus norvegicus GN=Nid1 PE=2 SV=2	2	0	1	0	0	0	7	10	4	2	3	0	0	0	1	0	0	0	1.46694e+06	1.56173e+06	1.14344e+06	1.22092e+06	914572	978078	2.10675e+06	4.51774e+06	2.44908e+06	778841	428069	498898	971318	414663	614276	2.56745e+06	4.78648e+06	800284
P04904	2	1	99.89	0.0727251	1.43709	Young	Old	Glutathione S-transferase alpha-3 OS=Rattus norvegicus GN=Gsta3 PE=1 SV=3	1	0	1	0	0	0	0	0	0	1	0	0	0	0	0	0	0	0	49174.7	6138.35	33903	133408	11068.2	38696.3	44832.6	87224.8	17861.5	79339.1	30319.6	13146.8	11890.6	19.8679	17513	0.769153	58.5547	16376.9
O55006	3	3	368.5	0.154044	2.53356	Old	Young	Protein RoBo-1 OS=Rattus norvegicus PE=1 SV=1	1	0	1	3	0	4	2	1	2	4	6	4	4	0	8	4	0	4	581778	10655.1	341955	756860	212921	927777	703955	436747	529486	815340	1.04914e+06	943326	780815	2.97423e+06	2.08352e+06	1.60019e+06	43100.4	1.44049e+06
Q4QQW8	1	1	105.72	0.16671	1.35856	Old	Young	Putative phospholipase B-like 2 OS=Rattus norvegicus GN=Plbd2 PE=1 SV=2	2	0	1	1	0	2	1	0	1	0	0	1	0	1	0	1	0	1	179614	42760.1	145984	105059	53130.9	126529	107735	101857	126171	50020.8	45579.4	44679.7	41905.3	755453	193701	367110	0	117168
Q63691	2	2	216.48	0.17942	1.36959	Young	Old	Monocyte differentiation antigen CD14 OS=Rattus norvegicus GN=Cd14 PE=2 SV=2	3	0	1	0	2	0	5	0	2	0	0	0	0	3	2	1	0	2	184139	29225.4	84401.8	47028.9	63778.5	60183.6	521731	203995	415961	83126.3	35074.4	55346.4	32109.6	665323	140772	111032	4948.49	239530
Q0PMD2	2	2	90.54	0.310461	2.66734	Young	Old	Anthrax toxin receptor 1 OS=Rattus norvegicus GN=Antxr1 PE=2 SV=2	3	0	1	2	0	1	3	3	3	0	1	0	0	0	1	0	0	2	693313	477685	672725	818289	301083	656146	364309	600837	346008	166388	236098	195871	169053	43174.3	130952	98447.6	158467	88733.9
P60905	1	1	143.47	0.356632	2.02176	Young	Old	DnaJ homolog subfamily C member 5 OS=Rattus norvegicus GN=Dnajc5 PE=1 SV=1	3	0	1	0	0	1	0	0	0	1	0	1	0	0	0	0	0	0	182769	97964.4	78838	73864.9	37831.3	11270.2	12748.5	55.9422	2075.6	11876.3	15372.4	12320.9	9583.31	18.4291	1345.93	153.61	1905.79	65213.9
Q9R1T3	1	1	127.18	0.386304	2.23067	Old	Young	Cathepsin Z OS=Rattus norvegicus GN=Ctsz PE=1 SV=2	0	0	1	1	0	0	0	0	0	0	2	0	1	0	0	0	0	0	5511.41	5743.45	21348.1	43818.5	850.624	20619.1	57.3673	40.8833	46.8617	797.135	25761.1	5529.37	26182.3	0	286.247	7.98553	0	589.475
P61972	2	2	70.02	0.432322	5.9283	Old	Young	Nuclear transport factor 2 OS=Rattus norvegicus GN=Nutf2 PE=1 SV=1	0	0	1	0	0	0	0	0	0	0	0	0	0	0	0	1	0	0	76757	26591	120938	26078.5	16797.9	211987	171886	41995.3	22954.3	79278.9	76391.6	165097	21060.2	127491	114418	4.94872e+06	42018.8	30692.4
P50115	5	5	465.03	0.440617	2.62411	Old	Young	Protein S100-A8 OS=Rattus norvegicus GN=S100a8 PE=1 SV=3	3	0	1	0	0	0	0	0	0	4	1	1	0	0	13	0	0	1	774352	187506	496804	144657	272580	331639	313848	714028	677078	680080	405913	338232	220417	410296	7.65598e+06	800826	153545	661356
P19112	1	1	120.3	0.610265	1.54919	Young	Old	Fructose-1,6-bisphosphatase 1 OS=Rattus norvegicus GN=Fbp1 PE=1 SV=2	0	0	1	2	0	0	0	0	0	0	2	0	0	0	0	0	0	0	530.686	12516.5	52710.9	142415	16589.8	46916.8	33.9904	35.7778	33.9693	12567.8	53614.7	7822.45	17109.2	4.26133	1424.61	63.0964	0.191512	298.533
P80067	2	2	88	0.628129	1.70677	Young	Old	Dipeptidyl peptidase 1 OS=Rattus norvegicus GN=Ctsc PE=1 SV=3	0	0	1	0	0	0	0	0	1	0	1	0	0	0	0	1	0	0	60910.9	23806.5	242080	47333	35578.4	0	142616	11341.4	221782	36644.9	133638	51966	53083.7	39416.7	277.049	132180	20377.8	1726.76
Q99J86	2	2	115.69	0.957771	1.10291	Young	Old	Attractin OS=Rattus norvegicus GN=Atrn PE=2 SV=1	0	0	1	0	0	0	0	0	0	2	0	1	1	0	0	1	0	0	36554.6	71213.8	136558	54614.1	109114	83617.1	215433	146895	163567	122120	101284	143188	106239	22888.7	157102	78657.8	60984.4	124169
P08932	23	7	2734.48	1.84962e-06	8.50123	Old	Young	T-kininogen 2 OS=Rattus norvegicus PE=1 SV=2	0	0	0	1	1	0	0	0	0	25	22	19	22	14	6	24	37	2	481391	1.01949e+06	581378	811589	1.1232e+06	465968	511936	527787	415740	3.75893e+06	4.25362e+06	4.50621e+06	3.9314e+06	9.01704e+06	1.47262e+06	1.01328e+07	1.66109e+07	1.64707e+06
Q9Z340	1	1	23.29	0.000860758	2.12487	Old	Young	Partitioning defective 3 homolog OS=Rattus norvegicus GN=Pard3 PE=1 SV=1	0	0	0	1	0	0	0	0	0	0	0	0	0	1	0	0	0	0	131801	20599.3	134676	221424	66988	360707	242995	478235	165378	7.60845e+06	7.11573e+06	7.25812e+06	5.37137e+06	8.41484e+06	7.6479e+06	7.65225e+06	8.20735e+07	2.23209e+06
P50430	2	2	61	0.00402137	1.17181	Young	Old	Arylsulfatase B OS=Rattus norvegicus GN=Arsb PE=2 SV=2	0	0	0	1	0	0	0	0	0	0	0	0	0	0	0	0	0	1	75066.2	8456.33	1694.69	32188.9	3324.81	41107.9	2016.22	4382.81	2465.94	938.411	0	0	3.06449	702.701	0	0	0	57268.4
P08937	5	5	292.08	0.00521976	4.73496	Old	Young	Odorant-binding protein OS=Rattus norvegicus GN=Obp1f PE=1 SV=1	3	0	0	0	0	4	0	0	6	5	5	2	5	4	19	0	0	5	1.19997e+06	347657	728688	653985	283460	1.53439e+06	1.69661e+06	927329	4.14932e+06	3.74186e+06	4.25416e+06	3.07377e+06	3.17645e+06	7.08726e+06	2.67746e+07	1.21596e+06	1.53417e+06	6.06265e+06
P02091	8	2	755.78	0.0131203	22.4747	Old	Young	Hemoglobin subunit beta-1 OS=Rattus norvegicus GN=Hbb PE=1 SV=3	0	0	0	3	0	0	0	0	0	0	0	4	2	0	2	4	0	0	361561	104599	197175	1.42871e+06	41758.4	82904.7	326546	101956	61062.6	286270	226890	5.41515e+06	3.62386e+06	147169	646744	4.03378e+07	250941	219355
P07154	3	3	184.22	0.0134532	2.78858	Young	Old	Cathepsin L1 OS=Rattus norvegicus GN=Ctsl1 PE=1 SV=2	1	0	0	0	0	0	0	3	1	0	1	0	0	0	2	0	0	0	1.28784e+06	364007	939786	151976	288413	311531	1.31825e+06	929845	1.57581e+06	367354	364351	328543	208599	484509	309825	368847	71436.6	70768.3
Q03336	1	1	31.14	0.0142496	4.07501	Old	Young	Regucalcin OS=Rattus norvegicus GN=Rgn PE=1 SV=3	2	0	0	0	0	1	0	0	0	0	0	0	0	0	0	1	0	0	157740	303261	193447	427373	62181.8	162041	13078.8	180886	16081.6	582185	365052	1.37554e+06	1.77158e+06	617229	194419	798585	322432	74626.2
P26644	2	2	96.71	0.0232295	4.20111	Young	Old	Beta-2-glycoprotein 1 OS=Rattus norvegicus GN=Apoh PE=2 SV=2	0	0	0	0	0	2	4	2	2	0	0	0	0	0	1	0	0	1	152299	226149	91893.7	509804	167526	552613	920831	289255	618054	121776	44482.5	96530.4	32394.8	197.913	140743	1252.86	5728.08	381451
P11517	7	1	726.24	0.0284663	8.14094	Old	Young	Hemoglobin subunit beta-2 OS=Rattus norvegicus PE=1 SV=2	0	0	0	3	0	0	0	0	0	0	0	2	3	0	0	7	0	0	80864.5	79745.2	67279.1	435155	108361	84587.1	22497.5	35220.9	28245	160755	135206	694204	684066	431930	247971	1.89008e+07	524644	74109.9
Q08420	3	3	255.91	0.054621	2.19632	Old	Young	Extracellular superoxide dismutase [Cu-Zn] OS=Rattus norvegicus GN=Sod3 PE=1 SV=2	1	0	0	3	0	1	3	3	2	3	5	3	7	3	2	2	0	2	203703	230718	171220	398599	268529	134012	176223	283136	183868	446184	601758	444786	567711	1.45341e+06	343140	466393	156854	283151
O35112	1	1	81.93	0.0776165	1.10561	Young	Old	CD166 antigen OS=Rattus norvegicus GN=Alcam PE=1 SV=1	1	0	0	0	0	1	1	2	2	1	1	0	0	0	2	0	0	0	19819.8	4418.21	20771.2	32600.2	2670.83	43356.9	17116	134782	70371.9	63832.3	42473.8	51753.2	49228.2	0	93886	0	0	13546
O70513	3	3	259.17	0.114841	1.46427	Young	Old	Galectin-3-binding protein OS=Rattus norvegicus GN=Lgals3bp PE=1 SV=2	2	0	0	0	0	6	5	2	2	3	3	0	0	1	1	1	0	5	747681	1.12419e+06	693897	588082	383721	997050	545448	564535	771203	645839	546095	468378	498438	310113	414208	919225	13705.7	999299
Q02765	1	1	43.25	0.11771	3.01346	Young	Old	Cathepsin S OS=Rattus norvegicus GN=Ctss PE=2 SV=1	0	0	0	0	0	1	1	0	2	0	0	0	0	1	1	0	0	0	57186.3	286383	43620	605032	265657	265755	90002.3	66174.9	175613	210156	173750	176483	200309	111256	166399	7400.05	97178.8	14545.3
P01946	7	7	709.97	0.118262	4.7379	Old	Young	Hemoglobin subunit alpha-1/2 OS=Rattus norvegicus GN=Hba1 PE=1 SV=3	0	0	0	14	0	0	8	10	0	0	0	29	22	0	7	50	0	0	2.303e+06	1.34221e+06	1.33901e+06	5.18669e+06	1.63601e+06	957089	2.58878e+06	2.8752e+06	1.6472e+06	1.57462e+06	1.50258e+06	2.22795e+07	1.63861e+07	1.5498e+06	4.03027e+06	1.23082e+08	4.44746e+06	1.77906e+06
Q66H12	1	1	38.17	0.118561	1.96882	Young	Old	Alpha-N-acetylgalactosaminidase OS=Rattus norvegicus GN=Naga PE=2 SV=1	0	0	0	0	0	0	1	0	1	0	0	0	0	0	0	0	0	1	32820.8	24754.8	39566.5	31294.8	89126.1	48270.9	67654.3	2288.32	63748.2	16996.1	20718.2	32722.6	20008.1	0	49301.4	1315.27	0.0468602	61876.9
P08592	3	3	169.95	0.118787	1.73383	Young	Old	Amyloid beta A4 protein OS=Rattus norvegicus GN=App PE=1 SV=2	0	0	0	3	2	1	4	5	5	1	1	2	1	2	3	0	0	0	167921	48803.8	105889	182117	143628	102346	402440	607758	486028	128633	133440	86190.8	101402	551146	216896	126734	8877.6	165279
P48199	1	1	45.74	0.136057	31.4578	Old	Young	C-reactive protein OS=Rattus norvegicus GN=Crp PE=1 SV=1	0	0	0	0	0	0	2	0	0	0	0	0	0	3	0	3	0	0	2988.84	25978.4	9759.3	11167.9	7436.8	2673.54	176400	18039.8	40.8275	3425.34	5584.77	7145.72	13065.7	3.94072e+06	197.011	3.92422e+06	18780.3	31347.7
P20759	8	2	622.77	0.156158	4.84688	Old	Young	Ig gamma-1 chain C region OS=Rattus norvegicus PE=1 SV=1	0	0	0	0	0	2	0	0	0	2	3	0	0	0	2	0	0	2	14674.4	8156.92	33523.8	40455.9	15849.1	260609	49927.2	4051.85	80429.4	675892	599759	272229	87636.1	139091	249162	30855.3	178.064	396336
P23377	1	1	39.93	0.187832	1.63576	Old	Young	Furin OS=Rattus norvegicus GN=Furin PE=1 SV=1	1	0	0	0	0	0	0	0	0	0	0	0	0	0	0	0	0	1	107043	9718.57	73663.4	46644.8	19485.1	73763.7	113821	180038	131128	57604.8	34111.7	48405.8	43447.7	366191	126724	227645	205855	85778.1
B5DFC9	5	5	193.08	0.200928	1.1773	Young	Old	Nidogen-2 OS=Rattus norvegicus GN=Nid2 PE=2 SV=1	0	0	0	0	1	0	1	2	4	0	1	0	0	0	0	0	0	0	245037	609216	152055	599569	440700	145588	1.52822e+06	645185	1.74368e+06	298852	249526	98276.6	113595	133491	137528	190934	316165	72209.2
P45479	1	1	47.89	0.238293	1.15888	Old	Young	Palmitoyl-protein thioesterase 1 OS=Rattus norvegicus GN=Ppt1 PE=1 SV=1	0	0	0	0	0	0	0	0	2	0	0	0	0	0	0	1	0	0	7498.2	74.9284	7596.01	2649.67	194098	51087	58531.2	7300.16	80809.1	20335.9	18931.4	4575.08	8515.55	23971.9	113750	151711	29856.4	66018.1
P47967	4	3	170.45	0.286509	1.27402	Young	Old	Galectin-5 OS=Rattus norvegicus GN=Lgals5 PE=1 SV=2	0	0	0	0	1	0	0	0	1	0	0	2	3	0	0	0	0	0	80301.7	124755	45478	119508	154996	38716.6	6493.16	4857.24	155958	9816.44	37178.3	276318	210215	16702	68.3352	618.258	15948.8	685.125
P25304	1	1	30.75	0.302576	3.48239	Young	Old	Agrin OS=Rattus norvegicus GN=Agrn PE=1 SV=2	0	0	0	0	0	0	1	0	0	0	0	0	0	0	0	0	0	1	574.342	34217	5433.55	359.338	2318.22	9514.07	23436.7	604.553	0	186.74	935.496	2160.88	1320.57	0	0	1.99264	0	8954.9
Q62740	2	2	61.57	0.309414	4.28391	Young	Old	Secreted phosphoprotein 24 OS=Rattus norvegicus GN=Spp2 PE=2 SV=2	0	0	0	0	0	0	0	0	1	0	1	0	0	0	0	0	0	0	6644.11	9019.57	13500.2	40492.7	12679.8	16073.3	1722.42	4551.16	180301	2558.81	21578.8	5687.86	19567.6	0	3762.01	1022.8	0	10410.1
P36376	2	1	153.84	0.343482	3.3518	Old	Young	Glandular kallikrein-12, submandibular/renal OS=Rattus norvegicus GN=Klk12 PE=2 SV=1	1	0	0	0	0	0	5	3	3	1	1	2	3	4	3	6	0	0	841048	184415	341050	1.38762e+06	432766	159714	1.78034e+06	1.89547e+06	772636	702133	702685	2.1884e+06	1.78354e+06	1.04816e+07	4.44731e+06	4.70997e+06	1.14139e+06	136356
Q8VD89	4	4	309.46	0.436789	1.55944	Young	Old	Ribonuclease pancreatic gamma-type OS=Rattus norvegicus PE=3 SV=1	1	0	0	11	0	0	0	0	0	0	0	2	1	0	0	0	0	0	111671	133896	73016.2	1.38899e+06	185341	23165.2	13869.2	127902	108178	90808.1	55239.3	170722	182629	102693	288898	80221.8	87592.5	200763
Q3KRC4	1	1	128.97	0.484635	1.00721	Old	Young	G-protein coupled receptor family C group 5 member C OS=Rattus norvegicus GN=Gprc5c PE=2 SV=2	2	0	0	0	0	0	0	0	0	0	0	0	0	0	0	0	0	1	136714	22048.7	25984.2	3856.04	25557.6	576.071	1556.92	81.9034	0	199.826	1407.59	498.788	1318.79	6563.23	1704.11	11210.5	1736.48	186774
Q9Z1Y3	2	2	117.45	0.531505	1.85914	Young	Old	Cadherin-2 OS=Rattus norvegicus GN=Cdh2 PE=1 SV=1	1	0	0	0	0	0	1	1	2	1	1	0	0	0	0	0	0	0	7825.96	3985.96	7195.89	0	29765.2	0	62206.4	97277.7	123932	27323.7	43634.5	28214.9	23095.4	328.174	0	43050.9	2067.71	2535.95
Q5M929	1	1	35.51	0.595955	3.67087	Old	Young	E3 ubiquitin-protein ligase RNF135 OS=Rattus norvegicus GN=Rnf135 PE=2 SV=1	0	0	0	0	1	0	0	0	0	0	0	0	2	0	0	0	0	0	152.145	140467	65817.1	185189	167710	231359	3869.68	15966.3	93002.8	988992	861084	646925	584360	0	217671	374.275	0	17347.3
Q63751	1	1	89.41	0.620207	1.24779	Old	Young	Vomeromodulin (Fragment) OS=Rattus norvegicus PE=2 SV=1	1	0	0	0	0	0	0	0	3	1	0	0	0	0	2	0	0	0	566834	81720.7	479809	107978	6029.96	26063.4	49734	7294.7	219770	192904	188962	39711.1	21820.6	289028	818070	40159.9	7944.89	0
P52759	1	1	92.69	0.626494	1.97416	Young	Old	Ribonuclease UK114 OS=Rattus norvegicus GN=Hrsp12 PE=1 SV=3	0	0	0	1	0	0	0	0	0	0	1	0	0	0	0	0	0	0	14070.1	231565	17555.1	167509	66589.5	136225	514.569	11959.6	2766.42	12063.8	152201	7834.47	30986.5	174643	119332	110.075	7640.54	85664.7
Q9JIH7	1	1	22.17	0.638389	2.01898	Young	Old	Serine/threonine-protein kinase WNK1 OS=Rattus norvegicus GN=Wnk1 PE=1 SV=2	0	0	0	1	2	1	0	0	0	0	0	0	0	0	1	0	0	0	59940.2	236949	25167.6	94379.5	173763	79149.4	0	879.341	0	89455.9	41159.8	131491	40867.1	8316.63	20672.4	0	0	0
O55004	2	2	149.28	0.710962	1.06299	Old	Young	Ribonuclease 4 OS=Rattus norvegicus GN=Rnase4 PE=1 SV=1	0	0	0	3	0	1	0	0	0	0	0	0	0	0	0	0	0	1	23360.2	20079.2	20883.2	191912	49182.7	231903	31841.2	6225.72	44301.3	18443.7	12820.4	24087.4	18909.5	165035	3196.52	40246.5	8429.27	243079
Q9JHY1	4	4	390.17	0.761606	1.45098	Young	Old	Junctional adhesion molecule A OS=Rattus norvegicus GN=F11r PE=2 SV=1	0	0	0	0	0	0	5	4	14	0	0	0	0	1	0	0	0	7	299944	744491	79478.3	575620	631662	1.06779e+06	2.72913e+06	3.23638e+06	5.76028e+06	414746	468455	340514	262038	2.04147e+06	979623	2.21966e+06	715179	3.10624e+06
P02680	3	3	145.33	0.769207	2.19734	Old	Young	Fibrinogen gamma chain OS=Rattus norvegicus GN=Fgg PE=1 SV=3	0	0	0	0	0	0	0	1	0	0	0	0	0	0	4	3	0	0	2591.37	178733	17390.3	248991	166484	57167.7	35419.9	86984	62731.5	113019	163353	53954.1	163282	0	608157	641678	10620.3	361876
P62804	1	1	29.98	0.802254	1.37323	Young	Old	Histone H4 OS=Rattus norvegicus GN=Hist1h4b PE=1 SV=2	0	0	0	0	0	0	0	0	2	0	0	0	0	0	1	0	0	0	0	1049.41	0	0	4921.58	0	1469.5	16077	72073.4	22280	7376.69	0	0	0	30639.5	0	0	9314.24
O08628	2	2	108.33	0.928129	3.02743	Young	Old	Procollagen C-endopeptidase enhancer 1 OS=Rattus norvegicus GN=Pcolce PE=1 SV=1	0	0	0	0	0	0	0	2	2	0	0	0	0	0	0	0	0	1	89274.8	0	30900	417.868	3006.16	0	3008.05	52557.8	30707.7	14407.5	4198.92	5158.2	191.227	1744.97	3353.64	37863.3	12526.8	46443.1
Q6MG71	1	1	48.95	0.967786	1.06521	Young	Old	Choline transporter-like protein 4 OS=Rattus norvegicus GN=Slc44a4 PE=2 SV=1	1	0	0	0	0	1	0	1	2	0	0	0	0	1	1	1	0	1	35130.2	0	24854.4	12982.6	2697.17	79355.7	16747.5	120635	45906.4	13734.8	4409.01	11727.4	11367.4	133615	26084.8	60144.5	0	56517.2
P00714	1	1	108.48	0.96975	2.13696	Old	Young	Alpha-lactalbumin OS=Rattus norvegicus GN=Lalba PE=1 SV=1	1	0	0	0	0	0	0	0	0	1	1	2	1	0	0	0	0	0	37550.8	3996.41	16502	25325.4	2515.19	10494.9	0.496206	314.01	0	36083.7	28300.5	79018	59192.2	26.7025	3118.12	0	0	903.5
P51635	2	2	69.9	0.997889	1.11251	Old	Young	Alcohol dehydrogenase [NADP(+)] OS=Rattus norvegicus GN=Akr1a1 PE=1 SV=2	2	0	0	3	0	2	0	0	0	1	1	0	0	0	0	0	0	0	106765	32587	84421.8	318626	21887	97993.2	6341.29	45254.9	13787.5	164458	177758	13054	9901.02	12989.7	40832.4	324382	20977.3	68892.4
